# Supplementary material for: Complete genome sequencing and the mitochondrial genome analysis of Tylenchulus semipenetrans, an important Tylenchulidae nematode causing citrus slow decline disease
Source: Research Square preprint supplement (doi:10.21203/rs.3.rs-7248207/v1), 2025-08-08
Supplement: Supplementary file 1 [file 974598152f53470216096933.xlsx]

## Sheet: Table S1
Table S1 GO analysis
GO ID (level1)	GO Term (level1)	GO ID (level2)	GO Term (level2)	Gene Number (1)	Gene List (1)
GO:0008150	biological_process	GO:0009987	cellular process	3727	g7208.t1,g10518.t1,g7333.t2,g3925.t1,g5415.t3,g1388.t1,g9739.t1,g238.t3,g1051.t1,g5931.t1,g7108.t1,g2658.t1,g3739.t3,g10928.t2,g7768.t2,g7094.t1,g1655.t1,g6260.t1,g865.t1,g5788.t1,g3570.t1,g306.t1,g10860.t1,g6883.t2,g1118.t1,g2957.t2,g2830.t1,g7455.t1,g3193.t3,g6796.t1,g10297.t1,g1613.t1,g5501.t1,g3186.t1,g878.t2,g2241.t2,g1723.t2,g5122.t1,g5799.t1,g1079.t1,g5096.t3,g7810.t1,g306.t2,g3360.t1,g739…
.t1,g4637.t2,g5440.t1,g9377.t1,g6648.t1,g6818.t4,g5262.t2,g5922.t2,g5834.t1,g10709.t2,g10469.t2,g1457.t1,g10874.t1,g10532.t1,g5835.t1,g226.t1,g3535.t3,g10849.t1,g10771.t1,g5692.t1,g11040.t1,g9137.t2,g3687.t1,g10989.t1,g2741.t1,g9661.t3,g4637.t1,g6881.t1,g3475.t2,g10737.t1,g2742.t1,g1055.t1,g6333.t3,g5881.t1,g1569.t1,g238.t2,g1088.t2,g7160.t1,g4627.t1,g2850.t2,g2989.t1,g6756.t1,g5562.t1,g566.t1,g7…
GO:0008150	biological_process	GO:0065007	biological regulation	2696	g10518.t1,g7333.t2,g1388.t1,g5415.t3,g9739.t1,g238.t3,g5931.t1,g7108.t1,g2658.t1,g3739.t3,g10928.t2,g7768.t2,g1655.t1,g6260.t1,g7094.t1,g865.t1,g5788.t1,g3570.t1,g10860.t1,g306.t1,g2957.t2,g7455.t1,g3193.t3,g10297.t1,g6796.t1,g1613.t1,g878.t2,g7807.t1,g1723.t2,g5799.t1,g5122.t1,g1079.t1,g306.t2,g1667.t3,g8160.t1,g5636.t1,g8777.t2,g7035.t1,g1701.t1,g2846.t2,g139.t1,g3519.t1,g5563.t2,g4120.t1,g3878…
GO:0008150	biological_process	GO:0008152	metabolic process	2666	g7208.t1,g10518.t1,g3925.t1,g5415.t3,g1388.t1,g9739.t1,g238.t3,g1051.t1,g5931.t1,g7108.t1,g2658.t1,g10226.t1,g7768.t2,g7094.t1,g1655.t1,g6260.t1,g865.t1,g5788.t1,g3570.t1,g10860.t1,g6883.t2,g1118.t1,g2830.t1,g7455.t1,g10297.t1,g6796.t1,g1613.t1,g5501.t1,g7807.t1,g3186.t1,g878.t2,g1723.t2,g5122.t1,g1079.t1,g5096.t3,g7810.t1,g7394.t1,g9957.t1,g8160.t1,g5636.t1,g8777.t2,g2846.t2,g139.t1,g3519.t1,g55…
GO:0008150	biological_process	GO:0032501	multicellular organismal process	2195	g9739.t1,g5931.t1,g2658.t1,g7108.t1,g3739.t3,g7094.t1,g6260.t1,g3570.t1,g306.t1,g2957.t2,g7455.t1,g3193.t3,g6796.t1,g10297.t1,g1613.t1,g878.t2,g7807.t1,g2241.t2,g1723.t2,g3749.t2,g5122.t1,g1079.t1,g306.t2,g8678.t1,g9957.t1,g8160.t1,g1701.t1,g2846.t2,g6418.t2,g139.t1,g3519.t1,g5563.t2,g3878.t2,g8781.t1,g5820.t1,g1089.t1,g6260.t2,g3683.t4,g1029.t1,g2977.t1,g7151.t1,g3795.t1,g2869.t4,g7161.t1,g3462.…
GO:0008150	biological_process	GO:0032502	developmental process	1980	g4219.t2,g5931.t1,g5622.t1,g9919.t2,g7108.t1,g2658.t1,g3739.t3,g9758.t1,g6260.t1,g4225.t1,g3570.t1,g3542.t1,g306.t1,g9766.t3,g9089.t2,g995.t1,g3138.t4,g2957.t2,g7441.t2,g7824.t1,g7455.t1,g8731.t1,g6796.t1,g3193.t3,g10297.t1,g1613.t1,g7807.t1,g2241.t2,g921.t2,g1723.t2,g5799.t1,g5122.t1,g5886.t1,g1079.t1,g10863.t1,g7223.t2,g306.t2,g5854.t1,g4392.t1,g7489.t1,g6240.t1,g3116.t1,g8678.t1,g8160.t1,g4092…
GO:0008150	biological_process	GO:0050896	response to stimulus	1857	g10019.t1,g7333.t2,g9739.t1,g238.t3,g4806.t1,g7108.t1,g2658.t1,g3739.t3,g10928.t2,g4225.t1,g6260.t1,g7094.t1,g3744.t2,g865.t1,g3542.t1,g306.t1,g9766.t3,g3138.t4,g995.t1,g2957.t2,g2366.t1,g7455.t1,g10297.t1,g8731.t1,g3670.t1,g1613.t1,g3963.t1,g3186.t1,g7807.t1,g878.t2,g2241.t2,g921.t2,g1723.t2,g431.t1,g5122.t1,g5799.t1,g5886.t1,g10863.t1,g7810.t1,g7223.t2,g306.t2,g5854.t1,g4392.t1,g7489.t1,g6240.t…
GO:0008150	biological_process	GO:0051179	localization	1533	g10019.t1,g3371.t1,g238.t3,g2658.t1,g7108.t1,g3739.t3,g9758.t1,g4225.t1,g7768.t2,g7094.t1,g9766.t3,g3138.t4,g7441.t2,g9472.t3,g7824.t1,g7455.t1,g6796.t1,g10297.t1,g6850.t1,g3963.t1,g878.t2,g921.t2,g2241.t2,g1723.t2,g431.t1,g5799.t1,g5886.t1,g10863.t1,g5854.t1,g3289.t1,g3360.t1,g6240.t1,g2778.t1,g3116.t1,g4092.t1,g6866.t4,g4411.t1,g1701.t1,g1109.t1,g3519.t1,g6418.t2,g799.t1,g4906.t1,g8661.t1,g8189…
GO:0008150	biological_process	GO:0000003	reproduction	850	g8784.t1,g5893.t1,g5622.t1,g2658.t1,g7709.t1,g9919.t2,g7108.t1,g3739.t3,g5852.t1,g10912.t1,g9758.t1,g4225.t1,g6260.t1,g3570.t1,g9766.t3,g9089.t2,g2002.t2,g7455.t1,g6796.t1,g10297.t1,g3540.t1,g1613.t1,g3963.t1,g2948.t3,g4076.t1,g921.t2,g6368.t1,g2444.t1,g7471.t1,g1723.t2,g1764.t1,g5122.t1,g4049.t4,g7998.t1,g1753.t1,g3336.t1,g7223.t2,g1084.t1,g7489.t1,g4392.t1,g8160.t1,g4092.t1,g6866.t4,g9570.t1,g9…
GO:0008150	biological_process	GO:0022414	reproductive process	810	g8784.t1,g5893.t1,g5622.t1,g2658.t1,g7709.t1,g9919.t2,g7108.t1,g3739.t3,g5852.t1,g10912.t1,g9758.t1,g4225.t1,g6260.t1,g3570.t1,g9766.t3,g9089.t2,g2002.t2,g7455.t1,g6796.t1,g10297.t1,g3540.t1,g1613.t1,g3963.t1,g2948.t3,g4076.t1,g921.t2,g6368.t1,g2444.t1,g7471.t1,g1723.t2,g1764.t1,g5122.t1,g4049.t4,g7998.t1,g1753.t1,g3336.t1,g7223.t2,g1084.t1,g7489.t1,g4392.t1,g8160.t1,g4092.t1,g6866.t4,g9570.t1,g9…
GO:0008150	biological_process	GO:0040011	locomotion	496	g5558.t1,g2846.t1,g4001.t1,g3344.t1,g2658.t1,g3352.t1,g7148.t1,g10616.t1,g3739.t3,g10912.t1,g9758.t1,g5575.t1,g5986.t1,g5869.t2,g2878.t1,g2302.t1,g10507.t1,g4085.t1,g306.t1,g7217.t1,g3138.t4,g7717.t1,g7450.t1,g2558.t1,g3106.t1,g6768.t1,g9470.t3,g10297.t1,g6796.t1,g3540.t1,g6258.t1,g3963.t1,g921.t2,g2241.t2,g1764.t1,g431.t1,g6258.t4,g10351.t2,g1593.t1,g3690.t3,g2447.t1,g10863.t1,g1753.t1,g3336.t1,…
GO:0008150	biological_process	GO:0042592	homeostatic process	385	g5558.t1,g2901.t1,g5395.t1,g2489.t1,g5680.t1,g3352.t1,g7177.t2,g627.t1,g7094.t1,g3138.t2,g8840.t1,g2878.t1,g10153.t1,g7770.t2,g10040.t1,g6065.t1,g5727.t1,g6768.t1,g7078.t1,g3558.t1,g3540.t1,g5987.t1,g2948.t3,g4045.t1,g878.t2,g1723.t2,g7471.t1,g10351.t2,g6552.t1,g5799.t1,g5886.t1,g6264.t3,g5878.t1,g1598.t1,g10649.t1,g2943.t2,g3411.t1,g6664.t1,g2939.t1,g7329.t1,g3276.t1,g5131.t1,g3878.t2,g8781.t1,g…
GO:0008150	biological_process	GO:0002376	immune system process	352	g9484.t1,g1065.t1,g8097.t1,g224.t1,g4001.t1,g2901.t1,g241.t1,g10612.t1,g7108.t1,g7709.t1,g2926.t3,g3352.t1,g10928.t2,g5575.t1,g4085.t1,g8840.t1,g2302.t1,g9766.t3,g10525.t1,g995.t1,g7717.t1,g7455.t1,g5541.t1,g5950.t1,g3540.t1,g2948.t3,g878.t2,g6970.t1,g10875.t1,g6696.t2,g3690.t3,g5535.t1,g1903.t1,g10446.t1,g1753.t1,g3602.t1,g4092.t1,g2319.t1,g880.t1,g96.t3,g6259.t1,g5151.t1,g7372.t1,g6812.t1,g1089…
GO:0008150	biological_process	GO:0044419	biological process involved in interspecies interaction between organisms	305	g5558.t1,g9484.t1,g1065.t1,g3371.t1,g8097.t1,g224.t1,g4001.t1,g2901.t1,g10583.t1,g2926.t3,g6217.t1,g885.t4,g4085.t1,g9766.t3,g995.t1,g7867.t1,g6767.t1,g3127.t1,g7455.t1,g10825.t1,g7807.t1,g878.t2,g6970.t1,g7471.t1,g3690.t3,g5535.t1,g1753.t1,g7223.t2,g10649.t1,g2912.t2,g6198.t1,g3116.t1,g4092.t1,g10789.t1,g2952.t1,g951.t1,g8836.t2,g551.t1,g7064.t1,g9928.t1,g8180.t2,g96.t3,g5151.t1,g1089.t1,g3213.t…
GO:0008150	biological_process	GO:0040007	growth	186	g1062.t2,g2098.t1,g2773.t1,g9573.t1,g6585.t1,g2658.t1,g3739.t3,g9346.t1,g6229.t1,g5864.t1,g6248.t1,g10507.t1,g2924.t1,g6996.t2,g7717.t1,g10832.t1,g6741.t2,g10297.t1,g2340.t1,g2948.t3,g921.t2,g2241.t2,g2444.t1,g915.t2,g6842.t2,g6966.t1,g5428.t1,g9503.t1,g3248.t1,g7998.t1,g7998.t2,g6965.t1,g4092.t1,g6866.t4,g3739.t1,g7295.t1,g3746.t1,g2427.t2,g5563.t2,g2948.t1,g10574.t1,g4523.t1,g6575.t1,g5151.t1,g…
GO:0008150	biological_process	GO:0048511	rhythmic process	67	g2098.t1,g9920.t1,g5558.t1,g10440.t1,g3138.t2,g8408.t1,g6493.t3,g9991.t2,g3630.t1,g9991.t1,g10138.t1,g6176.t1,g2098.t2,g6368.t1,g5558.t2,g4983.t1,g5428.t1,g2426.t1,g10250.t1,g10203.t1,g400.t1,g2427.t2,g7429.t1,g2674.t1,g10138.t2,g3138.t1,g7153.t1,g1780.t1,g3609.t2,g3138.t3,g7788.t1,g7140.t1,g10048.t1,g4457.t1,g10138.t3,g10030.t1,g10660.t1,g9115.t1,g3416.t1,g3630.t3,g3215.t1,g3609.t3,g1781.t1,g715…
GO:0008150	biological_process	GO:0016032	viral process	65	g1065.t1,g3073.t1,g8097.t1,g3371.t1,g2952.t2,g2901.t1,g3371.t2,g8572.t1,g4986.t2,g10771.t1,g5147.t1,g3197.t1,g426.t1,g1065.t2,g426.t2,g5140.t1,g3465.t1,g2953.t1,g7867.t1,g7455.t1,g6244.t1,g2915.t2,g7471.t1,g5518.t1,g3096.t1,g10789.t1,g2952.t1,g951.t1,g8788.t1,g7064.t1,g5626.t1,g793.t1,g111.t1,g2552.t1,g7471.t2,g5814.t1,g11007.t1,g5980.t1,g9478.t2,g6841.t1,g5419.t1,g10622.t1,g2024.t1,g8795.t1,g543…
GO:0008150	biological_process	GO:0043473	pigmentation	43	g5558.t1,g6454.t1,g2661.t1,g8097.t1,g10099.t1,g7340.t1,g10478.t2,g7797.t1,g2926.t3,g8545.t1,g10509.t1,g10880.t1,g3070.t1,g6048.t1,g6266.t1,g3197.t1,g10622.t1,g6453.t1,g3376.t2,g5172.t1,g10213.t1,g5137.t1,g1022.t1,g3376.t1,g7797.t2,g3963.t1,g2926.t2,g3534.t1,g10880.t2,g6690.t1,g5558.t2,g10478.t1,g3375.t1,g10744.t1,g5556.t1,g3116.t1,g7973.t1,g3418.t1,g2926.t1,g10203.t1,g10203.t2,g5172.t2,g3119.t1
GO:0008150	biological_process	GO:0098754	detoxification	24	g2320.t1,g2375.t1,g8781.t2,g8435.t1,g2697.t1,g7147.t2,g7405.t1,g1087.t1,g7811.t2,g6263.t1,g10383.t1,g10572.t1,g9332.t1,g7811.t1,g1017.t1,g10426.t1,g3878.t1,g10571.t1,g9508.t1,g6242.t1,g3878.t2,g8781.t1,g6129.t1,g3534.t1
GO:0008150	biological_process	GO:0051703	biological process involved in intraspecies interaction between organisms	16	g5558.t1,g10029.t1,g5558.t2,g6087.t1,g5556.t1,g10030.t1,g10880.t1,g9675.t1,g2939.t1,g2939.t2,g8853.t1,g10030.t2,g3540.t1,g10945.t1,g9675.t2,g10880.t2
GO:0005575	cellular_component	GO:0110165	cellular anatomical entity	3888	g7208.t1,g10518.t1,g7333.t2,g3925.t1,g238.t3,g5415.t3,g9739.t1,g1051.t1,g5931.t1,g2658.t1,g7108.t1,g3739.t3,g10928.t2,g1655.t1,g6260.t1,g7768.t2,g7094.t1,g5788.t1,g865.t1,g3570.t1,g10860.t1,g1118.t1,g2957.t2,g2830.t1,g7455.t1,g6796.t1,g3193.t3,g10297.t1,g1613.t1,g5501.t1,g3186.t1,g878.t2,g2241.t2,g1723.t2,g5122.t1,g5799.t1,g1079.t1,g5096.t3,g7810.t1,g1667.t3,g9957.t1,g8678.t1,g7394.t1,g8160.t1,g4…
0.t1,g62.t1,g3043.t1,g6493.t2,g6474.t2,g10650.t2,g3081.t1,g1346.t1,g2684.t1,g3475.t1,g10313.t1,g4031.t2,g8606.t2,g10823.t1,g3724.t1,g3101.t1,g10973.t2,g10930.t1,g258.t1,g361.t1,g2448.t1,g941.t1,g1598.t2,g4006.t1,g3163.t1,g8159.t1,g3421.t1,g251.t1,g6117.t2,g1893.t1,g7131.t1,g5867.t1,g6696.t1,g1679.t1,g6584.t1,g9237.t1,g7434.t1,g1075.t2,g7044.t1,g3334.t1,g6854.t2,g64.t1,g6959.t1,g5250.t1,g5628.t2,g…
GO:0005575	cellular_component	GO:0032991	protein-containing complex	1785	g10518.t1,g10019.t1,g3371.t1,g4219.t2,g238.t3,g5931.t1,g9919.t2,g7108.t1,g10928.t2,g9758.t1,g4225.t1,g6260.t1,g5788.t1,g865.t1,g3570.t1,g9766.t3,g10238.t1,g5297.t1,g995.t1,g7441.t2,g7867.t1,g7824.t1,g1641.t2,g3670.t1,g1723.t2,g2606.t1,g5122.t1,g5886.t1,g1079.t1,g7810.t1,g5854.t1,g7223.t2,g7096.t1,g7489.t1,g6240.t1,g1667.t3,g8678.t1,g8160.t1,g5636.t1,g269.t2,g8777.t2,g2279.t1,g2973.t1,g7035.t1,g17…
GO:0003674	molecular_function	GO:0005488	binding	2622	g1388.t1,g238.t3,g5931.t1,g7108.t1,g2658.t1,g3739.t3,g1655.t1,g7768.t2,g6260.t1,g7094.t1,g865.t1,g3570.t1,g2957.t2,g2830.t1,g7455.t1,g10297.t1,g3193.t3,g1613.t1,g878.t2,g2241.t2,g1723.t2,g5122.t1,g5799.t1,g1079.t1,g2148.t3,g5096.t3,g7394.t1,g8678.t1,g9957.t1,g8160.t1,g4890.t1,g8777.t2,g2846.t2,g799.t1,g3519.t1,g139.t1,g5563.t2,g10159.t1,g3878.t2,g8781.t1,g1089.t1,g6260.t2,g3683.t4,g2977.t1,g10611…
GO:0003674	molecular_function	GO:0003824	catalytic activity	1754	g10518.t1,g5415.t3,g9739.t1,g4219.t2,g238.t3,g1388.t1,g1051.t1,g4806.t1,g2658.t1,g8018.t1,g10226.t1,g7768.t2,g1655.t1,g3744.t2,g5788.t1,g865.t1,g2790.t1,g3542.t1,g10860.t1,g306.t1,g6883.t2,g3926.t1,g1118.t1,g2366.t1,g2830.t1,g7455.t1,g6796.t1,g8731.t1,g10297.t1,g3670.t1,g1613.t1,g3963.t1,g5501.t1,g7807.t1,g3186.t1,g878.t2,g921.t2,g1723.t2,g431.t1,g5799.t1,g5122.t1,g5096.t3,g5854.t1,g306.t2,g7096.…
GO:0003674	molecular_function	GO:0005215	transporter activity	335	g2832.t1,g10019.t1,g1065.t1,g8097.t1,g4623.t2,g2387.t1,g5544.t1,g7148.t1,g10616.t1,g9473.t1,g5852.t1,g7177.t2,g627.t1,g7094.t1,g5986.t1,g3138.t2,g6073.t1,g2878.t1,g6884.t2,g4007.t3,g9664.t1,g3138.t4,g7450.t1,g3558.t1,g1715.t2,g2422.t1,g3963.t1,g10814.t1,g8710.t1,g3157.t1,g10329.t3,g2444.t1,g915.t2,g5799.t1,g1748.t2,g5526.t1,g3653.t2,g5886.t1,g6264.t3,g5878.t1,g10299.t1,g3360.t1,g6198.t1,g4319.t1,…
GO:0003674	molecular_function	GO:0098772	molecular function regulator activity	326	g7321.t1,g2846.t1,g2867.t2,g4219.t2,g3158.t4,g8499.t1,g5303.t1,g241.t1,g2658.t1,g2926.t3,g10912.t1,g7094.t1,g1503.t1,g3542.t1,g3158.t2,g9470.t3,g7441.t2,g4235.t1,g3494.t1,g6258.t1,g6258.t4,g10351.t2,g3690.t3,g3316.t1,g4049.t4,g2971.t1,g3336.t1,g2778.t1,g7262.t1,g1667.t3,g2279.t1,g3198.t1,g2846.t2,g10534.t1,g10643.t1,g4120.t1,g5131.t1,g3878.t2,g4835.t1,g6812.t1,g4984.t2,g10399.t1,g8161.t1,g5759.t1…
GO:0003674	molecular_function	GO:0140110	transcription regulator activity	307	g7980.t1,g4001.t1,g586.t1,g5395.t1,g10612.t1,g3352.t1,g10928.t2,g9758.t1,g627.t1,g2149.t1,g4225.t1,g6260.t1,g6336.t5,g5621.t3,g10238.t1,g995.t1,g1641.t2,g6258.t1,g9315.t1,g6258.t4,g3033.t1,g10875.t1,g1593.t1,g3033.t4,g6043.t1,g10446.t1,g7489.t1,g6240.t1,g3602.t1,g2876.t3,g1729.t2,g3168.t1,g6205.t1,g6866.t4,g269.t2,g8453.t1,g8836.t2,g10252.t1,g9928.t1,g6749.t1,g5563.t2,g4225.t3,g6493.t1,g6333.t1,g…
GO:0003674	molecular_function	GO:0140657	ATP-dependent activity	246	g4007.t1,g2773.t1,g10282.t1,g6645.t1,g9484.t1,g1139.t1,g9573.t1,g2901.t1,g2387.t1,g6885.t1,g4986.t2,g2235.t1,g1163.t1,g5864.t1,g5869.t2,g9227.t3,g4526.t1,g5788.t1,g5140.t1,g9088.t2,g4007.t3,g5331.t1,g5993.t1,g7717.t1,g2830.t1,g6559.t1,g10405.t1,g7145.t1,g7268.t1,g5124.t1,g3963.t1,g1083.t1,g10814.t1,g5709.t1,g4045.t1,g5995.t1,g3123.t1,g915.t2,g2309.t1,g5799.t1,g3234.t1,g6966.t1,g3647.t1,g3528.t2,g…
GO:0003674	molecular_function	GO:0005198	structural molecule activity	235	g1062.t2,g6843.t2,g238.t3,g10447.t1,g345.t1,g10469.t1,g3121.t1,g241.t1,g4648.t1,g8736.t1,g3739.t3,g7070.t1,g4498.t1,g6763.t1,g6744.t2,g1777.t1,g10507.t1,g8840.t1,g9243.t1,g6342.t1,g7217.t1,g10525.t1,g5673.t1,g2542.t2,g8835.t1,g3088.t1,g3494.t1,g255.t1,g6376.t1,g3141.t1,g3038.t1,g6470.t1,g1207.t1,g2682.t2,g2682.t1,g5886.t1,g10861.t1,g5428.t1,g3248.t1,g9787.t1,g9938.t1,g10642.t1,g3336.t1,g7810.t1,g…
GO:0003674	molecular_function	GO:0060089	molecular transducer activity	85	g3016.t1,g10019.t1,g9687.t1,g10017.t1,g9339.t1,g2858.t1,g3197.t1,g4197.t1,g4662.t1,g3558.t1,g7160.t1,g3079.t1,g10046.t1,g343.t1,g1715.t2,g5161.t1,g6279.t1,g10943.t1,g10260.t1,g8426.t1,g3527.t1,g1715.t1,g2817.t1,g3946.t2,g5634.t1,g3996.t1,g9159.t1,g2876.t3,g6894.t1,g4092.t1,g10020.t1,g10203.t1,g2939.t1,g1701.t1,g10909.t2,g9142.t1,g10526.t2,g1943.t1,g10847.t1,g6292.t2,g5763.t1,g5719.t1,g3204.t1,g94…
GO:0003674	molecular_function	GO:0060090	molecular adaptor activity	69	g10043.t1,g5834.t1,g224.t1,g5619.t1,g6319.t1,g2506.t1,g3739.t3,g8572.t1,g734.t1,g3197.t1,g999.t1,g5331.t1,g10832.t1,g7506.t2,g10726.t1,g9787.t2,g7196.t1,g7506.t1,g5520.t1,g1723.t2,g4031.t3,g223.t1,g5428.t1,g5331.t2,g9787.t1,g10264.t2,g10363.t1,g6205.t1,g3739.t1,g1723.t1,g2319.t1,g3746.t1,g10832.t2,g10887.t1,g2905.t3,g3739.t2,g1089.t1,g8842.t1,g7168.t2,g10667.t3,g8842.t3,g1474.t1,g5834.t2,g10705.t…
GO:0003674	molecular_function	GO:0045182	translation regulator activity	63	g6432.t1,g2735.t1,g5814.t1,g280.t1,g5982.t1,g10784.t3,g5916.t1,g6004.t2,g1772.t2,g1391.t1,g361.t2,g939.t1,g3877.t1,g8101.t1,g3030.t1,g8450.t2,g3600.t2,g10645.t1,g9340.t1,g2527.t1,g8450.t1,g2352.t2,g2735.t2,g7096.t2,g2569.t1,g7343.t1,g361.t1,g9831.t1,g7077.t1,g3742.t1,g2980.t1,g7701.t1,g9026.t1,g10165.t1,g6966.t1,g3680.t1,g2067.t1,g7344.t1,g6357.t1,g7096.t1,g6965.t1,g3232.t1,g2352.t1,g2525.t1,g766…
GO:0003674	molecular_function	GO:0003774	cytoskeletal motor activity	34	g6984.t1,g2566.t1,g8459.t1,g10880.t1,g10278.t1,g2235.t1,g6980.t1,g8459.t2,g5869.t2,g2874.t6,g1670.t1,g6973.t1,g10416.t1,g2746.t1,g3528.t1,g2966.t2,g10880.t2,g10372.t1,g2871.t1,g8189.t2,g2233.t1,g3528.t2,g2744.t1,g2966.t1,g5869.t1,g6530.t3,g6979.t1,g6530.t2,g10819.t1,g6971.t1,g8189.t1,g2743.t1,g6530.t1,g10273.t1
GO:0003674	molecular_function	GO:0044183	protein folding chaperone	18	g2401.t1,g8217.t1,g10548.t1,g5194.t1,g1672.t1,g1157.t1,g3074.t1,g3471.t2,g5371.t1,g3470.t1,g2785.t3,g5599.t1,g4057.t1,g2401.t2,g5369.t1,g8541.t1,g8540.t1,g3471.t1
GO:0003674	molecular_function	GO:0016209	antioxidant activity	17	g2320.t1,g2375.t1,g7147.t2,g7405.t1,g1087.t1,g7811.t2,g6263.t1,g10383.t1,g10572.t1,g9332.t1,g7811.t1,g1017.t1,g10426.t1,g10571.t1,g9508.t1,g6129.t1,g3534.t1
GO:0003674	molecular_function	GO:0140104	molecular carrier activity	9	g7064.t1,g10647.t1,g6742.t1,g7113.t1,g5540.t1,g3289.t1,g7113.t2,g10733.t1,g10646.t1
GO:0003674	molecular_function	GO:0141047	molecular tag activity	8	g3213.t1,g10220.t1,g7472.t1,g4707.t1,g4704.t1,g10642.t1,g10642.t2,g2070.t1
GO:0003674	molecular_function	GO:0140223	general transcription initiation factor activity	4	g8755.t1,g6260.t2,g6039.t1,g6260.t1
GO:0003674	molecular_function	GO:0140776	protein-containing complex destabilizing activity	4	g1163.t1,g1168.t1,g9399.t1,g7717.t1
GO:0003674	molecular_function	GO:0038024	cargo receptor activity	2	g5520.t1,g5866.t1
GO:0003674	molecular_function	GO:0140299	small molecule sensor activity	2	g2366.t1,g7460.t1

## Sheet: Table S2
Table S2 Annotated KEGG pathway
KEGG_A_class	KEGG_B_class	Pathway	Count (2951)	Pathway ID	Genes	K_IDs
Cellular Processes	Transport and catabolism	Endocytosis	127	ko04144	g1895.t1;g1753.t1;g1753.t2;g1758.t1;g1524.t1;g1007.t1;g1020.t1;g1044.t1;g1061.t1;g1061.t2;g1065.t1;g1065.t2;g1065.t3;g4642.t1;g4642.t2;g1459.t1;g951.t1;g416.t1;g427.t1;g156.t1;g5400.t1;g5419.t1;g5435.t1;g5435.t2;g5520.t1;g5568.t1;g5575.t1;g5575.t2;g1642.t1;g5152.t1;g5152.t2;g5159.t1;g5159.t2;g626.t1;g626.t2;g2552.t1;g2567.t1;g2682.t1;g2682.t2;g2711.t2;g2826.t1;g2826.t2;g2962.t1;g2962.t2;g2963.t1;…	K18584+K17260+K17260+K12476+K03283+K17918+K06093+K05093+K12479+K12479+K11826+K11826+K11826+K12495+K12495+K12485+K12185+K05633+K01115+K12196+K18465+K12191+K12194+K12194+K12475+K19476+K10365+K10365+K03283+K04705+K04705+K12196+K12196+K04513+K04513+K12192+K00889+K05757+K05757+K00889+K12182+K12182+K00889+K00889+K17917+K18442+K18442+K12492+K12492+K06278+K04674+K07937+K07937+K18468+K12480+K12480+K12486+…
Cellular Processes	Cell growth and death	Cell cycle	102	ko04110	g4059.t1;g4076.t1;g4076.t3;g4293.t1;g1598.t1;g1598.t2;g1598.t3;g1613.t1;g1733.t1;g1776.t1;g1776.t2;g1776.t3;g226.t1;g226.t2;g1502.t1;g1028.t1;g1073.t1;g1083.t1;g1084.t1;g1084.t2;g1111.t1;g1111.t2;g1114.t1;g90.t1;g4647.t2;g1455.t1;g2279.t1;g4215.t1;g254.t2;g258.t1;g258.t2;g279.t1;g5321.t2;g5484.t1;g5484.t2;g5517.t1;g5545.t1;g5545.t2;g2447.t1;g5122.t1;g5144.t1;g5151.t1;g2543.t1;g2601.t3;g3026.t1;g3…	K16197+K06633+K06633+K05866+K03094+K03094+K03094+K02087+K04682+K11584+K11584+K11584+K04683+K04683+K06633+K22399+K02540+K02202+K06067+K06067+K06626+K06626+K02209+K06633+K11273+K03094+K03456+K04498+K11273+K06631+K06631+K02216+K02604+K06669+K06669+K06639+K06672+K06672+K03364+K02089+K03868+K06619+K16197+K03357+K02212+K02537+K03358+K03358+K03351+K06671+K10779+K10779+K06671+K11584+K04382+K06627+K21771+…
Cellular Processes	Transport and catabolism	Autophagy - animal	102	ko04140	g1991.t1;g1896.t1;g4960.t1;g4457.t1;g4704.t1;g4707.t1;g1503.t1;g1504.t1;g4036.t1;g4036.t2;g4929.t1;g2070.t1;g2216.t1;g2227.t1;g3776.t1;g690.t1;g2053.t1;g5348.t1;g5358.t1;g5525.t1;g2314.t1;g612.t1;g4392.t1;g5100.t1;g5156.t1;g2787.t1;g2787.t2;g2901.t1;g3009.t1;g3213.t1;g3294.t1;g3497.t1;g3497.t2;g3630.t1;g3630.t2;g3630.t3;g3661.t1;g3662.t1;g3683.t1;g3683.t2;g3683.t4;g7723.t1;g8535.t1;g8193.t1;g8202…	K00914+K16185+K10802+K04345+K04551+K04551+K10586+K07359+K06068+K06068+K01379+K04551+K01363+K16186+K01363+K21248+K01379+K08333+K07198+K08852+K10586+K02927+K07830+K08770+K02927+K08342+K08342+K08337+K08491+K08341+K01365+K03237+K03237+K04345+K04345+K04345+K00922+K00922+K04688+K04688+K04688+K01379+K01363+K04382+K16172+K07204+K01379+K01363+K06276+K06276+K18082+K04551+K04551+K07298+K04427+K17908+K02927+…
Cellular Processes	Cell growth and death	Oocyte meiosis	92	ko04114	g4059.t1;g4076.t1;g4076.t3;g4457.t1;g1598.t1;g1598.t2;g1598.t3;g1613.t1;g1776.t1;g1776.t2;g1776.t3;g1502.t1;g4022.t1;g4022.t2;g1008.t1;g1111.t1;g1111.t2;g90.t1;g1455.t1;g940.t1;g940.t2;g400.t1;g2279.t1;g258.t1;g258.t2;g5484.t1;g5484.t2;g5077.t1;g5078.t1;g5144.t1;g2543.t1;g2556.t1;g2569.t1;g2601.t3;g2759.t1;g2759.t2;g3081.t1;g3181.t1;g3181.t2;g3373.t1;g3402.t1;g3412.t1;g3422.t1;g3422.t2;g3426.t1;g…	K16197+K06633+K06633+K04345+K03094+K03094+K03094+K02087+K11584+K11584+K11584+K06633+K02183+K02183+K06269+K06626+K06626+K06633+K03094+K02183+K02183+K04373+K03456+K06631+K06631+K06669+K06669+K06269+K06269+K03868+K16197+K02183+K02602+K03357+K02183+K02183+K02537+K03358+K03358+K02183+K02183+K02183+K02183+K02183+K02183+K02183+K02183+K03351+K04345+K04345+K04345+K11584+K04382+K08045+K16197+K08049+K16197+…
Cellular Processes	Cell growth and death	Cellular senescence	84	ko04218	g1613.t1;g1723.t1;g1723.t2;g1733.t1;g4022.t1;g4022.t2;g1008.t1;g1111.t1;g1111.t2;g4509.t1;g1469.t1;g940.t1;g940.t2;g279.t1;g2043.t1;g2426.t1;g2427.t2;g4392.t1;g5077.t1;g5078.t1;g5122.t1;g2556.t1;g2759.t1;g2759.t2;g3057.t1;g3157.t1;g3173.t1;g3373.t1;g3402.t1;g3412.t1;g3422.t1;g3422.t2;g3426.t1;g3426.t2;g3452.t1;g3661.t1;g3662.t1;g9084.t1;g9084.t2;g9172.t1;g5727.t1;g5808.t1;g6283.t1;g6283.t2;g6283.…	K02087+K10866+K10866+K04682+K02183+K02183+K06269+K06626+K06626+K21776+K05863+K02183+K02183+K02216+K03982+K09408+K09408+K07830+K06269+K06269+K02089+K02183+K02183+K02183+K04851+K15040+K04674+K02183+K02183+K02183+K02183+K02183+K02183+K02183+K02183+K00922+K00922+K06627+K21771+K04500+K10865+K21773+K04443+K04443+K04443+K11411+K04348+K04348+K21771+K04371+K02183+K06269+K06268+K06268+K20858+K04500+K02087+…
Cellular Processes	Cell motility	Regulation of actin cytoskeleton	77	ko04810	g1895.t1;g4295.t1;g1609.t1;g1670.t1;g1753.t1;g1753.t2;g1369.t1;g1008.t1;g1044.t1;g4627.t1;g394.t1;g4951.t1;g2170.t1;g4835.t1;g5341.t1;g5354.t1;g2341.t1;g4392.t1;g5077.t1;g5078.t1;g1147.t1;g626.t1;g626.t2;g2567.t1;g2601.t1;g2601.t2;g2682.t1;g2682.t2;g2711.t2;g2962.t1;g2962.t2;g3112.t1;g3248.t1;g3248.t2;g3336.t1;g3336.t2;g3344.t1;g3344.t2;g3457.t1;g3506.t1;g3594.t1;g3661.t1;g3662.t1;g8130.t1;g8130.…	K18584+K05765+K05692+K10352+K17260+K17260+K04392+K06269+K05093+K04358+K04514+K04392+K04347+K05720+K05719+K04289+K05759+K07830+K06269+K06269+K04409+K04513+K04513+K00889+K05765+K05765+K05757+K05757+K00889+K00889+K00889+K04365+K05700+K05700+K05737+K05737+K05749+K05749+K05758+K04361+K07532+K00922+K00922+K05754+K05754+K06584+K05756+K05752+K05752+K05750+K04409+K04393+K04393+K10352+K10352+K06270+K06270+…
Cellular Processes	Transport and catabolism	Lysosome	76	ko04142	g1903.t1;g1903.t2;g4986.t1;g4986.t2;g3918.t1;g569.t1;g577.t1;g4929.t1;g806.t1;g915.t1;g915.t2;g915.t3;g2145.t1;g2146.t1;g2216.t1;g2237.t1;g3776.t1;g2042.t1;g2053.t1;g2425.t1;g1923.t1;g1928.t1;g1145.t1;g2613.t1;g2613.t2;g2768.t1;g2768.t2;g3294.t1;g3304.t1;g3396.t1;g3396.t2;g3396.t3;g8097.t1;g7723.t1;g8535.t1;g8203.t1;g8881.t1;g9010.t1;g9092.t1;g9133.t1;g5726.t1;g5765.t1;g5765.t2;g8266.t1;g6213.t1;…	K01444+K01444+K02144+K02144+K01206+K12305+K14410+K01379+K01052+K05656+K05656+K05656+K01201+K01201+K01363+K01201+K01363+K14410+K01379+K12389+K14379+K01369+K01158+K06129+K06129+K13289+K13289+K01365+K12387+K02154+K02154+K02154+K12391+K01379+K01363+K12311+K01379+K01158+K01363+K01206+K04646+K12384+K12384+K01201+K02146+K12399+K02154+K12393+K12394+K12397+K12397+K12350+K01363+K01379+K01373+K01074+K01074+…
Cellular Processes	Cell motility	Motor proteins	74	ko04814	g1609.t1;g1670.t1;g4628.t1;g890.t1;g1465.t1;g2233.t1;g2235.t1;g5486.t1;g5486.t2;g5575.t1;g5575.t2;g4367.t1;g1346.t1;g1346.t2;g2566.t1;g2743.t1;g2744.t1;g2746.t1;g2871.t1;g2874.t6;g2966.t1;g2966.t2;g3140.t1;g3141.t1;g3339.t1;g3528.t1;g3528.t2;g8189.t1;g8189.t2;g8375.t1;g8375.t2;g9124.t1;g5747.t1;g5860.t1;g5869.t1;g5869.t2;g6351.t1;g6376.t1;g6530.t1;g6530.t2;g6530.t3;g9491.t1;g9491.t2;g8868.t1;g886…	K05692+K10352+K10373+K10418+K07375+K10414+K10414+K10428+K10428+K10365+K10365+K10361+K10418+K10418+K10394+K17914+K10392+K10392+K20198+K12751+K10356+K10356+K07375+K07375+K10418+K10360+K10360+K20196+K20196+K05738+K05738+K07374+K12046+K10356+K10396+K10396+K10416+K07375+K10415+K10415+K10415+K16575+K16575+K10352+K10352+K05692+K10413+K10413+K10413+K10413+K10413+K07375+K10389+K07374+K10352+K05692+K10418+…
Cellular Processes	Transport and catabolism	Phagosome	65	ko04145	g1991.t1;g4986.t1;g4986.t2;g1609.t1;g1672.t1;g1213.t1;g1369.t1;g1465.t1;g4951.t1;g2233.t1;g2235.t1;g5341.t1;g2319.t1;g2684.t1;g2684.t2;g2704.t1;g2704.t2;g2826.t1;g2826.t2;g3140.t1;g3141.t1;g3294.t1;g3396.t1;g3396.t2;g3396.t3;g3543.t1;g8167.t1;g9124.t1;g8295.t1;g6213.t1;g6351.t1;g6376.t1;g6474.t1;g6474.t2;g6520.t1;g6530.t1;g6530.t2;g6530.t3;g6552.t1;g6959.t1;g6971.t1;g6972.t1;g6973.t1;g6979.t1;g69…	K00914+K02144+K02144+K05692+K08057+K09481+K04392+K07375+K04392+K10414+K10414+K05719+K08517+K02152+K02152+K10956+K10956+K12182+K12182+K07375+K07375+K01365+K02154+K02154+K02154+K02147+K08054+K07374+K08492+K02146+K10416+K07375+K02148+K02148+K02150+K10415+K10415+K10415+K02154+K05692+K10413+K10413+K10413+K10413+K10413+K07375+K07374+K03661+K03661+K05692+K08492+K08492+K05692+K02155+K02145+K02145+K02145+…
Cellular Processes	Cellular community - eukaryotes	Focal adhesion	65	ko04510	g5022.t1;g1609.t1;g1369.t1;g1008.t1;g1029.t1;g1043.t1;g1089.t1;g1457.t1;g1457.t2;g394.t1;g4951.t1;g5341.t1;g5077.t1;g5078.t1;g1147.t1;g626.t1;g626.t2;g2567.t1;g2711.t2;g2962.t1;g2962.t2;g3088.t1;g3112.t1;g3193.t1;g3193.t2;g3193.t3;g3248.t1;g3248.t2;g3506.t1;g3509.t1;g3510.t1;g3538.t1;g3661.t1;g3662.t1;g9154.t1;g9154.t2;g5833.t1;g6551.t1;g5619.t1;g9358.t1;g9478.t1;g9478.t2;g7998.t1;g7998.t2;g6760.…	K05636+K05692+K04392+K06269+K05635+K05635+K04364+K04353+K04353+K04514+K04392+K05719+K06269+K06269+K04409+K04513+K04513+K00889+K00889+K00889+K00889+K06278+K04365+K06275+K06275+K06275+K05700+K05700+K04361+K06271+K06271+K06271+K00922+K00922+K06276+K06276+K06584+K04409+K06272+K04437+K04393+K04393+K06270+K06270+K04437+K04437+K04371+K05099+K05692+K06269+K04409+K05637+K05637+K05692+K05692+K02105+K02677+…
Cellular Processes	Transport and catabolism	Mitophagy - animal	62	ko04137	g4128.t1;g4128.t2;g4704.t1;g4707.t1;g1116.t1;g4235.t1;g2070.t1;g2335.t1;g2426.t1;g2427.t2;g612.t1;g4392.t1;g5100.t1;g5140.t1;g5147.t1;g5156.t1;g2602.t1;g2658.t1;g2658.t2;g3158.t1;g3158.t2;g3158.t4;g3213.t1;g3497.t1;g3497.t2;g8788.t1;g8289.t1;g9235.t1;g9235.t2;g8029.t1;g6339.t1;g7585.t1;g5581.t1;g5643.t1;g9344.t1;g9509.t1;g9509.t2;g6711.t1;g6888.t1;g9746.t2;g9766.t1;g9766.t2;g9766.t3;g9766.t4;g105…	K17776+K17776+K04551+K04551+K03115+K19945+K04551+K17969+K09408+K09408+K02927+K07830+K08770+K13525+K13525+K02927+K04506+K05688+K05688+K20195+K20195+K20195+K08341+K03237+K03237+K13525+K11968+K04551+K04551+K07277+K17770+K07277+K17079+K06030+K17776+K02927+K02927+K13525+K07870+K15464+K08334+K08334+K08334+K08334+K17081+K17907+K02977+K02977+K04551+K04551+K04556+K04551+K08770+K05704+K07888+K07888+K02927+…
Cellular Processes	Cell growth and death	Cell cycle - yeast	61	ko04111	g4081.t1;g1598.t1;g1598.t2;g1598.t3;g1073.t1;g1114.t1;g882.t1;g1455.t1;g2279.t1;g279.t1;g5321.t2;g5484.t1;g5484.t2;g5517.t1;g5545.t1;g5545.t2;g2447.t1;g5144.t1;g2601.t3;g2692.t1;g3026.t1;g3081.t1;g3102.t1;g3181.t1;g3181.t2;g3524.t1;g3588.t1;g8453.t1;g8193.t1;g8194.t1;g8194.t2;g5780.t1;g6186.t1;g6227.t1;g5611.t1;g9342.t1;g9342.t2;g8855.t1;g6584.t1;g6584.t2;g6584.t3;g6593.t2;g6865.t1;g7014.t1;g7098…	K18669+K03094+K03094+K03094+K02540+K02209+K02219+K03094+K03456+K02216+K02604+K06669+K06669+K06639+K06672+K06672+K03364+K03868+K03357+K06685+K02212+K02537+K06675+K03358+K03358+K03351+K06671+K06671+K04382+K06685+K06685+K02213+K03350+K03094+K02365+K06674+K06674+K03364+K02541+K02541+K02541+K03355+K04371+K03868+K02180+K02216+K02216+K02216+K06675+K06675+K03347+K02603+K02603+K02603+K06636+K03349+K03349+…
Cellular Processes	Cellular community - eukaryotes	Tight junction	61	ko04530	g1889.t1;g1895.t1;g4457.t1;g1609.t1;g1670.t1;g1753.t1;g1753.t2;g1369.t1;g229.t1;g1020.t1;g1457.t1;g1457.t2;g394.t1;g413.t1;g4951.t1;g2098.t1;g2098.t2;g2229.t1;g2279.t1;g5332.t1;g5341.t1;g5358.t1;g2364.t1;g2364.t2;g5122.t1;g626.t1;g626.t2;g2682.t1;g2682.t2;g2738.t1;g2874.t6;g3057.t1;g3198.t1;g3457.t1;g3568.t1;g3630.t1;g3630.t2;g3630.t3;g8130.t1;g8130.t2;g8193.t1;g9124.t1;g9243.t1;g6239.t1;g6428.t1…	K07200+K18584+K04345+K05692+K10352+K17260+K17260+K04392+K06100+K06093+K04353+K04353+K04514+K07902+K04392+K12076+K12076+K07199+K03456+K06099+K05719+K07198+K06095+K06095+K02089+K04513+K04513+K05757+K05757+K04426+K12751+K04851+K08018+K05758+K16684+K04345+K04345+K04345+K05754+K05754+K04382+K07374+K05756+K07298+K04802+K04393+K04393+K10352+K10352+K05692+K07374+K18050+K10352+K05692+K09183+K02089+K05692+…
Cellular Processes	Transport and catabolism	Autophagy - yeast	55	ko04138	g1991.t1;g1895.t1;g4457.t1;g1753.t1;g1753.t2;g4031.t1;g4031.t2;g4031.t3;g1061.t1;g1061.t2;g4635.t1;g283.t2;g5348.t1;g2682.t1;g2682.t2;g2787.t1;g2787.t2;g2901.t1;g2944.t1;g3158.t1;g3158.t2;g3158.t4;g3213.t1;g3457.t1;g3497.t1;g3497.t2;g3630.t1;g3630.t2;g3630.t3;g8130.t1;g8130.t2;g8193.t1;g8206.t1;g9090.t1;g9243.t1;g9335.t1;g7803.t1;g6780.t1;g7333.t1;g7333.t2;g9766.t1;g9766.t2;g9766.t3;g9766.t4;g105…	K00914+K18584+K04345+K17260+K17260+K08493+K08493+K08493+K12479+K12479+K18083+K00915+K08333+K05757+K05757+K08342+K08342+K08337+K07756+K20195+K20195+K20195+K08341+K05758+K03237+K03237+K04345+K04345+K04345+K05754+K05754+K04382+K07204+K00654+K05756+K17908+K06027+K08269+K17607+K17607+K08334+K08334+K08334+K08334+K17907+K15296+K07203+K08331+K15296+K15296+K20181+K00654+K07827+K07827+K20184
Cellular Processes	Cell growth and death	Meiosis - yeast	54	ko04113	g4457.t1;g1776.t1;g1776.t2;g1776.t3;g1008.t1;g1073.t1;g1114.t1;g770.t1;g2279.t1;g279.t1;g5321.t2;g5484.t1;g5484.t2;g5517.t1;g5077.t1;g5078.t1;g2601.t3;g3026.t1;g3081.t1;g3181.t1;g3181.t2;g3507.t1;g3524.t1;g3588.t1;g3630.t1;g3630.t2;g3630.t3;g8453.t1;g8498.t1;g8193.t1;g5780.t1;g6186.t1;g5611.t1;g6584.t1;g6584.t2;g6584.t3;g6593.t2;g7155.t1;g7321.t1;g9661.t1;g9661.t2;g9661.t3;g10695.t1;g9980.t1;g998…	K04345+K11584+K11584+K11584+K06269+K02540+K02209+K12771+K03456+K02216+K02604+K06669+K06669+K06639+K06269+K06269+K03357+K02212+K02537+K03358+K03358+K12771+K03351+K06671+K04345+K04345+K04345+K06671+K11584+K04382+K02213+K03350+K02365+K02541+K02541+K02541+K03355+K06269+K11584+K02216+K02216+K02216+K07203+K02603+K02603+K02603+K06636+K03349+K03349+K02542+K07827+K07827+K02178+K02210
Cellular Processes	Cell motility	Cytoskeleton in muscle cells	54	ko04820	g1609.t1;g1670.t1;g3993.t1;g3993.t2;g4013.t1;g4013.t2;g4013.t3;g4033.t1;g4033.t2;g4033.t3;g3914.t1;g3914.t2;g4628.t1;g1451.t1;g735.t1;g2035.t1;g2035.t2;g5341.t1;g5575.t1;g5575.t2;g1149.t1;g2773.t1;g3248.t1;g3248.t2;g3509.t1;g3510.t1;g3538.t1;g8448.t1;g8375.t1;g8375.t2;g5747.t1;g5833.t1;g8868.t1;g8869.t1;g7773.t1;g6594.t1;g6695.t1;g6695.t2;g6959.t1;g7157.t1;g7295.t1;g7318.t1;g7377.t1;g7409.t1;g746…	K05692+K10352+K01689+K01689+K12567+K12567+K12567+K17307+K17307+K17307+K01490+K01490+K10373+K06255+K01539+K12567+K12567+K05719+K10365+K10365+K01539+K01539+K05700+K05700+K06271+K06271+K06271+K12563+K05738+K05738+K12046+K06584+K10352+K10352+K07611+K01540+K08573+K08573+K05692+K06115+K04512+K10352+K05637+K05637+K05692+K12045+K12045+K05692+K06115+K06115+K19347+K12565+K01539+K10364
Cellular Processes	Cell growth and death	Apoptosis	53	ko04210	g1609.t1;g1612.t1;g1018.t1;g1037.t1;g4929.t1;g4641.t1;g4641.t2;g2216.t1;g3776.t1;g2053.t1;g5498.t1;g5525.t1;g5536.t1;g2738.t1;g2839.t1;g3294.t1;g3497.t1;g3497.t2;g3661.t1;g3662.t1;g7723.t1;g8535.t1;g8881.t1;g9092.t1;g9124.t1;g9154.t1;g9154.t2;g7773.t1;g6702.t1;g6865.t1;g6898.t1;g6959.t1;g7003.t1;g7104.t1;g7162.t1;g7429.t1;g7431.t1;g7431.t2;g7455.t1;g7469.t1;g9643.t1;g9781.t1;g9791.t1;g9793.t1;g10…	K05692+K08731+K10798+K01173+K01379+K10798+K10798+K01363+K01363+K01379+K08731+K08852+K08731+K04426+K08738+K01365+K03237+K03237+K00922+K00922+K01379+K01363+K01379+K01363+K07374+K06276+K06276+K07611+K01363+K04371+K01379+K05692+K07374+K01373+K04734+K04958+K04958+K04958+K01363+K05692+K01379+K05692+K01379+K01379+K07374+K04456+K01363+K07827+K07827+K02084+K02084+K01365+K04456
Cellular Processes	Cellular community - eukaryotes	Gap junction	53	ko04540	g4457.t1;g1613.t1;g1089.t1;g1465.t1;g5354.t1;g2366.t1;g2491.t1;g2846.t1;g2846.t2;g2926.t1;g2926.t2;g2926.t3;g3140.t1;g3141.t1;g3230.t1;g3506.t1;g3630.t1;g3630.t2;g3630.t3;g9017.t1;g9124.t1;g5839.t1;g6376.t1;g6865.t1;g6983.t1;g7003.t1;g7286.t1;g7389.t1;g7426.t1;g7426.t2;g7429.t1;g7431.t1;g7431.t2;g7460.t1;g7490.t1;g7490.t2;g10908.t1;g10908.t2;g10909.t2;g10926.t1;g10056.t1;g10056.t2;g10157.t1;g1020…	K04345+K02087+K04364+K07375+K04289+K12319+K04603+K07376+K07376+K04634+K04634+K04634+K07375+K07375+K07376+K04361+K04345+K04345+K04345+K08045+K07374+K08049+K07375+K04371+K07375+K07374+K08959+K02087+K02087+K02087+K04958+K04958+K04958+K12319+K05858+K05858+K02677+K02677+K04144+K07374+K04632+K04632+K05704+K04145+K04145+K03099+K08959+K05858+K05858+K05858+K07827+K07827+K08042
Cellular Processes	Cellular community - eukaryotes	Signaling pathways regulating pluripotency of stem cells	49	ko04550	g4092.t1;g1044.t1;g1069.t1;g1069.t2;g1069.t3;g1089.t1;g2296.t1;g2354.t1;g3097.t1;g3097.t2;g3661.t1;g3662.t1;g3739.t1;g3739.t2;g3739.t3;g3746.t1;g7808.t1;g8181.t1;g8181.t2;g9172.t1;g5826.t1;g6258.t1;g6258.t2;g6258.t3;g6258.t4;g6348.t1;g6540.t1;g5622.t1;g5622.t2;g9421.t1;g9421.t2;g9501.t1;g6833.t1;g6865.t1;g7302.t1;g9687.t1;g9788.t1;g10654.t1;g10910.t1;g10976.t1;g10988.t1;g10988.t2;g10234.t1;g10399…	K13578+K05093+K09326+K09326+K09326+K04364+K08031+K00408+K11488+K11488+K00922+K00922+K02353+K02353+K02353+K02353+K04676+K00408+K00408+K04500+K14439+K18499+K18499+K18499+K18499+K01384+K00444+K04676+K04676+K04501+K04501+K18484+K10177+K04371+K04500+K02432+K04441+K02105+K04362+K04456+K04501+K04501+K09326+K07827+K07827+K04662+K09378+K09378+K04456
Cellular Processes	Cellular community - eukaryotes	Adherens junction	47	ko04520	g1609.t1;g3822.t1;g1671.t1;g1773.t1;g1773.t2;g1369.t1;g1383.t1;g1116.t1;g1457.t1;g1457.t2;g394.t1;g4951.t1;g4215.t1;g5264.t1;g5267.t1;g626.t1;g626.t2;g3051.t1;g3051.t2;g3051.t3;g3173.t1;g3248.t1;g3248.t2;g3506.t1;g8986.t1;g5854.t1;g6262.t1;g6495.t1;g9421.t1;g9421.t2;g9478.t1;g9478.t2;g6707.t1;g6865.t1;g6894.t1;g6959.t1;g7469.t1;g9781.t1;g10654.t1;g10788.t1;g10910.t1;g10988.t1;g10988.t2;g10157.t1;…	K05692+K04468+K05691+K06085+K06085+K04392+K18269+K03115+K04353+K04353+K04514+K04392+K04498+K05694+K05694+K04513+K04513+K14394+K14394+K14394+K04674+K05700+K05700+K04361+K04491+K04468+K04427+K05695+K04501+K04501+K04393+K04393+K06082+K04371+K05099+K05692+K05692+K05692+K02105+K04527+K04362+K04501+K04501+K05704+K04392+K03097+K08889
Cellular Processes	Transport and catabolism	Efferocytosis	45	ko04148	g1672.t1;g1369.t1;g878.t1;g878.t2;g880.t1;g806.t1;g392.t1;g428.t1;g4951.t1;g4711.t1;g4671.t1;g5420.t1;g5511.t1;g2352.t1;g2352.t2;g2613.t1;g2613.t2;g3007.t1;g3007.t3;g3357.t1;g3542.t1;g8365.t1;g5812.t1;g8269.t1;g8269.t2;g6283.t1;g6283.t2;g6283.t3;g6387.t1;g6493.t3;g6856.t1;g6865.t1;g7237.t1;g7243.t1;g9675.t1;g9675.t2;g9788.t1;g10146.t1;g10297.t1;g10297.t2;g10441.t1;g10441.t2;g10467.t1;g5993.t1;g60…	K08057+K04392+K07881+K07881+K07881+K01052+K06704+K19499+K04392+K07299+K07299+K08765+K04459+K08524+K08524+K06129+K06129+K04459+K04459+K06834+K13302+K00411+K05853+K07299+K07299+K04443+K04443+K04443+K11411+K05870+K09355+K04371+K04718+K07293+K09097+K09097+K04441+K20181+K07888+K07888+K01581+K01581+K04392+K14802+K20184
Cellular Processes	Transport and catabolism	Peroxisome	38	ko04146	g4456.t1;g4456.t2;g4458.t1;g3910.t1;g5426.t1;g2375.t1;g2387.t1;g5146.t1;g2815.t2;g3225.t1;g3225.t2;g3225.t3;g3229.t1;g3229.t2;g3390.t1;g3390.t2;g3442.t1;g3442.t2;g5769.t1;g6430.t1;g6431.t1;g7598.t1;g7598.t2;g9378.t1;g9378.t2;g9463.t1;g6656.t1;g6687.t1;g6688.t1;g6850.t4;g6869.t1;g6869.t2;g7147.t2;g7234.t1;g10778.t1;g10858.t1;g11064.t1;g6129.t1	K00272+K00272+K00272+K01897+K12663+K04565+K05677+K00869+K13342+K00106+K00106+K00106+K00031+K00031+K08764+K08764+K13344+K13344+K00232+K00477+K00477+K00869+K00869+K01640+K01640+K11147+K00031+K00624+K00624+K13349+K12405+K12405+K04565+K05678+K00803+K01897+K00649+K03781
Cellular Processes	Cell growth and death	Necroptosis	36	ko04217	g1868.t1;g1888.t1;g4960.t1;g1602.t1;g1611.t1;g359.t1;g359.t2;g363.t1;g1136.t1;g1469.t1;g5039.t1;g3956.t1;g156.t1;g5419.t1;g5435.t1;g5435.t2;g5159.t1;g5159.t2;g2467.t1;g2484.t1;g2552.t1;g2904.t1;g2904.t2;g2904.t3;g3157.t1;g3371.t1;g3371.t2;g3465.t1;g8499.t1;g8652.t1;g6244.t1;g6652.t1;g7471.t1;g7471.t2;g9859.t1;g6120.t1	K00522+K01915+K10802+K11251+K11251+K04079+K04079+K11251+K00522+K05863+K00261+K04079+K12196+K12191+K12194+K12194+K12196+K12196+K11251+K11251+K12192+K17065+K17065+K17065+K15040+K12198+K12198+K15053+K17065+K11251+K12197+K12350+K12194+K12194+K11251+K00688
Cellular Processes	Cell growth and death	Apoptosis - fly	28	ko04214	g1772.t1;g1772.t2;g1503.t1;g921.t1;g921.t2;g2314.t1;g2738.t1;g2793.t1;g2839.t1;g2904.t1;g2904.t2;g2904.t3;g3112.t1;g3506.t1;g8499.t1;g6262.t1;g5643.t1;g7773.t1;g6865.t1;g6888.t1;g10630.t1;g10762.t1;g10963.t1;g10963.t2;g10399.t1;g10399.t2;g6092.t1;g6092.t2	K03262+K03262+K10586+K04412+K04412+K10586+K04426+K16686+K08738+K17065+K17065+K17065+K04365+K04361+K17065+K04427+K06030+K07611+K04371+K07870+K08791+K09428+K01527+K01527+K07827+K07827+K02084+K02084
Cellular Processes	Transport and catabolism	Mitophagy - yeast	25	ko04139	g1116.t1;g2335.t1;g2567.t1;g2711.t2;g2904.t1;g2904.t2;g2904.t3;g2962.t1;g2962.t2;g3213.t1;g8499.t1;g5742.t2;g5743.t1;g5800.t3;g5668.t1;g9511.t1;g6780.t1;g9758.t1;g9758.t2;g9788.t1;g10695.t1;g10908.t1;g10908.t2;g11040.t1;g5921.t1	K03115+K17969+K00889+K00889+K17065+K17065+K17065+K00889+K00889+K08341+K17065+K08955+K08955+K08294+K02332+K11088+K08269+K11644+K11644+K04441+K07203+K02677+K02677+K17800+K03097
Cellular Processes	Cell growth and death	p53 signaling pathway	21	ko04115	g1613.t1;g1751.t1;g1111.t1;g1111.t2;g279.t1;g2043.t1;g5122.t1;g2602.t1;g2839.t1;g9068.t1;g7389.t1;g7426.t1;g7426.t2;g9661.t1;g9661.t2;g9661.t3;g9704.t1;g9704.t2;g9778.t1;g6092.t1;g6092.t2	K02087+K10134+K06626+K06626+K02216+K03982+K02089+K04506+K08738+K10147+K02087+K02087+K02087+K02216+K02216+K02216+K10143+K10143+K02089+K02084+K02084
Cellular Processes	Transport and catabolism	Autophagy - other	18	ko04136	g1991.t1;g5348.t1;g2787.t1;g2787.t2;g2901.t1;g3213.t1;g8193.t1;g8206.t1;g9335.t1;g6780.t1;g9766.t1;g9766.t2;g9766.t3;g9766.t4;g10591.t1;g10695.t1;g10806.t1;g10327.t1	K00914+K08333+K08342+K08342+K08337+K08341+K04382+K07204+K17908+K08269+K08334+K08334+K08334+K08334+K17907+K07203+K08331+K19730
Cellular Processes	Cell growth and death	Ferroptosis	14	ko04216	g1868.t1;g3910.t1;g1136.t1;g1483.t1;g1483.t2;g5521.t1;g2537.t1;g2537.t2;g2697.t1;g2901.t1;g3157.t1;g5606.t1;g6664.t1;g10858.t1	K00522+K01897+K00522+K21456+K21456+K11204+K00657+K00657+K11205+K08337+K15040+K13515+K14714+K01897
Cellular Processes	Cell growth and death	Apoptosis - multiple species	12	ko04215	g1612.t1;g1503.t1;g5498.t1;g5536.t1;g2314.t1;g2839.t1;g9766.t1;g9766.t2;g9766.t3;g9766.t4;g6092.t1;g6092.t2	K08731+K10586+K08731+K08731+K10586+K08738+K08334+K08334+K08334+K08334+K02084+K02084
Cellular Processes	Cellular community - prokaryotes	Quorum sensing	8	ko02024	g3910.t1;g2715.t1;g9559.t1;g9560.t1;g6216.t1;g6216.t2;g9670.t1;g10858.t1	K01897+K03106+K03070+K03070+K03217+K03217+K01728+K01897
Cellular Processes	Cell growth and death	Cell cycle - Caulobacter	4	ko04112	g1484.t1;g2964.t1;g9557.t1;g9572.t1	K01358+K03544+K01338+K01338
Cellular Processes	Cellular community - prokaryotes	Biofilm formation - Escherichia coli	1	ko02026	g6120.t1	K00688
Environmental Information Processing	Signal transduction	Rap1 signaling pathway	103	ko04015	g1988.t1;g1609.t1;g1701.t1;g1369.t1;g4022.t1;g4022.t2;g1020.t1;g1044.t1;g4627.t1;g885.t1;g885.t2;g885.t3;g885.t4;g661.t1;g1457.t1;g1457.t2;g940.t1;g940.t2;g4951.t1;g5341.t1;g5354.t1;g2297.t1;g2341.t1;g2394.t1;g626.t1;g626.t2;g2508.t1;g2556.t1;g2759.t1;g2759.t2;g2926.t1;g2926.t2;g2926.t3;g3112.t1;g3198.t1;g3373.t1;g3402.t1;g3412.t1;g3422.t1;g3422.t2;g3426.t1;g3426.t2;g3452.t1;g3506.t1;g3509.t1;g35…	K04534+K05692+K05209+K04392+K02183+K02183+K06093+K05093+K04358+K04534+K04534+K04534+K04534+K04534+K04353+K04353+K02183+K02183+K04392+K05719+K04289+K08732+K05759+K01116+K04513+K04513+K17701+K02183+K02183+K02183+K04634+K04634+K04634+K04365+K08018+K02183+K02183+K02183+K02183+K02183+K02183+K02183+K02183+K04361+K06271+K06271+K06271+K00922+K00922+K08045+K07834+K08049+K04534+K04534+K04534+K04393+K04393+…
Environmental Information Processing	Signal transduction	MAPK signaling pathway	96	ko04010	g4293.t1;g4457.t1;g3822.t1;g1369.t1;g1524.t1;g1044.t1;g1089.t1;g4627.t1;g1457.t1;g1457.t2;g921.t1;g921.t2;g400.t1;g4951.t1;g2170.t1;g5511.t1;g1642.t1;g4392.t1;g1147.t1;g2738.t1;g2841.t1;g2841.t2;g3007.t1;g3007.t3;g3057.t1;g3112.t1;g3173.t1;g3198.t1;g3460.t1;g3506.t1;g3630.t1;g3630.t2;g3630.t3;g3675.t1;g3675.t2;g8418.t1;g9056.t1;g9080.t1;g9080.t2;g5720.t1;g5804.t1;g5850.t1;g5854.t1;g6262.t1;g6283.…	K05866+K04345+K04468+K04392+K03283+K05093+K04364+K04358+K04353+K04353+K04412+K04412+K04373+K04392+K04347+K04459+K03283+K07830+K04409+K04426+K04405+K04405+K04459+K04459+K04851+K04365+K04674+K08018+K04863+K04361+K04345+K04345+K04345+K04380+K04380+K04460+K04453+K03283+K03283+K05866+K04407+K04465+K04468+K04427+K04443+K04443+K04443+K04445+K04445+K04445+K04348+K04348+K04409+K04372+K04372+K04437+K04393+…
Environmental Information Processing	Signal transduction	cAMP signaling pathway	96	ko04024	g4457.t1;g1701.t1;g1274.t1;g1369.t1;g4022.t1;g4022.t2;g1008.t1;g1457.t1;g1457.t2;g940.t1;g940.t2;g735.t1;g394.t1;g427.t1;g4951.t1;g4215.t1;g306.t1;g306.t2;g5482.t1;g5512.t1;g5513.t1;g2407.t1;g4392.t1;g5077.t1;g5078.t1;g1147.t1;g1149.t1;g626.t1;g626.t2;g2556.t1;g2759.t1;g2759.t2;g2773.t1;g3057.t1;g3079.t1;g3112.t1;g3204.t1;g3238.t1;g3373.t1;g3402.t1;g3412.t1;g3422.t1;g3422.t2;g3426.t1;g3426.t2;g34…	K04345+K05209+K07188+K04392+K02183+K02183+K06269+K04353+K04353+K02183+K02183+K01539+K04514+K01115+K04392+K04498+K18438+K18438+K06225+K13293+K06225+K19021+K07830+K06269+K06269+K04409+K01539+K04513+K04513+K02183+K02183+K02183+K01539+K04851+K04153+K04365+K04615+K05850+K02183+K02183+K02183+K02183+K02183+K02183+K02183+K02183+K04345+K04345+K04345+K00922+K00922+K08045+K04153+K00232+K05853+K08049+K13293+…
Environmental Information Processing	Signal transduction	Ras signaling pathway	89	ko04014	g1908.t1;g4457.t1;g1701.t1;g1369.t1;g4022.t1;g4022.t2;g1044.t1;g1089.t1;g4627.t1;g1457.t1;g1457.t2;g1460.t1;g1463.t1;g940.t1;g940.t2;g427.t1;g4951.t1;g2170.t1;g5262.t1;g5262.t2;g2297.t1;g2394.t1;g4342.t1;g4342.t2;g4392.t1;g5151.t1;g1147.t1;g626.t1;g626.t2;g2556.t1;g2759.t1;g2759.t2;g3373.t1;g3402.t1;g3412.t1;g3422.t1;g3422.t2;g3426.t1;g3426.t2;g3452.t1;g3506.t1;g3630.t1;g3630.t2;g3630.t3;g3661.t1…	K04539+K04345+K05209+K04392+K02183+K02183+K05093+K04364+K04358+K04353+K04353+K04536+K04536+K02183+K02183+K01115+K04392+K04347+K10632+K10632+K08732+K01116+K01047+K01047+K07830+K06619+K04409+K04513+K04513+K02183+K02183+K02183+K02183+K02183+K02183+K02183+K02183+K02183+K02183+K02183+K04361+K04345+K04345+K04345+K00922+K00922+K17637+K17637+K17637+K01047+K01047+K08773+K08773+K07834+K04409+K14958+K14958+…
Environmental Information Processing	Signal transduction	Calcium signaling pathway	89	ko04020	g4457.t1;g1701.t1;g1748.t1;g1748.t2;g4022.t1;g4022.t2;g1044.t1;g4627.t1;g1469.t1;g940.t1;g940.t2;g5282.t1;g2394.t1;g5131.t1;g5166.t1;g2491.t1;g2556.t1;g2759.t1;g2759.t2;g2844.t1;g2926.t1;g2926.t2;g2926.t3;g2939.t1;g2939.t2;g3057.t1;g3156.t1;g3156.t2;g3157.t1;g3238.t1;g3373.t1;g3402.t1;g3412.t1;g3422.t1;g3422.t2;g3426.t1;g3426.t2;g3452.t1;g3506.t1;g3527.t1;g3630.t1;g3630.t2;g3630.t3;g5812.t1;g5839…	K04345+K05209+K05849+K05849+K02183+K02183+K05093+K04358+K05863+K02183+K02183+K04994+K01116+K16059+K16059+K04603+K02183+K02183+K02183+K08794+K04634+K04634+K04634+K04135+K04135+K04851+K05857+K05857+K15040+K05850+K02183+K02183+K02183+K02183+K02183+K02183+K02183+K02183+K04361+K04282+K04345+K04345+K04345+K05853+K08049+K07190+K04348+K04348+K04849+K07190+K07190+K07190+K07190+K04854+K05099+K02183+K06268+…
Environmental Information Processing	Signal transduction	cGMP-PKG signaling pathway	87	ko04022	g1748.t1;g1748.t2;g4022.t1;g4022.t2;g1008.t1;g1469.t1;g940.t1;g940.t2;g735.t1;g394.t1;g2366.t1;g2407.t1;g5077.t1;g5078.t1;g1149.t1;g626.t1;g626.t2;g2556.t1;g2759.t1;g2759.t2;g2773.t1;g2846.t1;g2846.t2;g2926.t1;g2926.t2;g2926.t3;g2939.t1;g2939.t2;g3016.t1;g3057.t1;g3138.t1;g3138.t2;g3138.t3;g3138.t4;g3157.t1;g3230.t1;g3238.t1;g3373.t1;g3402.t1;g3412.t1;g3422.t1;g3422.t2;g3426.t1;g3426.t2;g3452.t1;…	K05849+K05849+K02183+K02183+K06269+K05863+K02183+K02183+K01539+K04514+K12319+K19021+K06269+K06269+K01539+K04513+K04513+K02183+K02183+K02183+K01539+K07376+K07376+K04634+K04634+K04634+K04135+K04135+K04139+K04851+K04936+K04936+K04936+K04936+K15040+K07376+K05850+K02183+K02183+K02183+K02183+K02183+K02183+K02183+K02183+K16172+K08045+K05853+K08049+K12323+K05870+K04348+K04348+K06270+K06270+K04952+K04952+…
Environmental Information Processing	Signal transduction	Apelin signaling pathway	80	ko04371	g1991.t1;g1889.t1;g1908.t1;g4457.t1;g1748.t1;g1748.t2;g1274.t1;g4022.t1;g4022.t2;g1460.t1;g1463.t1;g940.t1;g940.t2;g2170.t1;g2229.t1;g2043.t1;g5348.t1;g5358.t1;g4392.t1;g2556.t1;g2759.t1;g2759.t2;g2926.t1;g2926.t2;g2926.t3;g3173.t1;g3373.t1;g3402.t1;g3412.t1;g3422.t1;g3422.t2;g3426.t1;g3426.t2;g3452.t1;g3630.t1;g3630.t2;g3630.t3;g3683.t1;g3683.t2;g3683.t4;g9017.t1;g9172.t1;g5839.t1;g9421.t1;g9421…	K00914+K07200+K04539+K04345+K05849+K05849+K07188+K02183+K02183+K04536+K04536+K02183+K02183+K04347+K07199+K03982+K08333+K07198+K07830+K02183+K02183+K02183+K04634+K04634+K04634+K04674+K02183+K02183+K02183+K02183+K02183+K02183+K02183+K02183+K04345+K04345+K04345+K04688+K04688+K04688+K08045+K04500+K08049+K04501+K04501+K02991+K04371+K02183+K04718+K18050+K04500+K11406+K04958+K04958+K04958+K05858+K05858+…
Environmental Information Processing	Signal transduction	PI3K-Akt signaling pathway	78	ko04151	g4059.t1;g1908.t1;g5022.t1;g1776.t1;g1776.t2;g1776.t3;g1369.t1;g359.t1;g359.t2;g1029.t1;g1043.t1;g1044.t1;g1089.t1;g1111.t1;g1111.t2;g4627.t1;g1460.t1;g1463.t1;g933.t1;g4951.t1;g2170.t1;g2279.t1;g3956.t1;g5333.t1;g5333.t2;g5341.t1;g5354.t1;g5358.t1;g2343.t1;g2352.t1;g2352.t2;g2426.t1;g2427.t2;g5122.t1;g2535.t1;g2543.t1;g2735.t1;g2735.t2;g3506.t1;g3542.t1;g3572.t1;g3661.t1;g3662.t1;g3683.t1;g3683.…	K16197+K04539+K05636+K11584+K11584+K11584+K04392+K04079+K04079+K05635+K05635+K05093+K04364+K06626+K06626+K04358+K04536+K04536+K03259+K04392+K04347+K03456+K04079+K09554+K09554+K05719+K04289+K07198+K06071+K08524+K08524+K09408+K09408+K02089+K11583+K16197+K03259+K03259+K04361+K13302+K00693+K00922+K00922+K04688+K04688+K04688+K11584+K04382+K16172+K07204+K06276+K06276+K16197+K06584+K04465+K16197+K07298+…
Environmental Information Processing	Signal transduction	Phosphatidylinositol signaling system	72	ko04070	g1991.t1;g4114.t1;g1245.t1;g4022.t1;g4022.t2;g4635.t1;g940.t1;g940.t2;g732.t1;g732.t2;g417.t1;g283.t2;g2394.t1;g2435.t1;g2556.t1;g2558.t1;g2567.t1;g2579.t1;g2579.t2;g2579.t3;g2711.t2;g2759.t1;g2759.t2;g2778.t1;g2944.t1;g2962.t1;g2962.t2;g3082.t1;g3082.t2;g3156.t1;g3156.t2;g3160.t1;g3373.t1;g3402.t1;g3412.t1;g3422.t1;g3422.t2;g3426.t1;g3426.t2;g3452.t1;g3661.t1;g3662.t1;g5724.t1;g6261.t1;g6433.t1;…	K00914+K00888+K21797+K02183+K02183+K18083+K02183+K02183+K18081+K18081+K21798+K00915+K01116+K00901+K02183+K21797+K00889+K20278+K20278+K20278+K00889+K02183+K02183+K01099+K07756+K00889+K00889+K00981+K00981+K05857+K05857+K00999+K02183+K02183+K02183+K02183+K02183+K02183+K02183+K02183+K00922+K00922+K18082+K01092+K01109+K20279+K00888+K00901+K00901+K00901+K02183+K04958+K04958+K04958+K05858+K05858+K02183+…
Environmental Information Processing	Signal transduction	mTOR signaling pathway	66	ko04150	g4049.t1;g4049.t2;g4049.t3;g4049.t4;g4049.t5;g1896.t1;g4986.t1;g4986.t2;g1085.t1;g1089.t1;g933.t1;g400.t1;g2227.t1;g5358.t1;g2354.t1;g626.t1;g626.t2;g2684.t1;g2684.t2;g2735.t1;g2735.t2;g3112.t1;g3542.t1;g3543.t1;g3661.t1;g3662.t1;g3683.t1;g3683.t2;g3683.t4;g3739.t1;g3739.t2;g3739.t3;g3746.t1;g8181.t1;g8181.t2;g8202.t1;g8206.t1;g9154.t1;g9154.t2;g6239.t1;g6348.t1;g6474.t1;g6474.t2;g6520.t1;g6540.t…	K20404+K20404+K20404+K20404+K20404+K16185+K02144+K02144+K08272+K04364+K03259+K04373+K16186+K07198+K00408+K04513+K04513+K02152+K02152+K03259+K03259+K04365+K13302+K02147+K00922+K00922+K04688+K04688+K04688+K02353+K02353+K02353+K02353+K00408+K00408+K16172+K07204+K06276+K06276+K07298+K01384+K02148+K02148+K02150+K00444+K02991+K08269+K14004+K14004+K04371+K02432+K07203+K04527+K02145+K02145+K02145+K02677+…
Environmental Information Processing	Signal transduction	Wnt signaling pathway	65	ko04310	g4457.t1;g1598.t1;g1598.t2;g1598.t3;g3822.t1;g1369.t1;g1116.t1;g875.t1;g1455.t1;g918.t1;g927.t1;g4951.t1;g4215.t1;g2354.t1;g5144.t1;g626.t1;g626.t2;g2602.t1;g2644.t3;g2902.t1;g3521.t1;g3630.t1;g3630.t2;g3630.t3;g3739.t1;g3739.t2;g3739.t3;g3746.t1;g8166.t1;g8181.t1;g8181.t2;g8986.t1;g5854.t1;g9231.t1;g6227.t1;g6248.t1;g6262.t1;g6348.t1;g6387.t1;g6540.t1;g6549.t1;g6549.t2;g9421.t1;g9421.t2;g7014.t1…	K04345+K03094+K03094+K03094+K04468+K04392+K03115+K04496+K03094+K04497+K05128+K04392+K04498+K00408+K03868+K04513+K04513+K04506+K00181+K02166+K08957+K04345+K04345+K04345+K02353+K02353+K02353+K02353+K04511+K00408+K00408+K04491+K04468+K04499+K03094+K08399+K04427+K01384+K11411+K00444+K04348+K04348+K04501+K04501+K03868+K06268+K06268+K04512+K05858+K05858+K02432+K06268+K06268+K02105+K04510+K02677+K02677+…
Environmental Information Processing	Signal transduction	Hippo signaling pathway	63	ko04390	g4059.t1;g4092.t1;g1609.t1;g1612.t1;g1671.t1;g1008.t1;g1020.t1;g921.t1;g921.t2;g4221.t1;g4225.t1;g4225.t2;g4225.t3;g2098.t1;g2098.t2;g2279.t1;g2043.t1;g5498.t1;g5536.t1;g2354.t1;g5077.t1;g5078.t1;g2543.t1;g2692.t1;g2793.t1;g3173.t1;g3568.t1;g3739.t1;g3739.t2;g3739.t3;g3746.t1;g7808.t1;g8181.t1;g8181.t2;g8193.t1;g8194.t1;g8194.t2;g8986.t1;g9172.t1;g5695.t1;g8611.t1;g9230.t1;g6240.t1;g6348.t1;g6540…	K16197+K13578+K05692+K08731+K05691+K06269+K06093+K04412+K04412+K16682+K16682+K16682+K16682+K12076+K12076+K03456+K03982+K08731+K08731+K00408+K06269+K06269+K16197+K06685+K16686+K04674+K16684+K02353+K02353+K02353+K02353+K04676+K00408+K00408+K04382+K06685+K06685+K04491+K04500+K16197+K16197+K09448+K16682+K01384+K00444+K04676+K04676+K04501+K04501+K05692+K06269+K08959+K04500+K05692+K02432+K05692+K11828+…
Environmental Information Processing	Signal transduction	Sphingolipid signaling pathway	62	ko04071	g1776.t1;g1776.t2;g1776.t3;g1369.t1;g4929.t1;g394.t1;g427.t1;g4951.t1;g2272.t1;g2279.t1;g2053.t1;g626.t1;g626.t2;g2535.t1;g2738.t1;g2907.t1;g2926.t1;g2926.t2;g2926.t3;g3308.t1;g3661.t1;g3662.t1;g8498.t1;g7723.t1;g8193.t1;g8881.t1;g9090.t1;g9154.t1;g9154.t2;g5690.t1;g5691.t1;g6411.t1;g6652.t1;g6724.t1;g6724.t2;g6865.t1;g6898.t1;g7237.t1;g7284.t1;g7321.t1;g7385.t1;g7478.t1;g7490.t1;g7490.t2;g9643.t…	K11584+K11584+K11584+K04392+K01379+K04514+K01115+K04392+K01634+K03456+K01379+K04513+K04513+K11583+K04426+K01634+K04634+K04634+K04634+K01441+K00922+K00922+K11584+K01379+K04382+K01379+K00654+K06276+K06276+K12351+K12351+K04714+K12350+K04714+K04714+K04371+K01379+K04718+K18050+K11584+K05665+K04712+K05858+K05858+K01379+K04710+K04441+K01379+K01379+K04714+K04714+K02677+K02677+K04456+K00654+K05858+K05858+…
Environmental Information Processing	Signal transduction	Phospholipase D signaling pathway	58	ko04072	g1089.t1;g427.t1;g5354.t1;g2297.t1;g2394.t1;g2435.t1;g4392.t1;g626.t1;g626.t2;g2491.t1;g2567.t1;g2711.t2;g2962.t1;g2962.t2;g3207.t1;g3207.t2;g3506.t1;g3661.t1;g3662.t1;g7690.t1;g9017.t1;g5823.t1;g5839.t1;g6506.t1;g9326.t1;g6628.t1;g6668.t1;g6668.t2;g6668.t3;g6836.t1;g6836.t2;g6865.t1;g6907.t1;g6921.t3;g7237.t1;g7243.t1;g7490.t1;g7490.t2;g9826.t1;g10695.t1;g10788.t1;g10908.t1;g10908.t2;g10976.t1;g…	K04364+K01115+K04289+K08732+K01116+K00901+K07830+K04513+K04513+K04603+K00889+K00889+K00889+K00889+K07937+K07937+K04361+K00922+K00922+K01528+K08045+K07834+K08049+K04605+K13509+K01528+K01528+K01528+K01528+K00901+K00901+K04371+K00901+K01528+K04718+K07293+K05858+K05858+K01080+K07203+K04527+K02677+K02677+K04456+K04605+K04605+K04632+K04632+K18441+K03099+K05858+K05858+K05858+K07827+K07827+K08042+K07831+…
Environmental Information Processing	Signal transduction	AMPK signaling pathway	54	ko04152	g4082.t1;g1889.t1;g1676.t1;g1776.t1;g1776.t2;g1776.t3;g1274.t1;g1504.t1;g1085.t1;g878.t1;g878.t2;g880.t1;g414.t1;g2229.t1;g2279.t1;g5358.t1;g5420.t1;g2292.t1;g2292.t2;g2426.t1;g2427.t2;g5157.t1;g2535.t1;g2939.t1;g2939.t2;g3232.t1;g3572.t1;g3661.t1;g3662.t1;g3683.t1;g3683.t2;g3683.t4;g8498.t1;g8174.t1;g8193.t1;g8202.t1;g8206.t1;g9084.t1;g9154.t1;g9154.t2;g5807.t1;g6239.t1;g6262.t1;g6387.t1;g6493.t…	K07297+K07200+K07297+K11584+K11584+K11584+K07188+K07359+K08272+K07881+K07881+K07881+K19029+K07199+K03456+K07198+K08765+K00021+K00021+K09408+K09408+K00850+K11583+K04135+K04135+K03234+K00693+K00922+K00922+K04688+K04688+K04688+K11584+K00507+K04382+K16172+K07204+K06627+K06276+K06276+K07877+K07298+K04427+K11411+K05870+K00665+K11584+K07197+K07203+K04527+K07188+K04456+K01596+K04456
Environmental Information Processing	Signal transduction	FoxO signaling pathway	48	ko04068	g1889.t1;g3822.t1;g1089.t1;g2229.t1;g4215.t1;g258.t1;g258.t2;g5261.t1;g5261.t2;g5358.t1;g2426.t1;g2427.t2;g1649.t1;g2491.t1;g3112.t1;g3173.t1;g3213.t1;g3506.t1;g3542.t1;g3661.t1;g3662.t1;g8202.t1;g9084.t2;g9154.t1;g9154.t2;g5854.t1;g6239.t1;g6387.t1;g9421.t1;g9421.t2;g9438.t1;g9503.t1;g6865.t1;g9746.t2;g9788.t1;g10635.t1;g10788.t1;g10976.t1;g10988.t1;g10988.t2;g10136.t1;g10248.t1;g10399.t1;g10399…	K07200+K04468+K04364+K07199+K04498+K06631+K06631+K11838+K11838+K07198+K09408+K09408+K09385+K04603+K04365+K04674+K08341+K04361+K13302+K00922+K00922+K16172+K21771+K06276+K06276+K04468+K07298+K11411+K04501+K04501+K21771+K08863+K04371+K15464+K04441+K10305+K04527+K04456+K04501+K04501+K06631+K03099+K07827+K07827+K11434+K01596+K03781+K04456
Environmental Information Processing	Signal transduction	TGF-beta signaling pathway	43	ko04350	g4092.t1;g1598.t1;g1598.t2;g1598.t3;g1733.t1;g226.t1;g226.t2;g1084.t1;g1084.t2;g1455.t1;g394.t1;g2279.t1;g4215.t1;g5144.t1;g626.t1;g626.t2;g3173.t1;g3683.t1;g3683.t2;g3683.t4;g7808.t1;g8193.t1;g9172.t1;g6227.t1;g6258.t1;g6258.t2;g6258.t3;g6258.t4;g5622.t1;g5622.t2;g9421.t1;g9421.t2;g6865.t1;g7014.t1;g7302.t1;g9758.t1;g9758.t2;g10988.t1;g10988.t2;g11052.t1;g9935.t1;g10509.t1;g6039.t1	K13578+K03094+K03094+K03094+K04682+K04683+K04683+K06067+K06067+K03094+K04514+K03456+K04498+K03868+K04513+K04513+K04674+K04688+K04688+K04688+K04676+K04382+K04500+K03094+K18499+K18499+K18499+K18499+K04676+K04676+K04501+K04501+K04371+K03868+K04500+K11644+K11644+K04501+K04501+K03347+K06067+K04662+K04686
Environmental Information Processing	Signal transduction	HIF-1 signaling pathway	42	ko04066	g3993.t1;g3993.t2;g933.t1;g4215.t1;g4711.t1;g4671.t1;g2043.t1;g5577.t1;g2394.t1;g4523.t1;g5144.t1;g5157.t1;g2546.t1;g2735.t1;g2735.t2;g3043.t1;g3506.t1;g3661.t1;g3662.t1;g3683.t1;g3683.t2;g3683.t4;g8269.t1;g8269.t2;g6440.t1;g5584.t1;g5648.t1;g5648.t2;g8840.t1;g6765.t1;g6865.t1;g7014.t1;g7078.t1;g7228.t1;g9675.t1;g9675.t2;g10695.t1;g10788.t1;g10908.t1;g10908.t2;g10976.t1;g6176.t1	K01689+K01689+K03259+K04498+K07299+K07299+K03982+K00134+K01116+K03870+K03868+K00850+K00016+K03259+K03259+K00162+K04361+K00922+K00922+K04688+K04688+K04688+K07299+K07299+K00844+K03872+K04372+K04372+K02991+K00927+K04371+K03868+K00844+K00161+K09097+K09097+K07203+K04527+K02677+K02677+K04456+K04456
Environmental Information Processing	Signal transduction	MAPK signaling pathway - fly	37	ko04013	g4059.t1;g4092.t1;g1709.t1;g1369.t1;g1089.t1;g918.t1;g4951.t1;g269.t1;g269.t2;g2341.t1;g2543.t1;g2602.t1;g2738.t1;g2897.t1;g3112.t1;g3506.t1;g3534.t1;g8193.t1;g5695.t1;g8611.t1;g6262.t1;g9329.t1;g6865.t1;g7064.t1;g7178.t1;g7243.t1;g7433.t1;g9788.t1;g10983.t1;g10983.t2;g10157.t1;g10248.t1;g10399.t1;g10399.t2;g10467.t1;g10486.t1;g10509.t1	K16197+K13578+K05088+K04392+K04364+K04497+K04392+K10176+K10176+K05759+K16197+K04506+K04426+K06689+K04365+K04361+K13411+K04382+K16197+K16197+K04427+K08545+K04371+K14290+K05088+K07293+K04430+K04441+K04432+K04432+K05704+K03099+K07827+K07827+K04392+K17608+K04662
Environmental Information Processing	Signal transduction	Hippo signaling pathway - fly	36	ko04391	g4059.t1;g1609.t1;g1020.t1;g1111.t1;g1111.t2;g921.t1;g921.t2;g4221.t1;g4225.t1;g4225.t2;g4225.t3;g2098.t1;g2098.t2;g2279.t1;g2364.t1;g2364.t2;g2543.t1;g2692.t1;g2793.t1;g3327.t1;g3568.t1;g7808.t1;g8193.t1;g8194.t1;g8194.t2;g5695.t1;g8611.t1;g9230.t1;g6240.t1;g5622.t1;g5622.t2;g9497.t1;g6959.t1;g7469.t1;g9781.t1;g10630.t1	K16197+K05692+K06093+K06626+K06626+K04412+K04412+K16682+K16682+K16682+K16682+K12076+K12076+K03456+K06095+K06095+K16197+K06685+K16686+K16507+K16684+K04676+K04382+K06685+K06685+K16197+K16197+K09448+K16682+K04676+K04676+K05628+K05692+K05692+K05692+K08791
Environmental Information Processing	Signaling molecules and interaction	Neuroactive ligand-receptor interaction	30	ko04080	g1701.t1;g5354.t1;g2491.t1;g2939.t1;g2939.t2;g3016.t1;g3079.t1;g3204.t1;g3527.t1;g5763.t1;g6187.t1;g6506.t1;g6926.t1;g6926.t2;g10660.t1;g10847.t1;g10909.t1;g10909.t2;g10985.t1;g10985.t2;g10029.t1;g10030.t1;g10030.t2;g10072.t1;g10203.t1;g10203.t2;g10365.t1;g10365.t2;g10502.t1;g6114.t1	K05209+K04289+K04603+K04135+K04135+K04139+K04153+K04615+K04282+K04153+K05202+K04605+K04218+K04218+K04163+K04578+K04148+K04144+K04605+K04605+K05208+K05208+K05208+K04239+K04145+K04145+K08362+K08362+K05181+K04205
Environmental Information Processing	Signal transduction	Hedgehog signaling pathway - fly	28	ko04341	g4457.t1;g1598.t1;g1598.t2;g1598.t3;g807.t1;g1455.t1;g264.t1;g5482.t1;g5513.t1;g5090.t1;g5144.t1;g5174.t1;g3521.t1;g3630.t1;g3630.t2;g3630.t3;g8123.t1;g8408.t1;g8606.t1;g8606.t2;g6227.t1;g7014.t1;g10776.t1;g10936.t1;g10936.t2;g11052.t1;g9920.t1;g10509.t1	K04345+K03094+K03094+K03094+K10523+K03094+K10523+K06225+K06225+K09319+K03868+K09319+K08957+K04345+K04345+K04345+K08958+K03869+K10523+K10523+K03094+K03868+K10523+K08291+K08291+K03347+K03869+K04662
Environmental Information Processing	Signal transduction	MAPK signaling pathway - yeast	27	ko04011	g4114.t1;g1460.t1;g1463.t1;g4228.t1;g4228.t2;g1147.t1;g626.t1;g626.t2;g2567.t1;g2711.t2;g2962.t1;g2962.t2;g9154.t1;g9154.t2;g5800.t3;g9230.t1;g6551.t1;g9478.t1;g9478.t2;g6827.t1;g6865.t1;g7198.t1;g9788.t1;g10908.t1;g10908.t2;g6033.t1;g6129.t1	K00888+K04536+K04536+K00006+K00006+K04409+K04513+K04513+K00889+K00889+K00889+K00889+K06276+K06276+K08294+K09448+K04409+K04393+K04393+K00888+K04371+K04409+K04441+K02677+K02677+K00006+K03781
Environmental Information Processing	Signal transduction	Hedgehog signaling pathway	27	ko04340	g4457.t1;g807.t1;g264.t1;g5482.t1;g5513.t1;g2566.t1;g3521.t1;g3630.t1;g3630.t2;g3630.t3;g8123.t1;g8408.t1;g8606.t1;g8606.t2;g6185.t1;g6185.t2;g7768.t1;g7768.t2;g7768.t3;g7768.t4;g6912.t1;g7286.t1;g10776.t1;g11052.t1;g9920.t1;g10250.t1;g10413.t1	K04345+K10523+K10523+K06225+K06225+K10394+K08957+K04345+K04345+K04345+K08958+K03869+K10523+K10523+K10604+K10604+K10604+K10604+K10604+K10604+K04439+K08959+K10523+K03347+K03869+K08959+K06233
Environmental Information Processing	Signal transduction	VEGF signaling pathway	27	ko04370	g1369.t1;g4951.t1;g2394.t1;g3661.t1;g3662.t1;g6283.t1;g6283.t2;g6283.t3;g6549.t1;g6549.t2;g9478.t1;g9478.t2;g6865.t1;g7212.t1;g7212.t2;g7237.t1;g9748.t1;g9748.t2;g9788.t1;g10908.t1;g10908.t2;g10976.t1;g10157.t1;g10399.t1;g10399.t2;g10467.t1;g6176.t1	K04392+K04392+K01116+K00922+K00922+K04443+K04443+K04443+K04348+K04348+K04393+K04393+K04371+K06268+K06268+K04718+K06268+K06268+K04441+K02677+K02677+K04456+K05704+K07827+K07827+K04392+K04456
Environmental Information Processing	Signal transduction	ErbB signaling pathway	26	ko04012	g1089.t1;g2342.t1;g2394.t1;g5151.t1;g1147.t1;g3112.t1;g3506.t1;g3661.t1;g3662.t1;g3683.t1;g3683.t2;g3683.t4;g9135.t1;g6551.t1;g6865.t1;g7198.t1;g7433.t1;g10695.t1;g10908.t1;g10908.t2;g10976.t1;g10157.t1;g10248.t1;g10399.t1;g10399.t2;g6176.t1	K04364+K19862+K01116+K06619+K04409+K04365+K04361+K00922+K00922+K04688+K04688+K04688+K04707+K04409+K04371+K04409+K04430+K07203+K02677+K02677+K04456+K05704+K03099+K07827+K07827+K04456
Environmental Information Processing	Signal transduction	MAPK signaling pathway - plant	24	ko04016	g4022.t1;g4022.t2;g940.t1;g940.t2;g2556.t1;g2759.t1;g2759.t2;g3261.t2;g3373.t1;g3402.t1;g3412.t1;g3422.t1;g3422.t2;g3426.t1;g3426.t2;g3452.t1;g7614.t1;g9070.t1;g7107.t1;g7340.t1;g9621.t1;g9632.t1;g10530.t1;g6129.t1	K02183+K02183+K02183+K02183+K02183+K02183+K02183+K00940+K02183+K02183+K02183+K02183+K02183+K02183+K02183+K02183+K00940+K00940+K02183+K17686+K02183+K02183+K02183+K03781
Environmental Information Processing	Signal transduction	TNF signaling pathway	23	ko04668	g2194.t1;g2738.t1;g2904.t1;g2904.t2;g2904.t3;g3661.t1;g3662.t1;g8499.t1;g6262.t1;g6320.t1;g6320.t2;g6320.t3;g6493.t3;g6865.t1;g7162.t1;g7433.t1;g9788.t1;g10976.t1;g10983.t1;g10983.t2;g10226.t1;g10227.t1;g6176.t1	K07763+K04426+K17065+K17065+K17065+K00922+K00922+K17065+K04427+K04445+K04445+K04445+K05870+K04371+K04734+K04430+K04441+K04456+K04432+K04432+K07763+K07763+K04456
Environmental Information Processing	Signal transduction	Plant hormone signal transduction	20	ko04075	g1888.t1;g4022.t1;g4022.t2;g940.t1;g940.t2;g2556.t1;g2759.t1;g2759.t2;g3373.t1;g3402.t1;g3412.t1;g3422.t1;g3422.t2;g3426.t1;g3426.t2;g3452.t1;g7107.t1;g9621.t1;g9632.t1;g10530.t1	K01915+K02183+K02183+K02183+K02183+K02183+K02183+K02183+K02183+K02183+K02183+K02183+K02183+K02183+K02183+K02183+K02183+K02183+K02183+K02183
Environmental Information Processing	Signal transduction	Hippo signaling pathway - multiple species	20	ko04392	g921.t1;g921.t2;g4221.t1;g4225.t1;g4225.t2;g4225.t3;g1147.t1;g2692.t1;g2793.t1;g3327.t1;g3568.t1;g8194.t1;g8194.t2;g9230.t1;g6240.t1;g6551.t1;g7198.t1;g10630.t1;g10268.t1;g10268.t2	K04412+K04412+K16682+K16682+K16682+K16682+K04409+K06685+K16686+K16507+K16684+K06685+K06685+K09448+K16682+K04409+K04409+K08791+K20236+K20236
Environmental Information Processing	Signal transduction	Notch signaling pathway	19	ko04330	g1084.t1;g1084.t2;g875.t1;g918.t1;g4215.t1;g2294.t1;g3660.t1;g3739.t1;g3739.t2;g3739.t3;g3746.t1;g5596.t1;g5596.t2;g5596.t3;g9416.t1;g9417.t1;g7199.t1;g7458.t1;g9935.t1	K06067+K06067+K04496+K04497+K04498+K06058+K06053+K02353+K02353+K02353+K02353+K06066+K06066+K06066+K06062+K06062+K06051+K06063+K06067
Environmental Information Processing	Membrane transport	ABC transporters	17	ko02010	g5009.t1;g1094.t1;g1094.t2;g915.t1;g915.t2;g915.t3;g2387.t1;g3206.t1;g3206.t2;g3206.t4;g3500.t1;g8781.t1;g8781.t2;g5645.t1;g7234.t1;g7356.t1;g7385.t1	K05674+K05658+K05658+K05656+K05656+K05656+K05677+K05655+K05655+K05655+K05643+K05661+K05661+K05658+K05678+K05658+K05665
Environmental Information Processing	Signal transduction	JAK-STAT signaling pathway	14	ko04630	g1089.t1;g4215.t1;g4540.t1;g5152.t1;g5152.t2;g3506.t1;g3661.t1;g3662.t1;g7243.t1;g10695.t1;g10976.t1;g10047.t1;g10248.t1;g6176.t1	K04364+K04498+K04702+K04705+K04705+K04361+K00922+K00922+K07293+K07203+K04456+K04706+K03099+K04456
Environmental Information Processing	Signal transduction	Two-component system	12	ko02020	g514.t1;g1888.t1;g3909.t1;g1472.t1;g4947.t1;g4947.t2;g5268.t1;g5268.t2;g5270.t1;g2839.t1;g8365.t1;g7331.t1	K01179+K01915+K01179+K01425+K00626+K00626+K00626+K00626+K00626+K08738+K00411+K02259
Environmental Information Processing	Signaling molecules and interaction	ECM-receptor interaction	9	ko04512	g5022.t1;g1029.t1;g1043.t1;g1451.t1;g5341.t1;g5833.t1;g7377.t1;g7409.t1;g6126.t1	K05636+K05635+K05635+K06255+K05719+K06584+K05637+K05637+K06240
Environmental Information Processing	Signal transduction	NF-kappa B signaling pathway	8	ko04064	g1116.t1;g2394.t1;g8183.t1;g8183.t2;g6262.t1;g9405.t1;g7162.t1;g5921.t1	K03115+K01116+K05399+K05399+K04427+K07369+K04734+K03097
Environmental Information Processing	Signaling molecules and interaction	Cell adhesion molecules	8	ko04514	g2244.t1;g5341.t1;g2313.t1;g8200.t1;g5833.t1;g6495.t1;g6723.t1;g10916.t1	K07380+K05719+K07378+K06756+K06584+K05695+K07378+K07378
Environmental Information Processing	Membrane transport	Bacterial secretion system	5	ko03070	g2715.t1;g9559.t1;g9560.t1;g6216.t1;g6216.t2	K03106+K03070+K03070+K03217+K03217
Environmental Information Processing	Signaling molecules and interaction	Cytokine-cytokine receptor interaction	5	ko04060	g4092.t1;g3173.t1;g10650.t1;g10650.t2;g10509.t1	K13578+K04674+K05168+K05168+K04662
Genetic Information Processing	Transcription	Spliceosome	138	ko03040	g2002.t1;g2002.t2;g1894.t1;g1901.t1;g1901.t2;g1901.t3;g1901.t4;g1901.t5;g5203.t1;g5203.t2;g1737.t1;g1737.t2;g1524.t1;g96.t1;g96.t2;g96.t3;g4632.t1;g1477.t1;g1477.t2;g1477.t3;g410.t1;g2148.t1;g2148.t2;g2148.t3;g2226.t1;g3952.t1;g3960.t1;g5391.t1;g5402.t1;g5404.t1;g5563.t1;g5563.t2;g2301.t1;g2301.t2;g2437.t1;g2437.t2;g2437.t3;g614.t1;g1642.t1;g4363.t1;g176.t1;g177.t1;g2781.t1;g2811.t1;g2938.t1;g294…	K11092+K11092+K12741+K12893+K12893+K12893+K12893+K12893+K12850+K12850+K12819+K12819+K03283+K12893+K12893+K12893+K12849+K12843+K12843+K12843+K11087+K12836+K12836+K12836+K12873+K12890+K12890+K12862+K12847+K12839+K13098+K13098+K12848+K12848+K12893+K12893+K12893+K12888+K03283+K12881+K12832+K12891+K12879+K12844+K12830+K12830+K11086+K11086+K12622+K12890+K12890+K12840+K12817+K12817+K12817+K12826+K12811+…
Genetic Information Processing	Translation	Ribosome	136	ko03010	g3802.t1;g1727.t1;g1731.t1;g1750.t1;g1777.t1;g1777.t2;g1207.t1;g238.t1;g238.t3;g241.t1;g4003.t4;g4032.t1;g368.t1;g368.t2;g4648.t1;g2108.t1;g255.t1;g3932.t1;g3932.t2;g5360.t1;g5394.t1;g2423.t2;g612.t1;g5156.t1;g5162.t1;g2542.t1;g2542.t2;g2589.t1;g2627.t1;g2840.t1;g2840.t2;g2925.t1;g2988.t1;g3121.t1;g3121.t2;g3166.t1;g3166.t2;g3190.t2;g3190.t3;g3420.t1;g3494.t1;g3495.t1;g3514.t1;g3525.t1;g3600.t1;g…	K02906+K02873+K02867+K02960+K02967+K02967+K02922+K02985+K02985+K02993+K02872+K02992+K02951+K02951+K02987+K02978+K02987+K02865+K02865+K02920+K02912+K02959+K02927+K02927+K02892+K02963+K02963+K02870+K02893+K02882+K02882+K02901+K02969+K02905+K02905+K02886+K02886+K02974+K02974+K02941+K02942+K02900+K02937+K02889+K02866+K02866+K02984+K02984+K02934+K02876+K02894+K02978+K02976+K02864+K02885+K02890+K02910+…
Genetic Information Processing	Folding, sorting and degradation	Protein processing in endoplasmic reticulum	114	ko04141	g4086.t1;g4086.t2;g4086.t3;g1598.t1;g1598.t2;g1598.t3;g1666.t1;g1672.t1;g1688.t1;g1706.t1;g1213.t1;g1524.t1;g3994.t1;g359.t1;g359.t2;g1108.t1;g39.t1;g4630.t1;g784.t1;g1455.t1;g1473.t1;g930.t1;g5037.t1;g434.t1;g697.t1;g3956.t1;g828.t1;g5509.t1;g5510.t1;g5525.t1;g2302.t1;g2325.t1;g1642.t1;g5104.t1;g5104.t2;g5105.t1;g5105.t2;g5118.t1;g5118.t2;g5140.t1;g5144.t1;g5147.t1;g5161.t1;g1804.t1;g3834.t1;g11…	K01228+K01228+K01228+K03094+K03094+K03094+K01230+K08057+K14026+K05546+K09481+K03283+K09525+K04079+K04079+K13249+K09490+K09486+K09561+K03094+K09507+K09490+K01228+K12670+K04554+K04079+K09490+K08288+K09517+K08852+K12669+K09027+K03283+K12667+K12667+K12667+K12667+K12668+K12668+K13525+K03868+K13525+K14010+K13989+K04554+K09508+K10956+K10956+K04426+K09518+K09518+K06689+K14016+K14016+K04523+K09517+K09517+…
Genetic Information Processing	Folding, sorting and degradation	Ubiquitin mediated proteolysis	89	ko04120	g1598.t1;g1598.t2;g1598.t3;g1238.t1;g4704.t1;g4707.t1;g1503.t1;g784.t1;g1455.t1;g416.t1;g2070.t1;g697.t1;g5312.t1;g5312.t2;g5569.t1;g2314.t1;g2447.t1;g4523.t1;g612.t1;g5100.t1;g5144.t1;g5156.t1;g3834.t1;g2462.t1;g2601.t3;g2602.t1;g2699.t1;g2897.t1;g3100.t1;g3145.t1;g3161.t1;g3181.t1;g3181.t2;g3524.t1;g3625.t1;g8777.t1;g8777.t2;g8408.t1;g8351.t1;g9135.t1;g5774.t1;g5835.t1;g8597.t1;g8624.t1;g9235.t…	K03094+K03094+K03094+K04552+K04551+K04551+K10586+K09561+K03094+K05633+K04551+K04554+K10598+K10598+K10588+K10586+K03364+K03870+K02927+K08770+K03868+K02927+K04554+K10610+K03357+K04506+K10688+K06689+K10580+K10687+K10576+K03358+K03358+K03351+K10578+K10686+K10686+K03869+K04552+K04707+K04555+K10685+K04552+K04552+K04551+K04551+K10604+K10604+K03350+K03094+K10685+K10599+K03872+K02927+K02927+K04554+K04554+…
Genetic Information Processing	Translation	mRNA surveillance pathway	63	ko03015	g135.t1;g1744.t1;g1776.t1;g1776.t2;g1776.t3;g229.t1;g379.t1;g1008.t1;g2279.t1;g5563.t1;g5563.t2;g4363.t1;g5077.t1;g5078.t1;g2535.t1;g2995.t1;g3035.t1;g3048.t1;g3096.t1;g3252.t1;g3334.t1;g3334.t2;g3342.t1;g3647.t1;g7815.t1;g7815.t2;g8782.t1;g8124.t1;g8498.t1;g8193.t1;g9107.t1;g5772.t1;g6341.t1;g6341.t2;g8678.t1;g5587.t1;g5627.t1;g5640.t1;g9374.t1;g9516.t1;g7782.t1;g7782.t2;g6605.t1;g6615.t1;g6615.…	K13126+K14376+K11584+K11584+K11584+K06100+K14294+K06269+K03456+K13098+K13098+K12881+K06269+K06269+K11583+K14397+K00565+K14403+K14404+K14325+K12812+K12812+K14324+K18655+K14411+K14411+K13917+K14416+K11584+K04382+K14407+K14285+K14396+K14396+K14411+K12883+K14406+K15542+K13114+K15544+K13126+K13126+K14399+K14402+K14402+K14328+K03267+K03267+K06269+K03265+K11584+K14408+K14396+K14326+K12876+K12876+K12877+…
Genetic Information Processing	Translation	Aminoacyl-tRNA biosynthesis	61	ko00970	g1127.t1;g591.t1;g596.t1;g596.t2;g596.t3;g909.t1;g4219.t1;g4219.t2;g280.t1;g5508.t1;g2608.t1;g2608.t2;g2608.t3;g2608.t4;g2850.t1;g2850.t2;g2850.t3;g2851.t1;g2851.t2;g2862.t1;g2862.t2;g2989.t1;g3194.t1;g3523.t1;g3523.t2;g3684.t1;g3730.t1;g8783.t1;g8784.t1;g8785.t1;g8800.t1;g8091.t1;g8537.t1;g8537.t2;g9039.t1;g8259.t1;g8259.t2;g8260.t1;g9568.t1;g9570.t1;g9423.t1;g9457.t1;g9457.t2;g9457.t3;g9470.t1;…	K01870+K01886+K01874+K01874+K01874+K01893+K01867+K01867+K01872+K01887+K01889+K01889+K01889+K01889+K01870+K01870+K01870+K01883+K01883+K01866+K01866+K01869+K02433+K01881+K01881+K01893+K01887+K04567+K04567+K04567+K04567+K01893+K01875+K01875+K01880+K04567+K04567+K04567+K01875+K04567+K22503+K01872+K01872+K01872+K01866+K01866+K01866+K01889+K01873+K01873+K01868+K01885+K01885+K01890+K01881+K01869+K01867+…
Genetic Information Processing	Chromosome	ATP-dependent chromatin remodeling	54	ko03082	g116.t1;g1602.t1;g1609.t1;g1611.t1;g1665.t1;g363.t1;g1084.t1;g1084.t2;g395.t1;g5374.t1;g5444.t2;g5539.t1;g4525.t1;g2467.t1;g2484.t1;g2965.t1;g3073.t1;g3073.t2;g3123.t1;g3714.t1;g3714.t2;g8652.t1;g5752.t1;g9231.t1;g9255.t2;g6302.t1;g6302.t3;g6340.t1;g6340.t2;g6544.t1;g9514.t1;g6596.t1;g6959.t1;g7035.t1;g7035.t2;g7036.t1;g7036.t2;g7036.t3;g7079.t1;g7079.t2;g7292.t1;g7469.t1;g9781.t1;g9859.t1;g10625…	K11757+K11251+K05692+K11251+K11660+K11251+K06067+K06067+K11665+K11728+K11319+K11650+K11757+K11251+K11251+K11590+K11648+K11648+K11647+K11662+K11662+K11251+K11757+K04499+K11757+K11343+K11343+K11664+K11664+K11341+K11643+K11338+K05692+K11660+K11660+K11660+K11660+K11660+K02326+K02326+K22197+K05692+K05692+K11251+K11674+K11674+K10752+K06067+K11324+K11340+K11649+K11651+K11654+K11319
Genetic Information Processing	Folding, sorting and degradation	RNA degradation	53	ko03018	g135.t1;g1391.t1;g1391.t2;g5194.t1;g3993.t1;g3993.t2;g1062.t1;g1062.t2;g403.t1;g404.t1;g411.t1;g4222.t1;g2134.t1;g2273.t1;g5535.t1;g1650.t1;g1650.t2;g5157.t1;g5163.t1;g4567.t1;g2520.t1;g2808.t1;g2865.t1;g3055.t1;g3055.t2;g3094.t1;g3103.t1;g3122.t1;g3214.t1;g3300.t1;g3300.t2;g3470.t1;g3471.t1;g3471.t2;g3607.t1;g3721.t1;g8540.t1;g8541.t1;g5788.t1;g5788.t2;g9550.t1;g9576.t1;g9484.t1;g7782.t1;g7782.t…	K13126+K12617+K12617+K04077+K01689+K01689+K12604+K12604+K03681+K12589+K12619+K12604+K12581+K12620+K12591+K12605+K12605+K00850+K00962+K12603+K12584+K12613+K12585+K10643+K10643+K12622+K12585+K12610+K12626+K03679+K03679+K04077+K04077+K04077+K12599+K12605+K04077+K04077+K12599+K12599+K04043+K00970+K12598+K13126+K13126+K07573+K07573+K04043+K12606+K12606+K03678+K12580+K12592
Genetic Information Processing	Translation	Nucleocytoplasmic transport	52	ko03013	g379.t1;g50.t1;g793.t1;g4233.t1;g4363.t1;g2528.t1;g2528.t2;g2781.t1;g2814.t2;g2814.t3;g2915.t1;g2915.t2;g2952.t1;g2952.t2;g2953.t1;g2994.t1;g3252.t1;g3289.t1;g3334.t1;g3334.t2;g3342.t1;g3475.t1;g3475.t2;g3647.t1;g8548.t1;g8553.t1;g8162.t2;g5689.t1;g5772.t1;g8572.t1;g6319.t1;g5587.t1;g5616.t1;g9374.t1;g6756.t1;g6843.t1;g6843.t2;g7064.t1;g7074.t1;g7113.t1;g7113.t2;g9610.t1;g10649.t1;g10730.t1;g1073…	K14294+K14319+K14297+K18752+K12881+K14317+K14317+K12879+K13151+K13151+K14313+K14313+K14298+K14298+K14298+K15043+K14325+K18423+K12812+K12812+K14324+K12880+K12880+K18655+K12160+K12160+K14291+K14293+K14285+K14306+K07562+K12883+K12878+K13114+K14328+K14004+K14004+K14290+K13174+K18460+K18460+K12172+K14326+K12876+K12876+K07936+K20724+K14299+K12877+K12877+K03231+K12882
Genetic Information Processing	Translation	Ribosome biogenesis in eukaryotes	50	ko03008	g4005.t1;g1116.t1;g486.t1;g411.t1;g5297.t1;g5297.t2;g5297.t3;g5561.t1;g4335.t1;g4335.t2;g4405.t1;g5119.t1;g2798.t1;g2946.t1;g2946.t2;g3030.t1;g3059.t1;g3071.t1;g3222.t1;g3250.t1;g3619.t1;g3671.t1;g3720.t1;g8108.t1;g8109.t1;g9088.t1;g9088.t2;g9089.t1;g9089.t2;g5711.t1;g5749.t1;g5768.t1;g5772.t1;g5847.t1;g6314.t1;g6319.t1;g5670.t1;g9456.t1;g9475.t1;g6560.t1;g6560.t3;g7064.t1;g10611.t1;g10611.t2;g10…	K06943+K03115+K14566+K12619+K14556+K14556+K14556+K14563+K14539+K14539+K03685+K14525+K14570+K14566+K14566+K03264+K14527+K14561+K03539+K11108+K14570+K14560+K18532+K14536+K14536+K14538+K14538+K14538+K14538+K14558+K14574+K14537+K14285+K14568+K14572+K07562+K14521+K14569+K14573+K03538+K03538+K14290+K14564+K14564+K11131+K07936+K07179+K03097+K14565+K13288
Genetic Information Processing	Replication and repair	Nucleotide excision repair	47	ko03420	g1390.t1;g4041.t1;g4041.t2;g4041.t3;g4042.t1;g1083.t1;g950.t1;g430.t1;g4845.t1;g2317.t1;g5144.t1;g1947.t1;g2452.t1;g2452.t2;g2462.t1;g2679.t1;g2681.t1;g2681.t2;g2948.t1;g2948.t2;g2948.t3;g3060.t1;g3060.t2;g3182.t1;g3657.t1;g3699.t1;g3699.t2;g3729.t1;g8096.t1;g6336.t1;g6336.t2;g6407.t1;g6428.t1;g6494.t2;g5662.t1;g5676.t1;g6675.t1;g6725.t1;g6838.t1;g7014.t1;g7079.t1;g7079.t2;g7189.t1;g9611.t1;g9611…	K10848+K10755+K10755+K10755+K10755+K02202+K10845+K02328+K10747+K02324+K03868+K07466+K10841+K10841+K10610+K03144+K03144+K03144+K10849+K10849+K10849+K10846+K10846+K10838+K03017+K03011+K03011+K03016+K03014+K10755+K10755+K03010+K04802+K10839+K02327+K10840+K10609+K03007+K10844+K03868+K02326+K02326+K03006+K10754+K10754+K10843+K03142
Genetic Information Processing	Folding, sorting and degradation	Proteasome	44	ko03050	g1210.t2;g1120.t1;g102.t1;g857.t1;g931.t1;g2166.t1;g282.t1;g282.t2;g2029.t1;g5331.t1;g5331.t2;g5434.t1;g5487.t1;g5487.t2;g4361.t1;g179.t1;g179.t2;g2482.t1;g2616.t1;g2977.t1;g3224.t1;g3224.t2;g3715.t1;g8729.t1;g8729.t2;g8736.t1;g8738.t1;g8739.t1;g8740.t1;g8744.t1;g5709.t1;g8837.t1;g8854.t1;g6573.t1;g6574.t1;g7241.t1;g7410.t1;g10676.t2;g10755.t1;g10755.t2;g10755.t3;g9982.t1;g10008.t1;g6052.t1	K06691+K03066+K03032+K02733+K02725+K03033+K02728+K02728+K03063+K03064+K03064+K02735+K03031+K03031+K02736+K02733+K02733+K02737+K02732+K03065+K03037+K03037+K03035+K03036+K03036+K03036+K03036+K03036+K03036+K03036+K03062+K02738+K02727+K02734+K02731+K06699+K03029+K10881+K02726+K02726+K02726+K02730+K03039+K06691
Genetic Information Processing	Replication and repair	DNA replication	34	ko03030	g1689.t1;g4041.t1;g4041.t2;g4041.t3;g4042.t1;g1073.t1;g1114.t1;g430.t1;g2191.t1;g4845.t1;g5237.t1;g2317.t1;g1947.t1;g2591.t1;g2943.t1;g2943.t2;g3026.t1;g6336.t1;g6336.t2;g6428.t1;g5662.t1;g5680.t1;g6584.t1;g6584.t2;g6584.t3;g7079.t1;g7079.t2;g9611.t1;g9611.t2;g10989.t1;g10990.t1;g10265.t1;g10324.t1;g6173.t1	K02684+K10755+K10755+K10755+K10755+K02540+K02209+K02328+K02684+K10747+K04799+K02324+K07466+K02320+K02685+K02685+K02212+K10755+K10755+K04802+K02327+K04799+K02541+K02541+K02541+K02326+K02326+K10754+K10754+K03469+K03469+K03111+K02542+K02210
Genetic Information Processing	Information processing in viruses	Viral life cycle - HIV-1	34	ko03250	g4097.t1;g4215.t1;g156.t1;g5435.t1;g5435.t2;g5159.t1;g5159.t2;g2629.t2;g2826.t1;g2826.t2;g2860.t1;g2860.t2;g2860.t3;g3061.t1;g3073.t1;g3073.t2;g3077.t1;g8103.t1;g8103.t2;g8103.t3;g5626.t1;g9416.t1;g9417.t1;g6841.t1;g6984.t1;g7064.t1;g7471.t1;g7471.t2;g9610.t1;g10733.t1;g10111.t1;g10111.t2;g10501.t1;g5980.t1	K18739+K04498+K12196+K12194+K12194+K12196+K12196+K15181+K12182+K12182+K15172+K15172+K15172+K15171+K11648+K11648+K15188+K01349+K01349+K01349+K12183+K06062+K06062+K12200+K09578+K14290+K12194+K12194+K12172+K07936+K15187+K15187+K02211+K01349
Genetic Information Processing	Replication and repair	Base excision repair	33	ko03410	g4960.t1;g1667.t1;g1667.t2;g1667.t3;g4041.t1;g4041.t2;g4041.t3;g4042.t1;g1018.t1;g4641.t1;g4641.t2;g430.t1;g4845.t1;g5237.t1;g5395.t1;g5480.t1;g2317.t1;g2717.t1;g2717.t2;g3127.t1;g3127.t2;g6336.t1;g6336.t2;g6428.t1;g5662.t1;g5668.t1;g5680.t1;g7079.t1;g7079.t2;g9611.t1;g9611.t2;g10432.t1;g10487.t1	K10802+K02333+K02333+K02333+K10755+K10755+K10755+K10755+K10798+K10798+K10798+K02328+K10747+K04799+K10771+K10773+K02324+K08073+K08073+K07759+K07759+K10755+K10755+K04802+K02327+K02332+K04799+K02326+K02326+K10754+K10754+K03660+K10771
Genetic Information Processing	Chromosome	Polycomb repressive complex	31	ko03083	g1598.t1;g1598.t2;g1598.t3;g226.t1;g226.t2;g1084.t1;g1084.t2;g1116.t1;g859.t1;g859.t2;g859.t3;g1455.t1;g4215.t1;g139.t1;g5261.t1;g5261.t2;g2897.t1;g3097.t1;g3097.t2;g9056.t1;g6227.t1;g6507.t1;g6646.t1;g7465.t1;g9600.t1;g9821.t1;g10998.t1;g9935.t1;g10252.t1;g10252.t2;g10440.t1	K03094+K03094+K03094+K04683+K04683+K06067+K06067+K03115+K10276+K10276+K10276+K03094+K04498+K10695+K11838+K11838+K06689+K11488+K11488+K04453+K03094+K11805+K11468+K11844+K11430+K14963+K10752+K06067+K11430+K11430+K09667
Genetic Information Processing	Transcription	Basal transcription factors	29	ko03022	g1083.t1;g950.t1;g746.t1;g2679.t1;g2681.t1;g2681.t2;g2741.t1;g9077.t1;g8755.t1;g6260.t1;g6260.t2;g6493.t1;g6493.t2;g7878.t1;g8683.t1;g9315.t1;g8836.t1;g8836.t2;g6662.t1;g6662.t2;g6838.t1;g7211.t1;g7211.t2;g7290.t1;g7345.t1;g10618.t1;g10618.t2;g10743.t1;g10481.t1	K02202+K10845+K03120+K03144+K03144+K03144+K03125+K03123+K03120+K03120+K03120+K03136+K03136+K03120+K03120+K03127+K03135+K03135+K03131+K03131+K10844+K03130+K03130+K03122+K03124+K03137+K03137+K10843+K03142
Genetic Information Processing	Folding, sorting and degradation	Protein export	28	ko03060	g4973.t1;g1662.t1;g1662.t2;g1213.t1;g39.t1;g930.t1;g828.t1;g2704.t1;g2704.t2;g2715.t1;g3724.t1;g3724.t2;g3741.t1;g8993.t1;g8658.t1;g9559.t1;g9560.t1;g6216.t1;g6216.t2;g9462.t1;g9462.t2;g9462.t3;g10046.t1;g10461.t1;g5954.t1;g5954.t2;g6056.t1;g6128.t1	K16365+K12272+K12272+K09481+K09490+K09490+K09490+K10956+K10956+K03106+K01551+K01551+K13431+K13280+K09647+K03070+K03070+K03217+K03217+K03107+K03107+K03107+K09540+K03105+K12948+K12948+K16365+K16365
Genetic Information Processing	Replication and repair	Mismatch repair	18	ko03430	g1674.t1;g4041.t1;g4041.t2;g4041.t3;g4042.t1;g430.t1;g4845.t1;g1947.t1;g2807.t1;g2968.t1;g6336.t1;g6336.t2;g6428.t1;g5662.t1;g9611.t1;g9611.t2;g10265.t1;g10504.t1	K10746+K10755+K10755+K10755+K10755+K02328+K10747+K07466+K08734+K08737+K10755+K10755+K04802+K02327+K10754+K10754+K03111+K10858
Genetic Information Processing	Transcription	RNA polymerase	17	ko03020	g3784.t1;g3784.t2;g1658.t1;g1640.t1;g2577.t1;g3219.t1;g3657.t1;g3699.t1;g3699.t2;g3729.t1;g8096.t1;g9091.t1;g6407.t1;g6725.t1;g7189.t1;g10518.t1;g10518.t2	K03022+K03022+K03027+K03002+K03019+K03023+K03017+K03011+K03011+K03016+K03014+K03020+K03010+K03007+K03006+K03027+K03027
Genetic Information Processing	Replication and repair	Fanconi anemia pathway	17	ko03460	g1390.t1;g272.t1;g272.t2;g5094.t1;g1947.t1;g2734.t1;g2734.t2;g2807.t1;g2948.t1;g2948.t2;g2948.t3;g5829.t1;g6581.t1;g6902.t1;g7052.t1;g10113.t1;g10504.t1	K10848+K03509+K03509+K03511+K07466+K10901+K10901+K08734+K10849+K10849+K10849+K15362+K15361+K03165+K04482+K03165+K10858
Genetic Information Processing	Folding, sorting and degradation	SNARE interactions in vesicular transport	17	ko04130	g4031.t1;g4031.t2;g4031.t3;g2319.t1;g2506.t1;g3009.t1;g3054.t1;g3054.t2;g8295.t1;g7168.t2;g7506.t1;g7506.t2;g10667.t1;g10667.t2;g10667.t3;g10705.t1;g10264.t2	K08493+K08493+K08493+K08517+K04560+K08491+K08504+K08504+K08492+K08496+K08492+K08492+K04560+K04560+K04560+K08489+K08509
Genetic Information Processing	Replication and repair	Homologous recombination	15	ko03440	g1723.t1;g1723.t2;g1139.t1;g430.t1;g1947.t1;g2734.t1;g2734.t2;g5727.t1;g5829.t1;g5662.t1;g6902.t1;g7052.t1;g10676.t2;g10113.t1;g10265.t1	K10866+K10866+K10875+K02328+K07466+K10901+K10901+K10865+K15362+K02327+K03165+K04482+K10881+K03165+K03111
Genetic Information Processing	Folding, sorting and degradation	Sulfur relay system	10	ko04122	g858.t1;g858.t2;g858.t3;g858.t4;g3176.t2;g6559.t1;g6729.t1;g7205.t1;g5922.t1;g5922.t2	K03635+K03635+K03635+K03635+K14168+K11996+K12161+K03637+K04487+K04487
Genetic Information Processing	Replication and repair	Non-homologous end-joining	5	ko03450	g1723.t1;g1723.t2;g5237.t1;g5727.t1;g5680.t1	K10866+K10866+K04799+K10865+K04799
Genetic Information Processing	Information processing in viruses	Virion - Rotavirus	1	ko03271	g5341.t1	K05719
Metabolism	Global and overview maps	Metabolic pathways	793	ko01100	g490.t1;g514.t1;g1991.t1;g4046.t1;g4052.t1;g4069.t1;g4070.t1;g4072.t1;g4073.t1;g4086.t1;g4086.t2;g4086.t3;g4615.t1;g4906.t1;g1888.t1;g1890.t1;g4299.t1;g4307.t1;g4986.t1;g4986.t2;g4992.t1;g4999.t1;g4999.t2;g5003.t1;g5014.t1;g5014.t2;g5019.t1;g5029.t1;g4114.t1;g4124.t1;g4456.t1;g4456.t2;g4458.t1;g1599.t1;g1600.t1;g3785.t1;g3798.t1;g3798.t2;g3800.t1;g1666.t1;g1673.t1;g1675.t1;g1675.t2;g1675.t3;g1679…	K01513+K01179+K00914+K00036+K03960+K00721+K03842+K00721+K03842+K01228+K01228+K01228+K00594+K17497+K01915+K00364+K02133+K01193+K02144+K02144+K11155+K00820+K00820+K00820+K00827+K00827+K00128+K00022+K00888+K03946+K00272+K00272+K00272+K01937+K01937+K03934+K01918+K01918+K00606+K01230+K00109+K11412+K11412+K11412+K01598+K01598+K06125+K05546+K15791+K15791+K00856+K14457+K21797+K01193+K03942+K00966+K00966+…
Metabolism	Global and overview maps	Biosynthesis of secondary metabolites	258	ko01110	g490.t1;g4046.t1;g4906.t1;g1888.t1;g4307.t1;g5014.t1;g5014.t2;g5019.t1;g5029.t1;g4131.t1;g4131.t2;g3798.t1;g3798.t2;g3800.t1;g1690.t1;g1774.t1;g1775.t1;g1257.t1;g237.t1;g237.t3;g249.t1;g249.t2;g3993.t1;g3993.t2;g4002.t1;g4009.t1;g374.t1;g3914.t1;g3914.t2;g996.t1;g1055.t1;g1055.t3;g1077.t1;g1077.t2;g41.t1;g1583.t1;g767.t1;g1858.t1;g1858.t2;g865.t1;g896.t1;g896.t2;g902.t1;g902.t2;g1472.t1;g427.t1;g…	K01513+K00036+K17497+K01915+K01193+K00827+K00827+K00128+K00022+K05955+K05955+K01918+K01918+K00606+K06125+K15791+K15791+K01193+K00966+K00966+K00166+K00166+K01689+K01689+K00789+K17497+K00149+K01490+K01490+K12504+K00750+K00750+K09478+K09478+K06013+K13506+K00699+K00252+K00252+K00281+K13506+K13506+K00993+K00993+K01425+K01115+K00006+K00006+K01187+K00626+K00626+K06013+K06013+K06013+K11540+K01756+K14677+…
Metabolism	Global and overview maps	Microbial metabolism in diverse environments	111	ko01120	g4046.t1;g1888.t1;g5019.t1;g5029.t1;g3993.t1;g3993.t2;g374.t1;g1858.t1;g1858.t2;g5039.t1;g4947.t1;g4947.t2;g2026.t1;g2026.t2;g5268.t1;g5268.t2;g5270.t1;g5279.t1;g5466.t1;g5466.t2;g5577.t1;g2311.t1;g2331.t1;g2383.t1;g2383.t2;g5157.t1;g1348.t1;g2546.t1;g2620.t2;g2620.t3;g2620.t4;g2630.t1;g2803.t1;g3003.t1;g3043.t1;g3133.t1;g3195.t1;g3225.t1;g3225.t2;g3225.t3;g3229.t1;g3229.t2;g3276.t1;g3278.t1;g327…	K00036+K01915+K00128+K00022+K01689+K01689+K00149+K00252+K00252+K00261+K00626+K00626+K01620+K01620+K00626+K00626+K00626+K00235+K01082+K01082+K00134+K00615+K00022+K00029+K00029+K00850+K00026+K00016+K11731+K11731+K11731+K01785+K07127+K00030+K00162+K00164+K13524+K00106+K00106+K00106+K00031+K00031+K00264+K00264+K00264+K00139+K00814+K01835+K01835+K01679+K01679+K00451+K00033+K01783+K00121+K13811+K01807+…
Metabolism	Global and overview maps	Biosynthesis of cofactors	97	ko01240	g4906.t1;g5019.t1;g1599.t1;g1600.t1;g3798.t1;g3798.t2;g3800.t1;g1679.t1;g1679.t2;g1690.t1;g237.t1;g237.t3;g4002.t1;g4009.t1;g4037.t1;g1071.t1;g1071.t2;g767.t1;g858.t1;g858.t2;g858.t3;g858.t4;g1483.t1;g1483.t2;g734.t1;g405.t1;g418.t1;g2114.t1;g2253.t1;g161.t1;g162.t1;g5521.t1;g2338.t1;g2416.t1;g174.t1;g5145.t1;g622.t1;g622.t2;g2697.t1;g3178.t1;g3261.t2;g3313.t1;g3313.t2;g3498.t1;g3508.t1;g3612.t1;…	K17497+K00128+K01937+K01937+K01918+K01918+K00606+K01598+K01598+K06125+K00966+K00966+K00789+K17497+K03801+K10105+K10105+K00699+K03635+K03635+K03635+K03635+K21456+K21456+K15376+K00858+K00072+K11540+K01756+K08681+K06215+K11204+K00457+K15376+K00103+K00963+K00763+K00763+K11205+K01950+K00940+K00699+K00699+K11540+K00012+K06989+K18532+K00940+K00254+K01939+K01939+K00453+K00953+K00953+K00940+K01737+K01737+…
Metabolism	Energy metabolism	Oxidative phosphorylation	79	ko00190	g4052.t1;g4299.t1;g4986.t1;g4986.t2;g4124.t1;g3785.t1;g230.t1;g4007.t1;g4007.t2;g4007.t3;g4007.t4;g5275.t1;g5279.t1;g5327.t1;g5359.t1;g5469.t1;g5524.t1;g5540.t1;g2480.t1;g2480.t2;g2485.t1;g2684.t1;g2684.t2;g2839.t1;g2900.t1;g3396.t1;g3396.t2;g3396.t3;g3434.t1;g3529.t1;g3543.t1;g3544.t2;g8536.t4;g8365.t1;g9074.t3;g5702.t1;g5771.t1;g9537.t1;g6213.t1;g6264.t2;g6264.t3;g6355.t1;g6461.t1;g6461.t2;g647…	K03960+K02133+K02144+K02144+K03946+K03934+K03942+K02136+K02136+K02136+K02136+K00416+K00235+K03951+K03955+K03952+K03959+K03955+K02128+K02128+K02128+K02152+K02152+K08738+K00418+K02154+K02154+K02154+K02130+K03966+K02147+K02140+K02131+K00411+K03950+K03968+K02263+K01507+K02146+K02258+K02258+K03936+K11352+K11352+K02148+K02148+K02150+K03962+K02154+K00415+K02134+K03965+K03943+K03953+K00236+K02127+K03935+…
Metabolism	Global and overview maps	Carbon metabolism	68	ko01200	g4046.t1;g3993.t1;g3993.t2;g865.t1;g5039.t1;g4947.t1;g4947.t2;g5249.t1;g5250.t1;g5268.t1;g5268.t2;g5270.t1;g5279.t1;g5577.t1;g2311.t1;g2383.t1;g2383.t2;g5143.t1;g5157.t1;g1348.t1;g3003.t1;g3043.t1;g3133.t1;g3229.t1;g3229.t2;g3490.t2;g7813.t1;g7813.t2;g8116.t1;g8125.t1;g8435.t1;g8731.t1;g8735.t1;g9053.t1;g9094.t1;g5769.t1;g5775.t1;g6386.t1;g6440.t1;g8841.t1;g6656.t1;g6666.t1;g6765.t1;g6777.t1;g697…	K00036+K01689+K01689+K00281+K00261+K00626+K00626+K00140+K00140+K00626+K00626+K00626+K00235+K00134+K00615+K00029+K00029+K05605+K00850+K00026+K00030+K00162+K00164+K00031+K00031+K00814+K01679+K01679+K00033+K01783+K00121+K01807+K01807+K01895+K00627+K00232+K01810+K00382+K00844+K14454+K00031+K00616+K00927+K01738+K00236+K00844+K00605+K00237+K00161+K00873+K00873+K00873+K00025+K00658+K00658+K00658+K01647+…
Metabolism	Nucleotide metabolism	Purine metabolism	60	ko00230	g490.t1;g1890.t1;g1781.t1;g3914.t1;g3914.t2;g569.t1;g708.t1;g2253.t1;g306.t1;g306.t2;g5382.t1;g5512.t1;g2366.t1;g2407.t1;g5099.t1;g2803.t1;g2821.t1;g2917.t1;g2936.t1;g2936.t2;g2936.t3;g2990.t1;g3225.t1;g3225.t2;g3225.t3;g3261.t2;g3620.t1;g3620.t2;g3720.t1;g7614.t1;g7686.t1;g8551.t1;g8551.t2;g8163.t1;g9017.t1;g9070.t1;g5687.t1;g5688.t1;g5839.t1;g8027.t1;g8028.t1;g6218.t1;g6218.t2;g6279.t1;g7584.t1…	K01513+K00364+K00856+K01490+K01490+K12305+K13988+K01756+K18438+K18438+K10807+K13293+K12319+K19021+K21138+K07127+K00602+K03783+K18437+K18437+K18437+K01081+K00106+K00106+K00106+K00940+K01835+K01835+K18532+K00940+K12304+K01939+K01939+K13811+K08045+K00940+K01519+K01519+K08049+K01519+K01519+K13293+K13293+K12323+K01519+K00942+K00942+K07023+K01511+K01511+K01511+K00759+K12319+K00759+K01769+K00760+K01835+…
Metabolism	Lipid metabolism	Glycerophospholipid metabolism	59	ko00564	g1583.t1;g896.t1;g896.t2;g902.t1;g902.t2;g427.t1;g4228.t1;g4228.t2;g2126.t1;g2126.t2;g2126.t3;g5352.t1;g5570.t1;g2323.t1;g2435.t1;g4342.t1;g4342.t2;g2613.t1;g2613.t2;g2726.t1;g2788.t1;g2983.t1;g3082.t1;g3082.t2;g3160.t1;g3734.t1;g3734.t2;g3750.t1;g7700.t1;g7700.t2;g9147.t1;g9147.t2;g5796.t1;g6553.t1;g5606.t1;g9326.t1;g9377.t1;g6757.t1;g6836.t1;g6836.t2;g6883.t1;g6883.t2;g6907.t1;g6964.t1;g7175.t1…	K13506+K13506+K13506+K00993+K00993+K01115+K00006+K00006+K00894+K00894+K00894+K05929+K00995+K13517+K00901+K01047+K01047+K06129+K06129+K14676+K06128+K00111+K00981+K00981+K00999+K18695+K18695+K01049+K01047+K01047+K01049+K01049+K00993+K14286+K13515+K13509+K01049+K00968+K00901+K00901+K14156+K14156+K00901+K01047+K16860+K13506+K13506+K08729+K13513+K13513+K13514+K16860+K01080+K16860+K16860+K00649+K01049+…
Metabolism	Global and overview maps	Nucleotide metabolism	58	ko01232	g490.t1;g1890.t1;g1599.t1;g1600.t1;g1781.t1;g3914.t1;g3914.t2;g569.t1;g2253.t1;g5382.t1;g4332.t1;g4332.t2;g5096.t1;g5096.t2;g5096.t3;g2855.t1;g2856.t1;g2913.t1;g2917.t1;g2990.t1;g3225.t1;g3225.t2;g3225.t3;g3261.t2;g3435.t1;g3435.t2;g3435.t3;g3435.t4;g3720.t1;g7614.t1;g7686.t1;g8551.t1;g8551.t2;g9070.t1;g5687.t1;g5688.t1;g8027.t1;g8028.t1;g6321.t1;g6368.t1;g7584.t1;g8682.t1;g7783.t1;g7783.t2;g6610…	K01513+K00364+K01937+K01937+K00856+K01490+K01490+K12305+K01756+K10807+K01520+K01520+K01489+K01489+K01489+K00757+K00757+K00876+K03783+K01081+K00106+K00106+K00106+K00940+K00943+K00943+K00943+K00943+K18532+K00940+K12304+K01939+K01939+K00940+K01519+K01519+K01519+K01519+K06287+K13800+K01519+K00857+K00942+K00942+K07023+K00876+K00876+K01511+K01511+K01511+K00759+K01937+K00759+K00760+K00761+K00560+K00939+…
Metabolism	Amino acid metabolism	Lysine degradation	45	ko00310	g5019.t1;g5029.t1;g1774.t1;g1775.t1;g374.t1;g532.t1;g532.t2;g1858.t1;g1858.t2;g914.t1;g914.t2;g4947.t1;g4947.t2;g2149.t1;g5268.t1;g5268.t2;g5270.t1;g2331.t1;g2368.t1;g2368.t2;g2368.t3;g1655.t1;g3186.t1;g3187.t1;g3489.t1;g3615.t1;g8454.t1;g5739.t1;g9263.t1;g9263.t2;g9263.t3;g6386.t1;g5609.t1;g7790.t1;g6575.t1;g9600.t1;g10586.t1;g10586.t2;g10586.t3;g10797.t1;g10797.t3;g10252.t1;g10252.t2;g10480.t1;…	K00128+K00022+K15791+K15791+K00149+K11429+K11429+K00252+K00252+K11427+K11427+K00626+K00626+K11428+K00626+K00626+K00626+K00022+K00471+K00471+K00471+K11420+K14157+K14157+K06101+K11422+K11426+K14085+K11420+K11420+K11420+K00382+K00128+K07515+K13646+K11430+K00658+K00658+K00658+K11429+K11429+K11430+K11430+K11420+K11422
Metabolism	Nucleotide metabolism	Pyrimidine metabolism	44	ko00240	g490.t1;g1599.t1;g1600.t1;g569.t1;g2114.t1;g5345.t1;g5382.t1;g2321.t1;g4332.t1;g4332.t2;g5096.t1;g5096.t2;g5096.t3;g2673.t1;g2674.t1;g2855.t1;g2856.t1;g2913.t1;g2950.t1;g2990.t1;g3261.t2;g3435.t1;g3435.t2;g3435.t3;g3435.t4;g3498.t1;g7614.t1;g8105.t1;g7686.t1;g9070.t1;g6321.t1;g6368.t1;g8682.t1;g6610.t1;g6678.t1;g6678.t2;g7119.t1;g7119.t2;g7119.t3;g7266.t1;g7372.t1;g10015.t1;g10165.t1;g10287.t1	K01513+K01937+K01937+K12305+K11540+K01431+K10807+K16330+K01520+K01520+K01489+K01489+K01489+K00207+K00207+K00757+K00757+K00876+K01464+K01081+K00940+K00943+K00943+K00943+K00943+K11540+K00940+K00254+K12304+K00940+K06287+K13800+K00857+K07023+K00876+K00876+K01511+K01511+K01511+K13421+K01937+K00761+K00560+K01081
Metabolism	Global and overview maps	Biosynthesis of amino acids	43	ko01230	g1888.t1;g3993.t1;g3993.t2;g4002.t1;g2262.t1;g305.t1;g2026.t1;g2026.t2;g5577.t1;g2311.t1;g5157.t1;g2730.t1;g3003.t1;g3229.t1;g3229.t2;g3276.t1;g3278.t1;g3279.t1;g3351.t1;g3418.t1;g3490.t2;g8125.t1;g8731.t1;g8735.t1;g9171.t1;g8018.t1;g6515.t1;g8841.t1;g6656.t1;g6666.t1;g6765.t1;g6777.t1;g9691.t1;g9691.t2;g9691.t3;g10683.t1;g10129.t1;g10153.t1;g10174.t1;g10241.t1;g6099.t1;g7523.t1;g7523.t2	K01915+K01689+K01689+K00789+K14677+K01953+K01620+K01620+K00134+K00615+K00850+K00286+K00030+K00031+K00031+K00264+K00264+K00264+K12657+K00500+K00814+K01783+K01807+K01807+K00286+K01733+K01697+K14454+K00031+K00616+K00927+K01738+K00873+K00873+K00873+K00826+K01647+K01681+K15633+K00600+K01754+K01733+K01733
Metabolism	Carbohydrate metabolism	Inositol phosphate metabolism	42	ko00562	g1991.t1;g4114.t1;g1245.t1;g4635.t1;g732.t1;g732.t2;g417.t1;g283.t2;g5249.t1;g5250.t1;g2394.t1;g2558.t1;g2567.t1;g2579.t1;g2579.t2;g2579.t3;g2711.t2;g2778.t1;g2962.t1;g2962.t2;g3156.t1;g3156.t2;g3160.t1;g3661.t1;g3662.t1;g5724.t1;g6261.t1;g6433.t1;g6772.t1;g6827.t1;g7490.t1;g7490.t2;g10602.t1;g10603.t1;g10099.t1;g10184.t1;g10184.t2;g10184.t3;g10186.t1;g10341.t1;g10341.t2;g10341.t3	K00914+K00888+K21797+K18083+K18081+K18081+K21798+K00915+K00140+K00140+K01116+K21797+K00889+K20278+K20278+K20278+K00889+K01099+K00889+K00889+K05857+K05857+K00999+K00922+K00922+K18082+K01092+K01109+K20279+K00888+K05858+K05858+K05860+K05860+K10572+K13711+K13711+K13711+K13711+K05858+K05858+K05858
Metabolism	Global and overview maps	Fatty acid metabolism	40	ko01212	g5029.t1;g3910.t1;g1077.t1;g1077.t2;g390.t1;g432.t1;g432.t2;g432.t3;g4947.t1;g4947.t2;g5268.t1;g5268.t2;g5270.t1;g5313.t1;g5420.t1;g5477.t1;g5477.t2;g2331.t1;g1942.t1;g1164.t1;g1169.t1;g2603.t1;g2603.t2;g2906.t1;g2906.t2;g3143.t1;g3390.t1;g3390.t2;g8174.t1;g8196.t1;g5769.t1;g7790.t1;g6755.t1;g6800.t1;g6869.t1;g6869.t2;g7122.t1;g7122.t2;g9895.t1;g10858.t1	K00022+K01897+K09478+K09478+K07512+K07512+K07512+K07512+K00626+K00626+K00626+K00626+K00626+K10258+K08765+K10258+K10258+K00022+K09479+K00645+K00645+K07509+K07509+K10258+K10258+K08766+K08764+K08764+K00507+K10203+K00232+K07515+K10703+K00665+K12405+K12405+K01074+K01074+K07508+K01897
Metabolism	Glycan biosynthesis and metabolism	N-Glycan biosynthesis	38	ko00510	g4069.t1;g4070.t1;g4072.t1;g4073.t1;g4086.t1;g4086.t2;g4086.t3;g1666.t1;g1706.t1;g898.t1;g5037.t1;g434.t1;g2249.t1;g2249.t2;g5362.t1;g5362.t2;g5362.t3;g5505.t1;g2302.t1;g4344.t1;g5104.t1;g5104.t2;g5105.t1;g5105.t2;g5118.t1;g5118.t2;g3362.t1;g3362.t2;g8175.t1;g8211.t1;g9394.t1;g9396.t1;g9739.t1;g10781.t1;g10033.t1;g10033.t3;g10245.t1;g10498.t1	K00721+K03842+K00721+K03842+K01228+K01228+K01228+K01230+K05546+K03843+K01228+K12670+K00726+K00726+K03848+K03848+K03848+K03846+K12669+K00717+K12667+K12667+K12667+K12667+K12668+K12668+K03849+K03849+K12666+K01230+K00717+K00717+K07967+K07441+K03844+K03844+K01001+K03850
Metabolism	Carbohydrate metabolism	Amino sugar and nucleotide sugar metabolism	38	ko00520	g4906.t1;g4999.t1;g4999.t2;g5003.t1;g237.t1;g237.t3;g4009.t1;g4637.t1;g4637.t2;g5532.t1;g5145.t1;g4556.t1;g3034.t1;g3049.t1;g3049.t2;g3169.t1;g3508.t1;g3620.t1;g3620.t2;g3744.t1;g3744.t2;g7677.t1;g5775.t1;g8025.t1;g8025.t2;g6440.t1;g7582.t1;g6620.t1;g7078.t1;g7099.t1;g7274.t1;g7408.t1;g10690.t1;g10738.t1;g9977.t1;g9977.t2;g10231.t1;g10276.t1	K17497+K00820+K00820+K00820+K00966+K00966+K17497+K01711+K01711+K00698+K00963+K12450+K01784+K00972+K00972+K00698+K00012+K01835+K01835+K00884+K00884+K18674+K01810+K00326+K00326+K00844+K00326+K00963+K00844+K01836+K00326+K01183+K00621+K01443+K00966+K00966+K01835+K00976
Metabolism	Amino acid metabolism	Valine, leucine and isoleucine degradation	36	ko00280	g5014.t1;g5014.t2;g5019.t1;g5029.t1;g249.t1;g249.t2;g374.t1;g1077.t1;g1077.t2;g4947.t1;g4947.t2;g5249.t1;g5250.t1;g5268.t1;g5268.t2;g5270.t1;g2331.t1;g2388.t1;g5143.t1;g2603.t1;g2603.t2;g2705.t1;g3195.t1;g3295.t1;g8160.t1;g5739.t1;g6386.t1;g5609.t1;g9378.t1;g9378.t2;g9420.t1;g7790.t1;g7417.t1;g9895.t1;g10683.t1;g10345.t1	K00827+K00827+K00128+K00022+K00166+K00166+K00149+K09478+K09478+K00626+K00626+K00140+K00140+K00626+K00626+K00626+K00022+K11538+K05605+K07509+K07509+K01968+K13524+K05607+K08683+K14085+K00382+K00128+K01640+K01640+K00020+K07515+K01907+K07508+K00826+K01641
Metabolism	Xenobiotics biodegradation and metabolism	Drug metabolism - other enzymes	34	ko00983	g767.t1;g5345.t1;g5382.t1;g4332.t1;g4332.t2;g5096.t1;g5096.t2;g5096.t3;g2673.t1;g2674.t1;g2855.t1;g2856.t1;g2913.t1;g2950.t1;g3225.t1;g3225.t2;g3225.t3;g3261.t2;g3313.t1;g3313.t2;g7614.t1;g9070.t1;g5687.t1;g5688.t1;g8027.t1;g8028.t1;g6368.t1;g7584.t1;g8682.t1;g6678.t1;g6678.t2;g7266.t1;g7405.t1;g9932.t1	K00699+K01431+K10807+K01520+K01520+K01489+K01489+K01489+K00207+K00207+K00757+K00757+K00876+K01464+K00106+K00106+K00106+K00940+K00699+K00699+K00940+K00940+K01519+K01519+K01519+K01519+K13800+K01519+K00857+K00876+K00876+K13421+K00799+K00760
Metabolism	Global and overview maps	Biosynthesis of nucleotide sugars	33	ko01250	g4906.t1;g4999.t1;g4999.t2;g5003.t1;g237.t1;g237.t3;g4009.t1;g4637.t1;g4637.t2;g5145.t1;g4556.t1;g3034.t1;g3049.t1;g3049.t2;g3508.t1;g3620.t1;g3620.t2;g3744.t1;g3744.t2;g7677.t1;g5775.t1;g6440.t1;g6620.t1;g6921.t1;g6921.t2;g6989.t1;g7078.t1;g7099.t1;g10690.t1;g9977.t1;g9977.t2;g10231.t1;g10276.t1	K17497+K00820+K00820+K00820+K00966+K00966+K17497+K01711+K01711+K00963+K12450+K01784+K00972+K00972+K00012+K01835+K01835+K00884+K00884+K18674+K01810+K00844+K00963+K01710+K01710+K01790+K00844+K01836+K00621+K00966+K00966+K01835+K00976
Metabolism	Metabolism of other amino acids	Glutathione metabolism	32	ko00480	g4046.t1;g1483.t1;g1483.t2;g1972.t1;g5245.t1;g5382.t1;g5521.t1;g5538.t1;g5538.t2;g5538.t3;g2320.t1;g2697.t1;g3229.t1;g3229.t2;g3309.t1;g8797.t1;g8116.t1;g6313.t1;g6313.t2;g9408.t1;g9508.t1;g6656.t1;g7105.t1;g7105.t2;g7405.t1;g9860.t1;g9860.t2;g9860.t3;g10441.t1;g10441.t2;g5959.t1;g5959.t2	K00036+K21456+K21456+K18592+K00682+K10807+K11204+K00797+K00797+K00797+K00383+K11205+K00031+K00031+K01469+K18592+K00033+K05360+K05360+K00681+K11188+K00031+K11140+K11140+K00799+K00682+K00682+K00682+K01581+K01581+K18592+K18592
Metabolism	Lipid metabolism	Glycerolipid metabolism	32	ko00561	g4992.t1;g5019.t1;g1231.t1;g374.t1;g1583.t1;g896.t1;g896.t2;g5467.t1;g2323.t1;g2435.t1;g2749.t1;g2749.t2;g5739.t1;g5609.t1;g9326.t1;g9442.t1;g9442.t2;g9442.t3;g7776.t1;g7776.t2;g6836.t1;g6836.t2;g6907.t1;g7269.t1;g7269.t2;g7370.t1;g7370.t2;g7446.t1;g7447.t1;g9701.t1;g9826.t1;g10183.t1	K11155+K00128+K14457+K00149+K13506+K13506+K13506+K00864+K13517+K00901+K13534+K13534+K14085+K00128+K13509+K14457+K14457+K14457+K00864+K00864+K00901+K00901+K00901+K00011+K00011+K13506+K13506+K13513+K13513+K14457+K01080+K12298
Metabolism	Amino acid metabolism	Cysteine and methionine metabolism	30	ko00270	g5014.t1;g5014.t2;g4002.t1;g1483.t1;g1483.t2;g2027.t1;g5421.t1;g5521.t1;g5538.t1;g5538.t2;g5538.t3;g1348.t1;g2546.t1;g2620.t1;g2620.t5;g2697.t1;g2790.t1;g2937.t1;g6515.t1;g8841.t1;g6777.t1;g7444.t1;g10569.t1;g10683.t1;g10803.t1;g10803.t2;g10889.t1;g10931.t1;g10996.t1;g6093.t1	K00827+K00827+K00789+K21456+K21456+K00547+K00772+K11204+K00797+K00797+K00797+K00026+K00016+K08964+K08964+K11205+K00816+K01251+K01697+K14454+K01738+K08967+K00025+K00826+K08967+K08967+K00547+K00815+K08964+K08963
Metabolism	Amino acid metabolism	Tryptophan metabolism	30	ko00380	g5019.t1;g5029.t1;g1774.t1;g1775.t1;g374.t1;g1858.t1;g1858.t2;g4947.t1;g4947.t2;g2033.t1;g2033.t2;g5268.t1;g5268.t2;g5270.t1;g2331.t1;g2790.t1;g3458.t1;g3458.t2;g3616.t1;g7973.t1;g5739.t1;g6386.t1;g5609.t1;g7790.t1;g6942.t1;g6942.t2;g10586.t1;g10586.t2;g10586.t3;g6129.t1	K00128+K00022+K15791+K15791+K00149+K00252+K00252+K00626+K00626+K00502+K00502+K00626+K00626+K00626+K00022+K00816+K01593+K01593+K01593+K00453+K14085+K00382+K00128+K07515+K01556+K01556+K00658+K00658+K00658+K03781
Metabolism	Carbohydrate metabolism	Glycolysis / Gluconeogenesis	28	ko00010	g5019.t1;g3993.t1;g3993.t2;g374.t1;g5577.t1;g5157.t1;g2546.t1;g2630.t1;g3043.t1;g3620.t1;g3620.t2;g8435.t1;g9053.t1;g9094.t1;g5739.t1;g5775.t1;g6386.t1;g6440.t1;g5609.t1;g6765.t1;g7078.t1;g7228.t1;g9691.t1;g9691.t2;g9691.t3;g10174.t1;g10231.t1;g5985.t1	K00128+K01689+K01689+K00149+K00134+K00850+K00016+K01785+K00162+K01835+K01835+K00121+K01895+K00627+K14085+K01810+K00382+K00844+K00128+K00927+K00844+K00161+K00873+K00873+K00873+K15633+K01835+K01596
Metabolism	Carbohydrate metabolism	Pyruvate metabolism	28	ko00620	g5019.t1;g374.t1;g4947.t1;g4947.t2;g5268.t1;g5268.t2;g5270.t1;g2383.t1;g2383.t2;g2417.t1;g1348.t1;g2546.t1;g3043.t1;g3548.t1;g7813.t1;g7813.t2;g8435.t1;g9053.t1;g9094.t1;g5739.t1;g6386.t1;g5609.t1;g7228.t1;g9691.t1;g9691.t2;g9691.t3;g10569.t1;g5985.t1	K00128+K00149+K00626+K00626+K00626+K00626+K00626+K00029+K00029+K01759+K00026+K00016+K00162+K01069+K01679+K01679+K00121+K01895+K00627+K14085+K00382+K00128+K00161+K00873+K00873+K00873+K00025+K01596
Metabolism	Carbohydrate metabolism	Starch and sucrose metabolism	27	ko00500	g490.t1;g514.t1;g4307.t1;g1257.t1;g3909.t1;g1055.t1;g1055.t3;g4939.t1;g5529.t1;g5145.t1;g3211.t1;g3515.t1;g3515.t2;g3572.t1;g3620.t1;g3620.t2;g3754.t1;g3754.t2;g5775.t1;g6440.t1;g6620.t1;g7078.t1;g10607.t1;g10607.t2;g10607.t3;g10231.t1;g6120.t1	K01513+K01179+K01193+K01193+K01179+K00750+K00750+K01187+K00700+K00963+K01187+K01194+K01194+K00693+K01835+K01835+K01196+K01196+K01810+K00844+K00963+K00844+K01194+K01194+K01194+K01835+K00688
Metabolism	Lipid metabolism	Fatty acid degradation	26	ko00071	g5019.t1;g5029.t1;g374.t1;g3910.t1;g1077.t1;g1077.t2;g1858.t1;g1858.t2;g4947.t1;g4947.t2;g5268.t1;g5268.t2;g5270.t1;g5420.t1;g2331.t1;g1942.t1;g2603.t1;g2603.t2;g3143.t1;g8435.t1;g5739.t1;g5769.t1;g5609.t1;g7790.t1;g9895.t1;g10858.t1	K00128+K00022+K00149+K01897+K09478+K09478+K00252+K00252+K00626+K00626+K00626+K00626+K00626+K08765+K00022+K09479+K07509+K07509+K08766+K00121+K14085+K00232+K00128+K07515+K07508+K01897
Metabolism	Lipid metabolism	Sphingolipid metabolism	26	ko00600	g406.t1;g2145.t1;g2146.t1;g2237.t1;g2272.t1;g2907.t1;g3308.t1;g9090.t1;g5690.t1;g5691.t1;g8266.t1;g6411.t1;g6652.t1;g6724.t1;g6724.t2;g7237.t1;g7254.t1;g7478.t1;g9784.t1;g9826.t1;g10684.t1;g10684.t2;g9952.t1;g10298.t1;g9287.t1;g9288.t1	K00720+K01201+K01201+K01201+K01634+K01634+K01441+K00654+K12351+K12351+K01201+K04714+K12350+K04714+K04714+K04718+K01201+K04712+K04710+K01080+K04714+K04714+K12309+K00654+K01201+K01201
Metabolism	Carbohydrate metabolism	Citrate cycle (TCA cycle)	25	ko00020	g5279.t1;g1348.t1;g3003.t1;g3043.t1;g3133.t1;g3229.t1;g3229.t2;g7813.t1;g7813.t2;g9094.t1;g6386.t1;g6656.t1;g6906.t1;g6970.t1;g7224.t1;g7228.t1;g10569.t1;g10586.t1;g10586.t2;g10586.t3;g10129.t1;g10153.t1;g10478.t1;g10478.t2;g5985.t1	K00235+K00026+K00030+K00162+K00164+K00031+K00031+K01679+K01679+K00627+K00382+K00031+K01648+K00236+K00237+K00161+K00025+K00658+K00658+K00658+K01647+K01681+K01900+K01900+K01596
Metabolism	Amino acid metabolism	Alanine, aspartate and glutamate metabolism	25	ko00250	g1888.t1;g4999.t1;g4999.t2;g5003.t1;g5014.t1;g5014.t2;g4456.t1;g4456.t2;g4458.t1;g1472.t1;g5039.t1;g2114.t1;g2253.t1;g305.t1;g3195.t1;g3276.t1;g3278.t1;g3279.t1;g3443.t1;g3490.t2;g3498.t1;g8551.t1;g8551.t2;g5634.t1;g8841.t1	K01915+K00820+K00820+K00820+K00827+K00827+K00272+K00272+K00272+K01425+K00261+K11540+K01756+K01953+K13524+K00264+K00264+K00264+K00139+K00814+K11540+K01939+K01939+K00294+K14454
Metabolism	Glycan biosynthesis and metabolism	Various types of N-glycan biosynthesis	25	ko00513	g4070.t1;g4073.t1;g1666.t1;g898.t1;g434.t1;g2249.t1;g2249.t2;g5505.t1;g2302.t1;g2410.t3;g4344.t1;g5104.t1;g5104.t2;g5105.t1;g5105.t2;g5118.t1;g5118.t2;g8175.t1;g8211.t1;g9394.t1;g9396.t1;g9739.t1;g10781.t1;g10033.t1;g10033.t3	K03842+K03842+K01230+K03843+K12670+K00726+K00726+K03846+K12669+K14464+K00717+K12667+K12667+K12667+K12667+K12668+K12668+K12666+K01230+K00717+K00717+K07967+K07441+K03844+K03844
Metabolism	Metabolism of cofactors and vitamins	Folate biosynthesis	25	ko00790	g1021.t1;g1022.t1;g858.t1;g858.t2;g858.t3;g858.t4;g734.t1;g418.t1;g2033.t1;g2033.t2;g5556.t1;g5558.t1;g5558.t2;g2416.t1;g3418.t1;g9003.t1;g9003.t2;g9134.t1;g9134.t2;g5784.t1;g7205.t1;g7206.t1;g7206.t2;g7269.t1;g7269.t2	K15631+K15631+K03635+K03635+K03635+K03635+K15376+K00072+K00502+K00502+K00501+K00501+K00501+K15376+K00500+K01724+K01724+K01737+K01737+K00079+K03637+K20967+K20967+K00011+K00011
Metabolism	Metabolism of terpenoids and polyketides	Terpenoid backbone biosynthesis	25	ko00900	g4131.t1;g4131.t2;g996.t1;g41.t1;g4947.t1;g4947.t2;g2066.t1;g2066.t2;g2068.t1;g5268.t1;g5268.t2;g5270.t1;g2292.t1;g2292.t2;g5146.t1;g2521.t1;g2521.t2;g8040.t1;g8040.t2;g6399.t1;g7598.t1;g7598.t2;g9746.t1;g9746.t3;g10345.t1	K05955+K05955+K12504+K06013+K00626+K00626+K06013+K06013+K06013+K00626+K00626+K00626+K00021+K00021+K00869+K11778+K11778+K06013+K06013+K01823+K00869+K00869+K01597+K01597+K01641
Metabolism	Global and overview maps	2-Oxocarboxylic acid metabolism	24	ko01210	g5014.t1;g5014.t2;g1774.t1;g1775.t1;g249.t1;g249.t2;g2262.t1;g3003.t1;g3043.t1;g3133.t1;g3229.t1;g3229.t2;g3490.t2;g9094.t1;g6386.t1;g8841.t1;g6656.t1;g7228.t1;g10586.t1;g10586.t2;g10586.t3;g10683.t1;g10129.t1;g10153.t1	K00827+K00827+K15791+K15791+K00166+K00166+K14677+K00030+K00162+K00164+K00031+K00031+K00814+K00627+K00382+K14454+K00031+K00161+K00658+K00658+K00658+K00826+K01647+K01681
Metabolism	Carbohydrate metabolism	Fructose and mannose metabolism	21	ko00051	g4615.t1;g4906.t1;g237.t1;g237.t3;g4009.t1;g4637.t1;g4637.t2;g414.t1;g4390.t1;g5157.t1;g6440.t1;g7078.t1;g7269.t1;g7269.t2;g7432.t1;g9806.t1;g9806.t2;g9806.t3;g9977.t1;g9977.t2;g10276.t1	K00594+K17497+K00966+K00966+K17497+K01711+K01711+K19029+K00594+K00850+K00844+K00844+K00011+K00011+K00846+K00594+K00594+K00594+K00966+K00966+K00976
Metabolism	Amino acid metabolism	Arginine and proline metabolism	21	ko00330	g5019.t1;g374.t1;g5538.t1;g5538.t2;g5538.t3;g2523.t1;g2537.t1;g2537.t2;g2730.t1;g3128.t1;g3351.t1;g7819.t1;g9171.t1;g5739.t1;g5609.t1;g5634.t1;g8841.t1;g6882.t1;g10306.t1;g10441.t1;g10441.t2	K00128+K00149+K00797+K00797+K00797+K00318+K00657+K00657+K00286+K00472+K12657+K00472+K00286+K14085+K00128+K00294+K14454+K00819+K00318+K01581+K01581
Metabolism	Metabolism of cofactors and vitamins	Pantothenate and CoA biosynthesis	20	ko00770	g490.t1;g5019.t1;g3798.t1;g3798.t2;g3800.t1;g1679.t1;g1679.t2;g5345.t1;g2673.t1;g2674.t1;g2950.t1;g5795.t1;g5609.t1;g10683.t1;g10831.t1;g10831.t2;g10831.t3;g10927.t1;g10927.t2;g10979.t1	K01513+K00128+K01918+K01918+K00606+K01598+K01598+K01431+K00207+K00207+K01464+K02318+K00128+K00826+K09680+K09680+K09680+K01922+K01922+K06133
Metabolism	Lipid metabolism	Fatty acid elongation	19	ko00062	g5029.t1;g390.t1;g432.t1;g432.t2;g432.t3;g5313.t1;g5477.t1;g5477.t2;g2331.t1;g2603.t1;g2603.t2;g2906.t1;g2906.t2;g8196.t1;g7790.t1;g6755.t1;g7122.t1;g7122.t2;g9895.t1	K00022+K07512+K07512+K07512+K07512+K10258+K10258+K10258+K00022+K07509+K07509+K10258+K10258+K10203+K07515+K10703+K01074+K01074+K07508
Metabolism	Carbohydrate metabolism	Glyoxylate and dicarboxylate metabolism	19	ko00630	g1888.t1;g865.t1;g4947.t1;g4947.t2;g5268.t1;g5268.t2;g5270.t1;g1348.t1;g9053.t1;g6386.t1;g7200.t1;g10569.t1;g10129.t1;g10153.t1;g10241.t1;g10264.t1;g10483.t1;g10500.t1;g6129.t1	K01915+K00281+K00626+K00626+K00626+K00626+K00626+K00026+K01895+K00382+K00605+K00025+K01647+K01681+K00600+K19269+K01637+K02437+K03781
Metabolism	Metabolism of cofactors and vitamins	Lipoic acid metabolism	19	ko00785	g1774.t1;g1775.t1;g249.t1;g249.t2;g4037.t1;g1071.t1;g1071.t2;g865.t1;g3043.t1;g3133.t1;g9094.t1;g6386.t1;g7200.t1;g7228.t1;g10586.t1;g10586.t2;g10586.t3;g10785.t1;g10500.t1	K15791+K15791+K00166+K00166+K03801+K10105+K10105+K00281+K00162+K00164+K00627+K00382+K00605+K00161+K00658+K00658+K00658+K03644+K02437
Metabolism	Carbohydrate metabolism	Galactose metabolism	18	ko00052	g4307.t1;g1257.t1;g4939.t1;g5145.t1;g5157.t1;g2630.t1;g3034.t1;g3211.t1;g3620.t1;g3620.t2;g6440.t1;g6620.t1;g7078.t1;g7269.t1;g7269.t2;g9739.t1;g9952.t1;g10231.t1	K01193+K01193+K01187+K00963+K00850+K01785+K01784+K01187+K01835+K01835+K00844+K00963+K00844+K00011+K00011+K07967+K12309+K01835
Metabolism	Amino acid metabolism	Glycine, serine and threonine metabolism	18	ko00260	g5014.t1;g5014.t2;g865.t1;g2026.t1;g2026.t2;g3549.t1;g3549.t2;g5739.t1;g8018.t1;g6386.t1;g6515.t1;g7200.t1;g10174.t1;g10241.t1;g10500.t1;g6099.t1;g7523.t1;g7523.t2	K00827+K00827+K00281+K01620+K01620+K00108+K00108+K14085+K01733+K00382+K01697+K00605+K15633+K00600+K02437+K01754+K01733+K01733
Metabolism	Glycan biosynthesis and metabolism	Other glycan degradation	18	ko00511	g1903.t1;g1903.t2;g3918.t1;g551.t1;g551.t2;g2145.t1;g2146.t1;g2237.t1;g8203.t1;g9133.t1;g8266.t1;g9466.t1;g7254.t1;g7472.t1;g9952.t1;g10220.t1;g9287.t1;g9288.t1	K01444+K01444+K01206+K01227+K01227+K01201+K01201+K01201+K12311+K01206+K01201+K01227+K01201+K01191+K12309+K01191+K01201+K01201
Metabolism	Metabolism of cofactors and vitamins	Nicotinate and nicotinamide metabolism	18	ko00760	g490.t1;g1675.t1;g1675.t2;g1675.t3;g405.t1;g622.t1;g622.t2;g2917.t1;g2990.t1;g3178.t1;g3612.t1;g3694.t1;g3694.t2;g6387.t1;g6472.t1;g10587.t1;g10587.t2;g10287.t1	K01513+K11412+K11412+K11412+K00858+K00763+K00763+K03783+K01081+K01950+K06989+K11416+K11416+K11411+K00858+K00541+K00541+K01081
Metabolism	Amino acid metabolism	Tyrosine metabolism	17	ko00350	g5556.t1;g5558.t1;g5558.t2;g2338.t1;g5069.t1;g3458.t1;g3458.t2;g3540.t1;g3616.t1;g8100.t1;g8435.t1;g5723.t1;g5899.t1;g8841.t1;g6901.t1;g10931.t1;g6100.t1	K00501+K00501+K00501+K00457+K00505+K01593+K01593+K00503+K01593+K00451+K00121+K00457+K00505+K14454+K01555+K00815+K01557
Metabolism	Lipid metabolism	Ether lipid metabolism	17	ko00565	g902.t1;g902.t2;g427.t1;g4342.t1;g4342.t2;g7831.t1;g7700.t1;g7700.t2;g5796.t1;g6964.t1;g7175.t1;g9725.t1;g9826.t1;g10778.t1;g10860.t1;g10900.t1;g10900.t2	K00993+K00993+K01115+K01047+K01047+K16794+K01047+K01047+K00993+K01047+K16860+K16860+K01080+K00803+K08743+K16860+K16860
Metabolism	Metabolism of other amino acids	beta-Alanine metabolism	16	ko00410	g5019.t1;g3798.t1;g3798.t2;g374.t1;g5249.t1;g5250.t1;g5345.t1;g5143.t1;g2673.t1;g2674.t1;g2950.t1;g3195.t1;g5739.t1;g5769.t1;g5609.t1;g7790.t1	K00128+K01918+K01918+K00149+K00140+K00140+K01431+K05605+K00207+K00207+K01464+K13524+K14085+K00232+K00128+K07515
Metabolism	Carbohydrate metabolism	Pentose and glucuronate interconversions	15	ko00040	g4615.t1;g767.t1;g4390.t1;g5145.t1;g3313.t1;g3313.t2;g3508.t1;g8125.t1;g6620.t1;g7269.t1;g7269.t2;g9670.t1;g9806.t1;g9806.t2;g9806.t3	K00594+K00699+K00594+K00963+K00699+K00699+K00012+K01783+K00963+K00011+K00011+K01728+K00594+K00594+K00594
Metabolism	Glycan biosynthesis and metabolism	Other types of O-glycan biosynthesis	15	ko00514	g4640.t1;g2607.t1;g3681.t1;g7817.t1;g7674.t1;g5767.t1;g5767.t2;g5813.t1;g5815.t1;g5816.t1;g6554.t1;g6575.t1;g6955.t2;g9739.t1;g10440.t1	K00710+K00710+K00731+K00710+K00710+K00710+K00710+K00710+K00710+K00710+K00710+K13646+K00731+K07967+K09667
Metabolism	Carbohydrate metabolism	Butanoate metabolism	15	ko00650	g5029.t1;g1673.t1;g4947.t1;g4947.t2;g5268.t1;g5268.t2;g5270.t1;g2331.t1;g3195.t1;g3443.t1;g9378.t1;g9378.t2;g7790.t1;g7417.t1;g10345.t1	K00022+K00109+K00626+K00626+K00626+K00626+K00626+K00022+K13524+K00139+K01640+K01640+K07515+K01907+K01641
Metabolism	Carbohydrate metabolism	Pentose phosphate pathway	14	ko00030	g4046.t1;g5317.t1;g2311.t1;g5157.t1;g3620.t1;g3620.t2;g8116.t1;g8125.t1;g8731.t1;g8735.t1;g5775.t1;g6666.t1;g10231.t1;g6118.t1	K00036+K01619+K00615+K00850+K01835+K01835+K00033+K01783+K01807+K01807+K01810+K00616+K01835+K01057
Metabolism	Amino acid metabolism	Histidine metabolism	13	ko00340	g5019.t1;g374.t1;g2584.t1;g2720.t1;g2722.t1;g2722.t2;g5739.t1;g5609.t1;g5669.t1;g5669.t2;g6064.t1;g6065.t1;g6065.t2	K00128+K00149+K01712+K01468+K01468+K01468+K14085+K00128+K19787+K19787+K01745+K01745+K01745
Metabolism	Carbohydrate metabolism	Propanoate metabolism	13	ko00640	g249.t1;g249.t2;g5249.t1;g5250.t1;g5143.t1;g2546.t1;g3195.t1;g9053.t1;g5769.t1;g6386.t1;g7790.t1;g10478.t1;g10478.t2	K00166+K00166+K00140+K00140+K05605+K00016+K13524+K01895+K00232+K00382+K07515+K01900+K01900
Metabolism	Energy metabolism	Carbon fixation by Calvin cycle	13	ko00710	g5577.t1;g2311.t1;g2383.t1;g2383.t2;g1348.t1;g3490.t2;g8125.t1;g8731.t1;g8735.t1;g8841.t1;g6666.t1;g6765.t1;g10569.t1	K00134+K00615+K00029+K00029+K00026+K00814+K01783+K01807+K01807+K14454+K00616+K00927+K00025
Metabolism	Energy metabolism	Other carbon fixation pathways	13	ko00720	g4947.t1;g4947.t2;g5268.t1;g5268.t2;g5270.t1;g3229.t1;g3229.t2;g7813.t1;g7813.t2;g9053.t1;g6656.t1;g6906.t1;g10153.t1	K00626+K00626+K00626+K00626+K00626+K00031+K00031+K01679+K01679+K01895+K00031+K01648+K01681
Metabolism	Lipid metabolism	Biosynthesis of unsaturated fatty acids	13	ko01040	g5313.t1;g5477.t1;g5477.t2;g2906.t1;g2906.t2;g3390.t1;g3390.t2;g8174.t1;g8196.t1;g5769.t1;g6755.t1;g6869.t1;g6869.t2	K10258+K10258+K10258+K10258+K10258+K08764+K08764+K00507+K10203+K00232+K10703+K12405+K12405
Metabolism	Glycan biosynthesis and metabolism	Mucin type O-glycan biosynthesis	12	ko00512	g4640.t1;g2607.t1;g3681.t1;g7817.t1;g7674.t1;g5767.t1;g5767.t2;g5813.t1;g5815.t1;g5816.t1;g6554.t1;g6955.t2	K00710+K00710+K00731+K00710+K00710+K00710+K00710+K00710+K00710+K00710+K00710+K00731
Metabolism	Glycan biosynthesis and metabolism	Glycosaminoglycan biosynthesis - heparan sulfate / heparin	12	ko00534	g5232.t1;g5323.t1;g2789.t1;g3164.t1;g3164.t2;g5675.t1;g7326.t1;g7326.t2;g10753.t1;g10053.t1;g10053.t2;g9269.t1	K02514+K01793+K02370+K02576+K02578+K02514+K00771+K00771+K00733+K00733+K00733+K00733
Metabolism	Lipid metabolism	Arachidonic acid metabolism	12	ko00590	g1972.t1;g4342.t1;g4342.t2;g8797.t1;g7700.t1;g7700.t2;g5784.t1;g6964.t1;g9882.t2;g5959.t1;g5959.t2;g5987.t1	K18592+K01047+K01047+K18592+K01047+K01047+K00079+K01047+K19246+K18592+K18592+K15730
Metabolism	Energy metabolism	Sulfur metabolism	12	ko00920	g5466.t1;g5466.t2;g8163.t1;g5910.t3;g9468.t4;g9468.t5;g6777.t1;g10532.t1;g10364.t1;g10364.t2;g10364.t3;g10511.t2	K01082+K01082+K13811+K22470+K17285+K17285+K01738+K15759+K00387+K00387+K00387+K22470
Metabolism	Glycan biosynthesis and metabolism	Glycosylphosphatidylinositol (GPI)-anchor biosynthesis	10	ko00563	g4647.t1;g254.t1;g8121.t1;g8122.t5;g9162.t1;g9162.t2;g9406.t3;g8850.t1;g8850.t2;g9937.t1	K05290+K05290+K05288+K05288+K05293+K05293+K05292+K05283+K05283+K05284
Metabolism	Metabolism of cofactors and vitamins	Thiamine metabolism	10	ko00730	g3051.t1;g3051.t2;g3051.t3;g7391.t1;g9819.t1;g9819.t2;g9819.t3;g10247.t1;g5922.t1;g5922.t2	K14394+K14394+K14394+K03146+K03707+K03707+K03707+K00939+K04487+K04487
Metabolism	Metabolism of cofactors and vitamins	Riboflavin metabolism	10	ko00740	g490.t1;g577.t1;g2042.t1;g1923.t1;g3051.t1;g3051.t2;g3051.t3;g9033.t1;g9033.t2;g8059.t1	K01513+K14410+K14410+K14379+K14394+K14394+K14394+K00953+K00953+K14410
Metabolism	Biosynthesis of other secondary metabolites	Isoquinoline alkaloid biosynthesis	10	ko00950	g5556.t1;g5558.t1;g5558.t2;g5069.t1;g3458.t1;g3458.t2;g3616.t1;g5899.t1;g8841.t1;g10931.t1	K00501+K00501+K00501+K00505+K01593+K01593+K01593+K00505+K14454+K00815
Metabolism	Carbohydrate metabolism	Ascorbate and aldarate metabolism	9	ko00053	g5019.t1;g374.t1;g767.t1;g174.t1;g3313.t1;g3313.t2;g3508.t1;g5739.t1;g5609.t1	K00128+K00149+K00699+K00103+K00699+K00699+K00012+K14085+K00128
Metabolism	Lipid metabolism	Fatty acid biosynthesis	9	ko00061	g3910.t1;g390.t1;g432.t1;g432.t2;g432.t3;g1164.t1;g1169.t1;g6800.t1;g10858.t1	K01897+K07512+K07512+K07512+K07512+K00645+K00645+K00665+K01897
Metabolism	Biosynthesis of other secondary metabolites	Streptomycin biosynthesis	9	ko00521	g3620.t1;g3620.t2;g6261.t1;g6440.t1;g6921.t1;g6921.t2;g6989.t1;g7078.t1;g10231.t1	K01835+K01835+K01092+K00844+K01710+K01710+K01790+K00844+K01835
Metabolism	Glycan biosynthesis and metabolism	O-Antigen nucleotide sugar biosynthesis	9	ko00541	g4637.t1;g4637.t2;g5145.t1;g3034.t1;g3508.t1;g6620.t1;g6921.t1;g6921.t2;g6989.t1	K01711+K01711+K00963+K01784+K00012+K00963+K01710+K01710+K01790
Metabolism	Metabolism of cofactors and vitamins	Porphyrin metabolism	9	ko00860	g1868.t1;g1136.t1;g767.t1;g3313.t1;g3313.t2;g7287.t1;g7287.t2;g7330.t1;g7331.t1	K00522+K00522+K00699+K00699+K00699+K01885+K01885+K01764+K02259
Metabolism	Energy metabolism	Nitrogen metabolism	9	ko00910	g1888.t1;g5039.t1;g190.t1;g3276.t1;g3278.t1;g3279.t1;g6941.t1;g7124.t1;g9615.t1	K01915+K00261+K01674+K00264+K00264+K00264+K01672+K01672+K01725
Metabolism	Lipid metabolism	Steroid hormone biosynthesis	8	ko00140	g767.t1;g4806.t1;g3313.t1;g3313.t2;g7494.t1;g9583.t1;g9991.t1;g9991.t2	K00699+K00513+K00699+K00699+K01131+K07424+K12343+K12343
Metabolism	Amino acid metabolism	Arginine biosynthesis	8	ko00220	g1888.t1;g1472.t1;g5039.t1;g2114.t1;g2262.t1;g3490.t2;g3498.t1;g8841.t1	K01915+K01425+K00261+K11540+K14677+K00814+K11540+K14454
Metabolism	Amino acid metabolism	Phenylalanine metabolism	8	ko00360	g2338.t1;g3418.t1;g3458.t1;g3458.t2;g3616.t1;g5723.t1;g8841.t1;g10931.t1	K00457+K00500+K01593+K01593+K01593+K00457+K14454+K00815
Metabolism	Metabolism of cofactors and vitamins	Retinol metabolism	8	ko00830	g4992.t1;g767.t1;g3313.t1;g3313.t2;g8435.t1;g9463.t1;g9583.t1;g9660.t1	K11155+K00699+K00699+K00699+K00121+K11147+K07424+K11154
Metabolism	Xenobiotics biodegradation and metabolism	Benzoate degradation	7	ko00362	g1858.t1;g1858.t2;g4947.t1;g4947.t2;g5268.t1;g5268.t2;g5270.t1	K00252+K00252+K00626+K00626+K00626+K00626+K00626
Metabolism	Metabolism of other amino acids	Taurine and hypotaurine metabolism	7	ko00430	g1972.t1;g4768.t1;g8797.t1;g9408.t1;g7503.t1;g5959.t1;g5959.t2	K18592+K00485+K18592+K00681+K00485+K18592+K18592
Metabolism	Glycan biosynthesis and metabolism	Glycosaminoglycan biosynthesis - chondroitin sulfate / dermatan sulfate	7	ko00532	g9141.t1;g7326.t1;g7326.t2;g10753.t1;g10053.t1;g10053.t2;g9269.t1	K13499+K00771+K00771+K00733+K00733+K00733+K00733
Metabolism	Metabolism of cofactors and vitamins	One carbon pool by folate	7	ko00670	g1051.t1;g2821.t1;g7200.t1;g10953.t1;g10954.t1;g10165.t1;g10241.t1	K01934+K00602+K00605+K00288+K00288+K00560+K00600
Metabolism	Energy metabolism	Methane metabolism	7	ko00680	g3993.t1;g3993.t2;g5157.t1;g8435.t1;g9053.t1;g10174.t1;g10241.t1	K01689+K01689+K00850+K00121+K01895+K15633+K00600
Metabolism	Metabolism of cofactors and vitamins	Vitamin B6 metabolism	7	ko00750	g161.t1;g162.t1;g8018.t1;g6117.t1;g6117.t2;g7523.t1;g7523.t2	K08681+K06215+K01733+K00868+K00868+K01733+K01733
Metabolism	Metabolism of terpenoids and polyketides	Pinene, camphor and geraniol degradation	7	ko00907	g5029.t1;g2331.t1;g2620.t2;g2620.t3;g2620.t4;g9378.t1;g9378.t2	K00022+K00022+K11731+K11731+K11731+K01640+K01640
Metabolism	Xenobiotics biodegradation and metabolism	Drug metabolism - cytochrome P450	7	ko00982	g767.t1;g4768.t1;g3313.t1;g3313.t2;g8435.t1;g7405.t1;g7503.t1	K00699+K00485+K00699+K00699+K00121+K00799+K00485
Metabolism	Metabolism of cofactors and vitamins	Ubiquinone and other terpenoid-quinone biosynthesis	6	ko00130	g1690.t1;g2338.t1;g5723.t1;g7208.t1;g9722.t1;g10931.t1	K06125+K00457+K00457+K06126+K06127+K00815
Metabolism	Metabolism of other amino acids	Cyanoamino acid metabolism	6	ko00460	g1972.t1;g8797.t1;g9408.t1;g10241.t1;g5959.t1;g5959.t2	K18592+K18592+K00681+K00600+K18592+K18592
Metabolism	Lipid metabolism	Linoleic acid metabolism	6	ko00591	g4342.t1;g4342.t2;g7700.t1;g7700.t2;g6964.t1;g9583.t1	K01047+K01047+K01047+K01047+K01047+K07424
Metabolism	Lipid metabolism	alpha-Linolenic acid metabolism	6	ko00592	g4342.t1;g4342.t2;g7700.t1;g7700.t2;g5769.t1;g6964.t1	K01047+K01047+K01047+K01047+K00232+K01047
Metabolism	Xenobiotics biodegradation and metabolism	Metabolism of xenobiotics by cytochrome P450	6	ko00980	g767.t1;g3313.t1;g3313.t2;g8435.t1;g5784.t1;g7405.t1	K00699+K00699+K00699+K00121+K00079+K00799
Metabolism	Metabolism of other amino acids	Selenocompound metabolism	5	ko00450	g596.t1;g596.t2;g596.t3;g2790.t1;g8163.t1	K01874+K01874+K01874+K00816+K13811
Metabolism	Lipid metabolism	Steroid biosynthesis	4	ko00100	g806.t1;g3611.t1;g7068.t1;g10183.t1	K01052+K00559+K00213+K12298
Metabolism	Lipid metabolism	Primary bile acid biosynthesis	4	ko00120	g3390.t1;g3390.t2;g6869.t1;g6869.t2	K08764+K08764+K12405+K12405
Metabolism	Metabolism of other amino acids	Phosphonate and phosphinate metabolism	4	ko00440	g902.t1;g902.t2;g5796.t1;g6757.t1	K00993+K00993+K00993+K00968
Metabolism	Metabolism of other amino acids	D-Amino acid metabolism	4	ko00470	g4456.t1;g4456.t2;g4458.t1;g1472.t1	K00272+K00272+K00272+K01425
Metabolism	Glycan biosynthesis and metabolism	Glycosaminoglycan biosynthesis - keratan sulfate	4	ko00533	g4344.t1;g9394.t1;g9396.t1;g9739.t1	K00717+K00717+K00717+K07967
Metabolism	Biosynthesis of other secondary metabolites	Caffeine metabolism	3	ko00232	g3225.t1;g3225.t2;g3225.t3	K00106+K00106+K00106
Metabolism	Amino acid metabolism	Phenylalanine, tyrosine and tryptophan biosynthesis	3	ko00400	g3418.t1;g8841.t1;g10931.t1	K00500+K14454+K00815
Metabolism	Metabolism of terpenoids and polyketides	Polyketide sugar unit biosynthesis	3	ko00523	g6921.t1;g6921.t2;g6989.t1	K01710+K01710+K01790
Metabolism	Xenobiotics biodegradation and metabolism	Chloroalkane and chloroalkene degradation	3	ko00625	g5019.t1;g8435.t1;g5609.t1	K00128+K00121+K00128
Metabolism	Biosynthesis of other secondary metabolites	Indole alkaloid biosynthesis	3	ko00901	g3458.t1;g3458.t2;g3616.t1	K01593+K01593+K01593
Metabolism	Xenobiotics biodegradation and metabolism	Caprolactam degradation	3	ko00930	g5029.t1;g2331.t1;g7790.t1	K00022+K00022+K07515
Metabolism	Biosynthesis of other secondary metabolites	Betalain biosynthesis	3	ko00965	g3458.t1;g3458.t2;g3616.t1	K01593+K01593+K01593
Metabolism	Lipid metabolism	Mycolic acid biosynthesis	2	ko00074	g1164.t1;g1169.t1	K00645+K00645
Metabolism	Amino acid metabolism	Valine, leucine and isoleucine biosynthesis	2	ko00290	g10683.t1;g6099.t1	K00826+K01754
Metabolism	Biosynthesis of other secondary metabolites	Prodigiosin biosynthesis	2	ko00333	g1164.t1;g1169.t1	K00645+K00645
Metabolism	Biosynthesis of other secondary metabolites	Neomycin, kanamycin and gentamicin biosynthesis	2	ko00524	g6440.t1;g7078.t1	K00844+K00844
Metabolism	Biosynthesis of other secondary metabolites	Acarbose and validamycin biosynthesis	2	ko00525	g6921.t1;g6921.t2	K01710+K01710
Metabolism	Glycan biosynthesis and metabolism	Glycosphingolipid biosynthesis - lacto and neolacto series	2	ko00601	g6706.t1;g9739.t1	K07819+K07967
Metabolism	Xenobiotics biodegradation and metabolism	Styrene degradation	2	ko00643	g8100.t1;g6901.t1	K00451+K01555
Metabolism	Metabolism of terpenoids and polyketides	Limonene degradation	2	ko00903	g5019.t1;g5609.t1	K00128+K00128
Metabolism	Biosynthesis of other secondary metabolites	Tropane, piperidine and pyridine alkaloid biosynthesis	2	ko00960	g8841.t1;g10931.t1	K14454+K00815
Metabolism	Metabolism of terpenoids and polyketides	Insect hormone biosynthesis	2	ko00981	g5019.t1;g5609.t1	K00128+K00128
Metabolism	Metabolism of terpenoids and polyketides	Biosynthesis of vancomycin group antibiotics	2	ko01055	g6921.t1;g6921.t2	K01710+K01710
Metabolism	Biosynthesis of other secondary metabolites	Monobactam biosynthesis	1	ko00261	g8163.t1	K13811
Metabolism	Biosynthesis of other secondary metabolites	Novobiocin biosynthesis	1	ko00401	g10931.t1	K00815
Metabolism	Glycan biosynthesis and metabolism	Mannose type O-glycan biosynthesis	1	ko00515	g9739.t1	K07967
Metabolism	Glycan biosynthesis and metabolism	Glycosaminoglycan degradation	1	ko00531	g9952.t1	K12309
Metabolism	Glycan biosynthesis and metabolism	Glycosphingolipid biosynthesis - globo and isoglobo series	1	ko00603	g6133.t1	K01204
Metabolism	Glycan biosynthesis and metabolism	Glycosphingolipid biosynthesis - ganglio series	1	ko00604	g9952.t1	K12309
Metabolism	Xenobiotics biodegradation and metabolism	Naphthalene degradation	1	ko00626	g8435.t1	K00121
Metabolism	Xenobiotics biodegradation and metabolism	Aminobenzoate degradation	1	ko00627	g7790.t1	K07515
Metabolism	Metabolism of cofactors and vitamins	Biotin metabolism	1	ko00780	g5296.t1	K01942
Metabolism	Metabolism of terpenoids and polyketides	Zeatin biosynthesis	1	ko00908	g5981.t1	K00791
Metabolism	Biosynthesis of other secondary metabolites	Phenylpropanoid biosynthesis	1	ko00940	g9508.t1	K11188
Metabolism	Biosynthesis of other secondary metabolites	Glucosinolate biosynthesis	1	ko00966	g10683.t1	K00826
Metabolism	Biosynthesis of other secondary metabolites	Biosynthesis of various plant secondary metabolites	1	ko00999	g4002.t1	K00789
Metabolism	Metabolism of terpenoids and polyketides	Biosynthesis of ansamycins	1	ko01051	g2311.t1	K00615
Metabolism	Global and overview maps	Degradation of aromatic compounds	1	ko01220	g8435.t1	K00121
Organismal Systems	Environmental adaptation	Thermogenesis	117	ko04714	g4052.t1;g1889.t1;g4299.t1;g4124.t1;g4457.t1;g1609.t1;g3785.t1;g1274.t1;g230.t1;g4007.t1;g4007.t2;g4007.t3;g4007.t4;g3910.t1;g1089.t1;g1474.t1;g1474.t2;g400.t1;g2229.t1;g5275.t1;g5279.t1;g5327.t1;g5358.t1;g5359.t1;g5420.t1;g5469.t1;g5483.t1;g5483.t2;g5483.t3;g5524.t1;g5539.t1;g5540.t1;g2480.t1;g2480.t2;g2485.t1;g2732.t1;g2738.t1;g2846.t1;g2846.t2;g2900.t1;g3073.t1;g3073.t2;g3123.t1;g3130.t1;g3143…	K03960+K07200+K02133+K03946+K04345+K05692+K03934+K07188+K03942+K02136+K02136+K02136+K02136+K01897+K04364+K12461+K12461+K04373+K07199+K00416+K00235+K03951+K07198+K03955+K08765+K03952+K18164+K18164+K18164+K03959+K11650+K03955+K02128+K02128+K02128+K15109+K04426+K07376+K07376+K00418+K11648+K11648+K11647+K15109+K08766+K07376+K02130+K03966+K02140+K04345+K04345+K04345+K04688+K04688+K04688+K11416+K11416+…
Organismal Systems	Endocrine system	Oxytocin signaling pathway	94	ko04921	g1988.t1;g1889.t1;g4457.t1;g1609.t1;g1504.t1;g4022.t1;g4022.t2;g1008.t1;g885.t1;g885.t2;g885.t3;g885.t4;g661.t1;g940.t1;g940.t2;g394.t1;g2229.t1;g5358.t1;g2366.t1;g5077.t1;g5078.t1;g626.t1;g626.t2;g2556.t1;g2759.t1;g2759.t2;g2844.t1;g2874.t6;g2926.t1;g2926.t2;g2926.t3;g3057.t1;g3232.t1;g3373.t1;g3402.t1;g3412.t1;g3422.t1;g3422.t2;g3426.t1;g3426.t2;g3452.t1;g3460.t1;g3506.t1;g3630.t1;g3630.t2;g363…	K04534+K07200+K04345+K05692+K07359+K02183+K02183+K06269+K04534+K04534+K04534+K04534+K04534+K02183+K02183+K04514+K07199+K07198+K12319+K06269+K06269+K04513+K04513+K02183+K02183+K02183+K08794+K12751+K04634+K04634+K04634+K04851+K03234+K02183+K02183+K02183+K02183+K02183+K02183+K02183+K02183+K04863+K04361+K04345+K04345+K04345+K08045+K08049+K04534+K04534+K12323+K04348+K04348+K04534+K04534+K06270+K06270+…
Organismal Systems	Nervous system	Dopaminergic synapse	87	ko04728	g1988.t1;g1908.t1;g4457.t1;g1701.t1;g1776.t1;g1776.t2;g1776.t3;g4022.t1;g4022.t2;g1008.t1;g885.t1;g885.t2;g885.t3;g885.t4;g661.t1;g1460.t1;g1463.t1;g940.t1;g940.t2;g2170.t1;g2279.t1;g5556.t1;g5558.t1;g5558.t2;g5077.t1;g5078.t1;g2535.t1;g2556.t1;g2759.t1;g2759.t2;g2926.t1;g2926.t2;g2926.t3;g3057.t1;g3373.t1;g3402.t1;g3412.t1;g3422.t1;g3422.t2;g3426.t1;g3426.t2;g3452.t1;g3458.t1;g3458.t2;g3616.t1;g…	K04534+K04539+K04345+K05209+K11584+K11584+K11584+K02183+K02183+K06269+K04534+K04534+K04534+K04534+K04534+K04536+K04536+K02183+K02183+K04347+K03456+K00501+K00501+K00501+K06269+K06269+K11583+K02183+K02183+K02183+K04634+K04634+K04634+K04851+K02183+K02183+K02183+K02183+K02183+K02183+K02183+K02183+K01593+K01593+K01593+K04345+K04345+K04345+K11584+K04382+K08045+K10396+K10396+K04534+K04534+K05870+K04348+…
Organismal Systems	Endocrine system	Estrogen signaling pathway	82	ko04915	g1988.t1;g4457.t1;g1524.t1;g4022.t1;g4022.t2;g4036.t1;g4036.t2;g359.t1;g359.t2;g1089.t1;g4929.t1;g885.t1;g885.t2;g885.t3;g885.t4;g661.t1;g940.t1;g940.t2;g2247.t1;g3956.t1;g2053.t1;g1642.t1;g2491.t1;g2556.t1;g2759.t1;g2759.t2;g2926.t1;g2926.t2;g2926.t3;g3204.t1;g3373.t1;g3402.t1;g3412.t1;g3422.t1;g3422.t2;g3426.t1;g3426.t2;g3452.t1;g3506.t1;g3630.t1;g3630.t2;g3630.t3;g3661.t1;g3662.t1;g7723.t1;g88…	K04534+K04345+K03283+K02183+K02183+K06068+K06068+K04079+K04079+K04364+K01379+K04534+K04534+K04534+K04534+K04534+K02183+K02183+K08550+K04079+K01379+K03283+K04603+K02183+K02183+K02183+K04634+K04634+K04634+K04615+K02183+K02183+K02183+K02183+K02183+K02183+K02183+K02183+K04361+K04345+K04345+K04345+K00922+K00922+K01379+K01379+K08045+K03283+K03283+K08049+K04534+K04534+K05870+K04534+K04534+K04371+K01379+…
Organismal Systems	Circulatory system	Vascular smooth muscle contraction	80	ko04270	g4457.t1;g1670.t1;g4022.t1;g4022.t2;g4036.t1;g4036.t2;g1008.t1;g940.t1;g940.t2;g394.t1;g2366.t1;g4342.t1;g4342.t2;g5077.t1;g5078.t1;g626.t1;g626.t2;g2556.t1;g2759.t1;g2759.t2;g2846.t1;g2846.t2;g2874.t6;g2926.t1;g2926.t2;g2926.t3;g2939.t1;g2939.t2;g3057.t1;g3112.t1;g3138.t1;g3138.t2;g3138.t3;g3138.t4;g3230.t1;g3373.t1;g3402.t1;g3412.t1;g3422.t1;g3422.t2;g3426.t1;g3426.t2;g3452.t1;g3594.t1;g3630.t1…	K04345+K10352+K02183+K02183+K06068+K06068+K06269+K02183+K02183+K04514+K12319+K01047+K01047+K06269+K06269+K04513+K04513+K02183+K02183+K02183+K07376+K07376+K12751+K04634+K04634+K04634+K04135+K04135+K04851+K04365+K04936+K04936+K04936+K04936+K07376+K02183+K02183+K02183+K02183+K02183+K02183+K02183+K02183+K07532+K04345+K04345+K04345+K01047+K01047+K08045+K08049+K12323+K10352+K10352+K06270+K06270+K04371+…
Organismal Systems	Endocrine system	Glucagon signaling pathway	79	ko04922	g1889.t1;g4457.t1;g4022.t1;g4022.t2;g940.t1;g940.t2;g2229.t1;g4215.t1;g4711.t1;g4671.t1;g3924.t1;g5358.t1;g5420.t1;g5157.t1;g2546.t1;g2556.t1;g2759.t1;g2759.t2;g2926.t1;g2926.t2;g2926.t3;g3043.t1;g3373.t1;g3402.t1;g3412.t1;g3422.t1;g3422.t2;g3426.t1;g3426.t2;g3452.t1;g3571.t1;g3571.t2;g3571.t3;g3571.t4;g3572.t1;g3630.t1;g3630.t2;g3630.t3;g8269.t1;g8269.t2;g6387.t1;g6493.t3;g6521.t1;g6549.t1;g6549…	K07200+K04345+K02183+K02183+K02183+K02183+K07199+K04498+K07299+K07299+K15423+K07198+K08765+K00850+K00016+K02183+K02183+K02183+K04634+K04634+K04634+K00162+K02183+K02183+K02183+K02183+K02183+K02183+K02183+K02183+K16311+K16311+K16311+K16311+K00693+K04345+K04345+K04345+K07299+K07299+K11411+K05870+K07190+K04348+K04348+K07190+K07190+K07190+K07190+K02183+K06268+K06268+K00161+K04958+K04958+K04958+K05858+…
Organismal Systems	Circulatory system	Adrenergic signaling in cardiomyocytes	78	ko04261	g4457.t1;g1748.t1;g1748.t2;g1776.t1;g1776.t2;g1776.t3;g4022.t1;g4022.t2;g1008.t1;g4628.t1;g940.t1;g940.t2;g735.t1;g2279.t1;g5077.t1;g5078.t1;g1149.t1;g2535.t1;g2556.t1;g2759.t1;g2759.t2;g2773.t1;g2926.t1;g2926.t2;g2926.t3;g2939.t1;g2939.t2;g3057.t1;g3238.t1;g3373.t1;g3402.t1;g3412.t1;g3422.t1;g3422.t2;g3426.t1;g3426.t2;g3452.t1;g3460.t1;g3630.t1;g3630.t2;g3630.t3;g8498.t1;g8193.t1;g9017.t1;g5812.…	K04345+K05849+K05849+K11584+K11584+K11584+K02183+K02183+K06269+K10373+K02183+K02183+K01539+K03456+K06269+K06269+K01539+K11583+K02183+K02183+K02183+K01539+K04634+K04634+K04634+K04135+K04135+K04851+K05850+K02183+K02183+K02183+K02183+K02183+K02183+K02183+K02183+K04863+K04345+K04345+K04345+K11584+K04382+K08045+K05853+K08049+K04445+K04445+K04445+K05870+K01540+K04371+K02183+K06269+K11584+K12045+K12045+…
Organismal Systems	Development and regeneration	Axon regeneration	77	ko04361	g1988.t1;g4457.t1;g1369.t1;g4036.t1;g4036.t2;g885.t1;g885.t2;g885.t3;g885.t4;g661.t1;g392.t1;g4951.t1;g2033.t1;g2033.t2;g5358.t1;g5511.t1;g2342.t1;g2426.t1;g2427.t2;g2435.t1;g626.t1;g626.t2;g2926.t1;g2926.t2;g2926.t3;g3007.t1;g3007.t3;g3057.t1;g3458.t1;g3458.t2;g3556.t1;g3557.t1;g3594.t1;g3616.t1;g3630.t1;g3630.t2;g3630.t3;g3661.t1;g3662.t1;g3683.t1;g3683.t2;g3683.t4;g8161.t1;g7835.t2;g5839.t1;g6…	K04534+K04345+K04392+K06068+K06068+K04534+K04534+K04534+K04534+K04534+K06704+K04392+K00502+K00502+K07198+K04459+K19862+K09408+K09408+K00901+K04513+K04513+K04634+K04634+K04634+K04459+K04459+K04851+K01593+K01593+K09442+K09442+K07532+K01593+K04345+K04345+K04345+K00922+K00922+K04688+K04688+K04688+K12494+K11593+K08049+K04534+K04534+K04443+K04443+K04443+K04534+K04534+K06843+K00901+K00901+K05099+K00901+…
Organismal Systems	Endocrine system	Insulin signaling pathway	76	ko04910	g1889.t1;g4457.t1;g1274.t1;g4022.t1;g4022.t2;g1008.t1;g1089.t1;g933.t1;g940.t1;g940.t2;g2077.t1;g2229.t1;g5358.t1;g5077.t1;g5078.t1;g2556.t1;g2735.t1;g2735.t2;g2759.t1;g2759.t2;g3112.t1;g3373.t1;g3402.t1;g3412.t1;g3422.t1;g3422.t2;g3426.t1;g3426.t2;g3452.t1;g3572.t1;g3630.t1;g3630.t2;g3630.t3;g3661.t1;g3662.t1;g3683.t1;g3683.t2;g3683.t4;g8202.t1;g8206.t1;g9135.t1;g9154.t1;g9154.t2;g6440.t1;g6495.…	K07200+K04345+K07188+K02183+K02183+K06269+K04364+K03259+K02183+K02183+K07189+K07199+K07198+K06269+K06269+K02183+K03259+K03259+K02183+K02183+K04365+K02183+K02183+K02183+K02183+K02183+K02183+K02183+K02183+K00693+K04345+K04345+K04345+K00922+K00922+K04688+K04688+K04688+K16172+K07204+K04707+K06276+K06276+K00844+K05695+K07190+K04372+K04372+K02991+K00665+K07190+K07190+K07190+K07190+K04371+K00844+K02183+…
Organismal Systems	Nervous system	Retrograde endocannabinoid signaling	75	ko04723	g1988.t1;g4052.t1;g1908.t1;g4124.t1;g4457.t1;g3785.t1;g3803.t2;g230.t1;g375.t1;g376.t1;g885.t1;g885.t2;g885.t3;g885.t4;g661.t1;g1460.t1;g1463.t1;g2170.t1;g5327.t1;g5359.t1;g5469.t1;g5524.t1;g5540.t1;g2491.t1;g2926.t1;g2926.t2;g2926.t3;g3057.t1;g3529.t1;g3630.t1;g3630.t2;g3630.t3;g9017.t1;g9074.t3;g5702.t1;g5839.t1;g6247.t1;g6247.t2;g6355.t1;g6461.t1;g6461.t2;g6545.t1;g5601.t1;g8866.t1;g7781.t1;g6…	K04534+K03960+K04539+K03946+K04345+K03934+K12302+K03942+K13806+K13806+K04534+K04534+K04534+K04534+K04534+K04536+K04536+K04347+K03951+K03955+K03952+K03959+K03955+K04603+K04634+K04634+K04634+K04851+K03966+K04345+K04345+K04345+K08045+K03950+K03968+K08049+K04534+K04534+K03936+K11352+K11352+K03962+K04534+K04534+K03965+K04849+K03943+K03953+K04371+K03935+K04958+K04958+K04958+K05858+K05858+K04441+K03963+…
Organismal Systems	Environmental adaptation	Circadian entrainment	74	ko04713	g1988.t1;g1908.t1;g4457.t1;g1701.t1;g4022.t1;g4022.t2;g885.t1;g885.t2;g885.t3;g885.t4;g661.t1;g1460.t1;g1463.t1;g940.t1;g940.t2;g2170.t1;g2366.t1;g2556.t1;g2759.t1;g2759.t2;g2846.t1;g2846.t2;g2926.t1;g2926.t2;g2926.t3;g3057.t1;g3230.t1;g3373.t1;g3402.t1;g3412.t1;g3422.t1;g3422.t2;g3426.t1;g3426.t2;g3452.t1;g3630.t1;g3630.t2;g3630.t3;g9017.t1;g5839.t1;g6247.t1;g6247.t2;g6320.t1;g6320.t2;g6320.t3;g…	K04534+K04539+K04345+K05209+K02183+K02183+K04534+K04534+K04534+K04534+K04534+K04536+K04536+K02183+K02183+K04347+K12319+K02183+K02183+K02183+K07376+K07376+K04634+K04634+K04634+K04851+K07376+K02183+K02183+K02183+K02183+K02183+K02183+K02183+K02183+K04345+K04345+K04345+K08045+K08049+K04534+K04534+K04445+K04445+K04445+K05870+K04534+K04534+K04371+K04854+K02183+K04958+K04958+K04958+K12319+K05858+K05858+…
Organismal Systems	Endocrine system	Melanogenesis	68	ko04916	g1988.t1;g4457.t1;g4022.t1;g4022.t2;g885.t1;g885.t2;g885.t3;g885.t4;g661.t1;g940.t1;g940.t2;g4215.t1;g2354.t1;g5069.t1;g2556.t1;g2759.t1;g2759.t2;g2926.t1;g2926.t2;g2926.t3;g3373.t1;g3402.t1;g3412.t1;g3422.t1;g3422.t2;g3426.t1;g3426.t2;g3452.t1;g3630.t1;g3630.t2;g3630.t3;g3739.t1;g3739.t2;g3739.t3;g3746.t1;g8181.t1;g8181.t2;g8986.t1;g9017.t1;g5839.t1;g5899.t1;g6247.t1;g6247.t2;g6348.t1;g6493.t3;g…	K04534+K04345+K02183+K02183+K04534+K04534+K04534+K04534+K04534+K02183+K02183+K04498+K00408+K00505+K02183+K02183+K02183+K04634+K04634+K04634+K02183+K02183+K02183+K02183+K02183+K02183+K02183+K02183+K04345+K04345+K04345+K02353+K02353+K02353+K02353+K00408+K00408+K04491+K08045+K08049+K00505+K04534+K04534+K01384+K05870+K00444+K04534+K04534+K04371+K02183+K05858+K05858+K02183+K02183+K02432+K02183+K02105+…
Organismal Systems	Nervous system	Synaptic vesicle cycle	67	ko04721	g4986.t1;g4986.t2;g3803.t2;g1065.t1;g1065.t2;g1065.t3;g473.t1;g4170.t1;g4171.t1;g4524.t1;g2506.t1;g2684.t1;g2684.t2;g2750.t1;g2883.t1;g3171.t1;g3171.t2;g3396.t1;g3396.t2;g3396.t3;g3543.t1;g7690.t1;g8182.t1;g8182.t2;g5726.t1;g5840.t1;g5881.t1;g8005.t1;g8005.t2;g6213.t1;g6327.t1;g6474.t1;g6474.t2;g6520.t1;g6552.t1;g9499.t1;g9499.t2;g7803.t1;g6570.t1;g6585.t1;g6628.t1;g6668.t1;g6668.t2;g6668.t3;g692…	K02144+K02144+K12302+K11826+K11826+K11826+K15290+K05613+K05613+K15292+K04560+K02152+K02152+K15290+K05613+K05034+K05034+K02154+K02154+K02154+K02147+K01528+K05613+K05613+K04646+K11825+K15293+K11824+K11824+K02146+K05037+K02148+K02148+K02150+K02154+K15290+K15290+K06027+K04849+K15294+K01528+K01528+K01528+K01528+K01528+K03661+K03661+K05038+K05613+K15296+K04560+K04560+K04560+K02155+K15015+K15015+K02145+…
Organismal Systems	Nervous system	Glutamatergic synapse	67	ko04724	g1988.t1;g1888.t1;g1908.t1;g4457.t1;g3803.t2;g1701.t1;g885.t1;g885.t2;g885.t3;g885.t4;g4170.t1;g4171.t1;g661.t1;g1460.t1;g1463.t1;g1472.t1;g427.t1;g2170.t1;g5428.t1;g2491.t1;g2883.t1;g2926.t1;g2926.t2;g2926.t3;g3057.t1;g3630.t1;g3630.t2;g3630.t3;g8182.t1;g8182.t2;g9017.t1;g5839.t1;g6187.t1;g6247.t1;g6247.t2;g6506.t1;g6549.t1;g6549.t2;g5601.t1;g8866.t1;g6865.t1;g7212.t1;g7212.t2;g7429.t1;g7431.t1;…	K04534+K01915+K04539+K04345+K12302+K05209+K04534+K04534+K04534+K04534+K05613+K05613+K04534+K04536+K04536+K01425+K01115+K04347+K15009+K04603+K05613+K04634+K04634+K04634+K04851+K04345+K04345+K04345+K05613+K05613+K08045+K08049+K05202+K04534+K04534+K04605+K04348+K04348+K04534+K04534+K04371+K06268+K06268+K04958+K04958+K04958+K05858+K05858+K05613+K06268+K06268+K11828+K04534+K02677+K02677+K04605+K04605+…
Organismal Systems	Development and regeneration	Axon guidance	66	ko04360	g4092.t1;g4295.t1;g1369.t1;g4012.t1;g4012.t2;g1020.t1;g927.t1;g394.t1;g4951.t1;g5341.t1;g5482.t1;g5513.t1;g2342.t1;g2354.t1;g2394.t1;g5151.t1;g1147.t1;g626.t1;g626.t2;g2601.t1;g2601.t2;g2817.t1;g2817.t2;g2858.t1;g2910.t1;g3114.t1;g3582.t1;g3594.t1;g3661.t1;g3662.t1;g8181.t1;g8181.t2;g9154.t1;g9154.t2;g6540.t1;g6549.t1;g6549.t2;g6551.t1;g5619.t1;g9478.t1;g9478.t2;g6809.t1;g6865.t1;g6894.t1;g7198.t…	K13578+K05765+K04392+K05463+K05463+K06093+K05128+K04514+K04392+K05719+K06225+K06225+K19862+K00408+K01116+K06619+K04409+K04513+K04513+K05765+K05765+K06820+K06820+K07521+K06820+K07526+K07520+K07532+K00922+K00922+K00408+K00408+K06276+K06276+K00444+K04348+K04348+K04409+K06272+K04393+K04393+K06843+K04371+K05099+K04409+K06268+K06268+K07293+K06268+K06268+K06839+K06839+K02677+K02677+K06753+K06753+K02090+…
Organismal Systems	Endocrine system	Thyroid hormone signaling pathway	63	ko04919	g4457.t1;g1609.t1;g1084.t1;g1084.t2;g735.t1;g414.t1;g2247.t1;g4215.t1;g4711.t1;g4671.t1;g2352.t1;g2352.t2;g2354.t1;g2394.t1;g5157.t1;g1149.t1;g2773.t1;g3156.t1;g3156.t2;g3630.t1;g3630.t2;g3630.t3;g3661.t1;g3662.t1;g8181.t1;g8181.t2;g9154.t1;g9154.t2;g9159.t1;g5812.t1;g8269.t1;g8269.t2;g9416.t1;g9417.t1;g6594.t1;g6865.t1;g6959.t1;g7469.t1;g7489.t1;g7490.t1;g7490.t2;g9758.t1;g9758.t2;g9781.t1;g1060…	K04345+K05692+K06067+K06067+K01539+K19029+K08550+K04498+K07299+K07299+K08524+K08524+K00408+K01116+K00850+K01539+K01539+K05857+K05857+K04345+K04345+K04345+K00922+K00922+K00408+K00408+K06276+K06276+K15156+K05853+K07299+K07299+K06062+K06062+K01540+K04371+K05692+K05692+K09183+K05858+K05858+K11644+K11644+K05692+K05860+K05860+K02105+K07203+K02677+K02677+K01539+K04456+K06067+K05704+K05858+K05858+K05858+…
Organismal Systems	Nervous system	Neurotrophin signaling pathway	62	ko04722	g1369.t1;g4022.t1;g4022.t2;g4036.t1;g4036.t2;g1089.t1;g1457.t1;g1457.t2;g1474.t1;g1474.t2;g940.t1;g940.t2;g400.t1;g4951.t1;g2394.t1;g2426.t1;g2427.t2;g5151.t1;g626.t1;g626.t2;g2556.t1;g2738.t1;g2759.t1;g2759.t2;g3112.t1;g3373.t1;g3402.t1;g3412.t1;g3422.t1;g3422.t2;g3426.t1;g3426.t2;g3452.t1;g3661.t1;g3662.t1;g8202.t1;g9154.t1;g9154.t2;g5710.t1;g6283.t1;g6283.t2;g6283.t3;g6320.t1;g6320.t2;g6320.t3…	K04392+K02183+K02183+K06068+K06068+K04364+K04353+K04353+K12461+K12461+K02183+K02183+K04373+K04392+K01116+K09408+K09408+K06619+K04513+K04513+K02183+K04426+K02183+K02183+K04365+K02183+K02183+K02183+K02183+K02183+K02183+K02183+K02183+K00922+K00922+K16172+K06276+K06276+K12460+K04443+K04443+K04443+K04445+K04445+K04445+K04393+K04393+K04371+K02183+K04734+K07293+K02183+K02183+K04441+K02183+K12462+K04456+…
Organismal Systems	Endocrine system	Aldosterone synthesis and secretion	62	ko04925	g4457.t1;g1274.t1;g4022.t1;g4022.t2;g375.t1;g376.t1;g940.t1;g940.t2;g735.t1;g4806.t1;g1149.t1;g2556.t1;g2759.t1;g2759.t2;g2773.t1;g2844.t1;g2926.t1;g2926.t2;g2926.t3;g3057.t1;g3238.t1;g3373.t1;g3402.t1;g3412.t1;g3422.t1;g3422.t2;g3426.t1;g3426.t2;g3452.t1;g3630.t1;g3630.t2;g3630.t3;g9017.t1;g9177.t1;g5839.t1;g5850.t1;g6279.t1;g6493.t3;g6594.t1;g6871.t1;g7107.t1;g7284.t1;g7351.t1;g7429.t1;g7431.t1…	K04345+K07188+K02183+K02183+K13806+K13806+K02183+K02183+K01539+K00513+K01539+K02183+K02183+K02183+K01539+K08794+K04634+K04634+K04634+K04851+K05850+K02183+K02183+K02183+K02183+K02183+K02183+K02183+K02183+K04345+K04345+K04345+K08045+K04914+K08049+K04465+K12323+K05870+K01540+K04854+K02183+K18050+K06070+K04958+K04958+K04958+K05858+K05858+K02183+K02183+K02183+K07188+K06070+K02677+K02677+K01539+K04632+…
Organismal Systems	Endocrine system	GnRH signaling pathway	61	ko04912	g4457.t1;g4022.t1;g4022.t2;g4036.t1;g4036.t2;g1089.t1;g940.t1;g940.t2;g427.t1;g2194.t1;g2556.t1;g2759.t1;g2759.t2;g2926.t1;g2926.t2;g2926.t3;g3057.t1;g3373.t1;g3402.t1;g3412.t1;g3422.t1;g3422.t2;g3426.t1;g3426.t2;g3452.t1;g3506.t1;g3630.t1;g3630.t2;g3630.t3;g9017.t1;g5839.t1;g9478.t1;g9478.t2;g6865.t1;g7107.t1;g7429.t1;g7431.t1;g7431.t2;g7433.t1;g7490.t1;g7490.t2;g9621.t1;g9632.t1;g9788.t1;g10530…	K04345+K02183+K02183+K06068+K06068+K04364+K02183+K02183+K01115+K07763+K02183+K02183+K02183+K04634+K04634+K04634+K04851+K02183+K02183+K02183+K02183+K02183+K02183+K02183+K02183+K04361+K04345+K04345+K04345+K08045+K08049+K04393+K04393+K04371+K02183+K04958+K04958+K04958+K04430+K05858+K05858+K02183+K02183+K04441+K02183+K02677+K02677+K04432+K04432+K04632+K04632+K05704+K07763+K07763+K03099+K05858+K05858+…
Organismal Systems	Digestive system	Salivary secretion	61	ko04970	g4457.t1;g4022.t1;g4022.t2;g940.t1;g940.t2;g735.t1;g2366.t1;g1149.t1;g2556.t1;g2759.t1;g2759.t2;g2773.t1;g2846.t1;g2846.t2;g2926.t1;g2926.t2;g2926.t3;g2939.t1;g2939.t2;g3138.t1;g3138.t2;g3138.t3;g3138.t4;g3230.t1;g3238.t1;g3373.t1;g3402.t1;g3412.t1;g3422.t1;g3422.t2;g3426.t1;g3426.t2;g3452.t1;g3630.t1;g3630.t2;g3630.t3;g8164.t1;g8164.t2;g9017.t1;g5839.t1;g6594.t1;g7107.t1;g7429.t1;g7431.t1;g7431.…	K04345+K02183+K02183+K02183+K02183+K01539+K12319+K01539+K02183+K02183+K02183+K01539+K07376+K07376+K04634+K04634+K04634+K04135+K04135+K04936+K04936+K04936+K04936+K07376+K05850+K02183+K02183+K02183+K02183+K02183+K02183+K02183+K02183+K04345+K04345+K04345+K13911+K13911+K08045+K08049+K01540+K02183+K04958+K04958+K04958+K12319+K05858+K05858+K02183+K02183+K02183+K02677+K02677+K01539+K04632+K04632+K05858+…
Organismal Systems	Endocrine system	Renin secretion	60	ko04924	g4457.t1;g4022.t1;g4022.t2;g940.t1;g940.t2;g2216.t1;g3776.t1;g2366.t1;g2407.t1;g2556.t1;g2759.t1;g2759.t2;g2926.t1;g2926.t2;g2926.t3;g3057.t1;g3138.t1;g3138.t2;g3138.t3;g3138.t4;g3373.t1;g3402.t1;g3412.t1;g3422.t1;g3422.t2;g3426.t1;g3426.t2;g3452.t1;g3630.t1;g3630.t2;g3630.t3;g8535.t1;g9017.t1;g9092.t1;g6279.t1;g6493.t3;g6549.t1;g6549.t2;g6702.t1;g7107.t1;g7212.t1;g7212.t2;g7429.t1;g7431.t1;g7431…	K04345+K02183+K02183+K02183+K02183+K01363+K01363+K12319+K19021+K02183+K02183+K02183+K04634+K04634+K04634+K04851+K04936+K04936+K04936+K04936+K02183+K02183+K02183+K02183+K02183+K02183+K02183+K02183+K04345+K04345+K04345+K01363+K08045+K01363+K12323+K05870+K04348+K04348+K01363+K02183+K06268+K06268+K04958+K04958+K04958+K01363+K12319+K05858+K05858+K02183+K02183+K06268+K06268+K02183+K04632+K04632+K01363+…
Organismal Systems	Immune system	Neutrophil extracellular trap formation	59	ko04613	g2004.t1;g4960.t1;g5021.t1;g1602.t1;g1609.t1;g1611.t1;g1286.t1;g1369.t1;g363.t1;g364.t1;g1084.t1;g1084.t2;g525.t1;g1469.t1;g4951.t1;g2092.t1;g2092.t2;g143.t1;g5472.t1;g2394.t1;g5074.t1;g2466.t1;g2467.t1;g2484.t1;g2901.t1;g3157.t1;g3317.t1;g3661.t1;g3662.t1;g8651.t1;g8652.t1;g8664.t1;g9238.t1;g6262.t1;g5593.t1;g5593.t2;g6865.t1;g6959.t1;g7010.t1;g7170.t1;g7375.t1;g7404.t1;g7469.t1;g7490.t1;g7490.t…	K11253+K10802+K11253+K11251+K05692+K11251+K11253+K04392+K11251+K11253+K06067+K06067+K11253+K05863+K04392+K11253+K11253+K11253+K11407+K01116+K11253+K11253+K11251+K11251+K08337+K15040+K11253+K00922+K00922+K11253+K11251+K11253+K11253+K04427+K05012+K05012+K04371+K05692+K11254+K11418+K11253+K11406+K05692+K05858+K05858+K05692+K04441+K11251+K07203+K02677+K02677+K04456+K06067+K05704+K05858+K05858+K05858+…
Organismal Systems	Nervous system	Long-term potentiation	59	ko04720	g4457.t1;g1701.t1;g4022.t1;g4022.t2;g1008.t1;g1457.t1;g1457.t2;g940.t1;g940.t2;g400.t1;g4215.t1;g5077.t1;g5078.t1;g2491.t1;g2556.t1;g2759.t1;g2759.t2;g2926.t1;g2926.t2;g2926.t3;g3112.t1;g3373.t1;g3402.t1;g3412.t1;g3422.t1;g3422.t2;g3426.t1;g3426.t2;g3452.t1;g3630.t1;g3630.t2;g3630.t3;g6549.t1;g6549.t2;g6865.t1;g7107.t1;g7155.t1;g7212.t1;g7212.t2;g7429.t1;g7431.t1;g7431.t2;g7490.t1;g7490.t2;g9621.…	K04345+K05209+K02183+K02183+K06269+K04353+K04353+K02183+K02183+K04373+K04498+K06269+K06269+K04603+K02183+K02183+K02183+K04634+K04634+K04634+K04365+K02183+K02183+K02183+K02183+K02183+K02183+K02183+K02183+K04345+K04345+K04345+K04348+K04348+K04371+K02183+K06269+K06268+K06268+K04958+K04958+K04958+K05858+K05858+K02183+K02183+K06268+K06268+K02183+K02677+K02677+K05208+K05208+K05208+K05858+K05858+K05858+…
Organismal Systems	Immune system	Platelet activation	56	ko04611	g4457.t1;g1609.t1;g1008.t1;g1457.t1;g1457.t2;g394.t1;g5341.t1;g2366.t1;g5077.t1;g5078.t1;g5131.t1;g5166.t1;g626.t1;g626.t2;g2846.t1;g2846.t2;g2926.t1;g2926.t2;g2926.t3;g3230.t1;g3509.t1;g3510.t1;g3538.t1;g3594.t1;g3630.t1;g3630.t2;g3630.t3;g3661.t1;g3662.t1;g9017.t1;g5839.t1;g7998.t1;g7998.t2;g6865.t1;g6876.t1;g6959.t1;g7155.t1;g7429.t1;g7431.t1;g7431.t2;g7460.t1;g7469.t1;g7490.t1;g7490.t2;g9781.…	K04345+K05692+K06269+K04353+K04353+K04514+K05719+K12319+K06269+K06269+K16059+K16059+K04513+K04513+K07376+K07376+K04634+K04634+K04634+K07376+K06271+K06271+K06271+K07532+K04345+K04345+K04345+K00922+K00922+K08045+K08049+K06270+K06270+K04371+K17704+K05692+K06269+K04958+K04958+K04958+K12319+K05692+K05858+K05858+K05692+K04441+K04456+K00907+K04632+K04632+K05704+K05858+K05858+K05858+K08042+K04456
Organismal Systems	Immune system	C-type lectin receptor signaling pathway	55	ko04625	g4022.t1;g4022.t2;g4036.t1;g4036.t2;g940.t1;g940.t2;g4392.t1;g1147.t1;g626.t1;g626.t2;g2556.t1;g2759.t1;g2759.t2;g3373.t1;g3402.t1;g3412.t1;g3422.t1;g3422.t2;g3426.t1;g3426.t2;g3452.t1;g3594.t1;g3661.t1;g3662.t1;g6283.t1;g6283.t2;g6283.t3;g6549.t1;g6549.t2;g6551.t1;g6556.t1;g6556.t2;g9405.t1;g6865.t1;g7107.t1;g7162.t1;g7198.t1;g7212.t1;g7212.t2;g7243.t1;g7429.t1;g7431.t1;g7431.t2;g9621.t1;g9632.t…	K02183+K02183+K06068+K06068+K02183+K02183+K07830+K04409+K04513+K04513+K02183+K02183+K02183+K02183+K02183+K02183+K02183+K02183+K02183+K02183+K02183+K07532+K00922+K00922+K04443+K04443+K04443+K04348+K04348+K04409+K14958+K14958+K07369+K04371+K02183+K04734+K04409+K06268+K06268+K07293+K04958+K04958+K04958+K02183+K02183+K06268+K06268+K04441+K02183+K04456+K05704+K07827+K07827+K07831+K04456
Organismal Systems	Sensory system	Inflammatory mediator regulation of TRP channels	55	ko04750	g4457.t1;g4022.t1;g4022.t2;g4036.t1;g4036.t2;g1008.t1;g940.t1;g940.t2;g2394.t1;g5077.t1;g5078.t1;g2556.t1;g2759.t1;g2759.t2;g2926.t1;g2926.t2;g2926.t3;g3373.t1;g3402.t1;g3412.t1;g3422.t1;g3422.t2;g3426.t1;g3426.t2;g3452.t1;g3630.t1;g3630.t2;g3630.t3;g3661.t1;g3662.t1;g9017.t1;g5839.t1;g7107.t1;g7155.t1;g7284.t1;g7429.t1;g7431.t1;g7431.t2;g7490.t1;g7490.t2;g9621.t1;g9632.t1;g9788.t1;g10530.t1;g109…	K04345+K02183+K02183+K06068+K06068+K06269+K02183+K02183+K01116+K06269+K06269+K02183+K02183+K02183+K04634+K04634+K04634+K02183+K02183+K02183+K02183+K02183+K02183+K02183+K02183+K04345+K04345+K04345+K00922+K00922+K08045+K08049+K02183+K06269+K18050+K04958+K04958+K04958+K05858+K05858+K02183+K02183+K04441+K02183+K02677+K02677+K04432+K04432+K04632+K04632+K05704+K05858+K05858+K05858+K08042
Organismal Systems	Nervous system	Serotonergic synapse	54	ko04726	g1988.t1;g1908.t1;g4457.t1;g885.t1;g885.t2;g885.t3;g885.t4;g661.t1;g1460.t1;g1463.t1;g2170.t1;g2033.t1;g2033.t2;g2926.t1;g2926.t2;g2926.t3;g3057.t1;g3079.t1;g3112.t1;g3458.t1;g3458.t2;g3479.t1;g3616.t1;g3630.t1;g3630.t2;g3630.t3;g9017.t1;g5763.t1;g6247.t1;g6247.t2;g6327.t1;g6395.t1;g5601.t1;g8866.t1;g6570.t1;g6865.t1;g7429.t1;g7431.t1;g7431.t2;g7490.t1;g7490.t2;g10660.t1;g10825.t1;g10908.t1;g1090…	K04534+K04539+K04345+K04534+K04534+K04534+K04534+K04534+K04536+K04536+K04347+K00502+K00502+K04634+K04634+K04634+K04851+K04153+K04365+K01593+K01593+K04892+K01593+K04345+K04345+K04345+K08045+K04153+K04534+K04534+K05037+K04943+K04534+K04534+K04849+K04371+K04958+K04958+K04958+K05858+K05858+K04163+K04534+K02677+K02677+K04520+K04632+K04632+K05858+K05858+K05858+K07827+K07827+K05181
Organismal Systems	Immune system	Chemokine signaling pathway	53	ko04062	g1908.t1;g4457.t1;g1369.t1;g4036.t1;g4036.t2;g1089.t1;g1457.t1;g1457.t2;g1460.t1;g1463.t1;g941.t1;g394.t1;g4951.t1;g2170.t1;g2394.t1;g2426.t1;g2427.t2;g1147.t1;g626.t1;g626.t2;g2926.t1;g2926.t2;g2926.t3;g3112.t1;g3630.t1;g3630.t2;g3630.t3;g3661.t1;g3662.t1;g9017.t1;g5839.t1;g6551.t1;g9478.t1;g9478.t2;g6865.t1;g6912.t1;g7162.t1;g7198.t1;g7490.t1;g7490.t2;g10936.t1;g10936.t2;g10976.t1;g10157.t1;g10…	K04539+K04345+K04392+K06068+K06068+K04364+K04353+K04353+K04536+K04536+K12367+K04514+K04392+K04347+K01116+K09408+K09408+K04409+K04513+K04513+K04634+K04634+K04634+K04365+K04345+K04345+K04345+K00922+K00922+K08045+K08049+K04409+K04393+K04393+K04371+K04439+K04734+K04409+K05858+K05858+K08291+K08291+K04456+K05704+K03099+K05858+K05858+K05858+K07827+K07827+K08042+K04392+K04456
Organismal Systems	Digestive system	Gastric acid secretion	53	ko04971	g4457.t1;g1609.t1;g4022.t1;g4022.t2;g940.t1;g940.t2;g735.t1;g1149.t1;g2556.t1;g2759.t1;g2759.t2;g2773.t1;g2926.t1;g2926.t2;g2926.t3;g3373.t1;g3402.t1;g3412.t1;g3422.t1;g3422.t2;g3426.t1;g3426.t2;g3452.t1;g3630.t1;g3630.t2;g3630.t3;g9017.t1;g5839.t1;g6594.t1;g6926.t1;g6926.t2;g6959.t1;g7107.t1;g7429.t1;g7431.t1;g7431.t2;g7469.t1;g7490.t1;g7490.t2;g9621.t1;g9632.t1;g9781.t1;g10530.t1;g10908.t1;g109…	K04345+K05692+K02183+K02183+K02183+K02183+K01539+K01539+K02183+K02183+K02183+K01539+K04634+K04634+K04634+K02183+K02183+K02183+K02183+K02183+K02183+K02183+K02183+K04345+K04345+K04345+K08045+K08049+K01540+K04218+K04218+K05692+K02183+K04958+K04958+K04958+K05692+K05858+K05858+K02183+K02183+K05692+K02183+K02677+K02677+K01539+K00907+K04632+K04632+K05858+K05858+K05858+K08042
Organismal Systems	Nervous system	Cholinergic synapse	52	ko04725	g1988.t1;g1908.t1;g4457.t1;g3997.t1;g885.t1;g885.t2;g885.t3;g885.t4;g661.t1;g1460.t1;g1463.t1;g2170.t1;g2039.t1;g2926.t1;g2926.t2;g2926.t3;g3057.t1;g3630.t1;g3630.t2;g3630.t3;g3661.t1;g3662.t1;g3750.t1;g9017.t1;g9147.t1;g9147.t2;g5839.t1;g6247.t1;g6247.t2;g6493.t3;g5601.t1;g9377.t1;g8866.t1;g6570.t1;g6865.t1;g7429.t1;g7431.t1;g7431.t2;g7490.t1;g7490.t2;g10825.t1;g10908.t1;g10908.t2;g10976.t1;g103…	K04534+K04539+K04345+K14387+K04534+K04534+K04534+K04534+K04534+K04536+K04536+K04347+K04930+K04634+K04634+K04634+K04851+K04345+K04345+K04345+K00922+K00922+K01049+K08045+K01049+K01049+K08049+K04534+K04534+K05870+K04534+K01049+K04534+K04849+K04371+K04958+K04958+K04958+K05858+K05858+K04534+K02677+K02677+K04456+K05858+K05858+K05858+K07827+K07827+K08042+K01049+K04456
Organismal Systems	Endocrine system	Progesterone-mediated oocyte maturation	52	ko04914	g4076.t1;g4076.t3;g4293.t1;g4457.t1;g1613.t1;g1502.t1;g359.t1;g359.t2;g90.t1;g400.t1;g3956.t1;g258.t1;g258.t2;g2447.t1;g2569.t1;g2601.t3;g3081.t1;g3112.t1;g3181.t1;g3181.t2;g3524.t1;g3630.t1;g3630.t2;g3630.t3;g3661.t1;g3662.t1;g9017.t1;g9084.t1;g9084.t2;g5720.t1;g5839.t1;g9253.t1;g6186.t1;g9346.t1;g9438.t1;g8855.t1;g6593.t2;g6865.t1;g7389.t1;g7426.t1;g7426.t2;g9788.t1;g10976.t1;g10136.t1;g10296.t…	K06633+K06633+K05866+K04345+K02087+K06633+K04079+K04079+K06633+K04373+K04079+K06631+K06631+K03364+K02602+K03357+K02537+K04365+K03358+K03358+K03351+K04345+K04345+K04345+K00922+K00922+K08045+K06627+K21771+K05866+K08049+K02602+K03350+K11481+K21771+K03364+K03355+K04371+K02087+K02087+K02087+K04441+K04456+K06631+K03349+K03349+K07827+K07827+K02178+K08042+K02602+K04456
Organismal Systems	Endocrine system	Relaxin signaling pathway	50	ko04926	g1988.t1;g1908.t1;g4457.t1;g1089.t1;g885.t1;g885.t2;g885.t3;g885.t4;g661.t1;g1460.t1;g1463.t1;g2170.t1;g3173.t1;g3506.t1;g3630.t1;g3630.t2;g3630.t3;g3661.t1;g3662.t1;g9017.t1;g9172.t1;g5839.t1;g6247.t1;g6247.t2;g6493.t3;g5601.t1;g8866.t1;g6865.t1;g6912.t1;g7162.t1;g7302.t1;g7433.t1;g7490.t1;g7490.t2;g9788.t1;g10825.t1;g10908.t1;g10908.t2;g10976.t1;g10056.t1;g10056.t2;g10157.t1;g10248.t1;g10341.t1…	K04534+K04539+K04345+K04364+K04534+K04534+K04534+K04534+K04534+K04536+K04536+K04347+K04674+K04361+K04345+K04345+K04345+K00922+K00922+K08045+K04500+K08049+K04534+K04534+K05870+K04534+K04534+K04371+K04439+K04734+K04500+K04430+K05858+K05858+K04441+K04534+K02677+K02677+K04456+K04632+K04632+K05704+K03099+K05858+K05858+K05858+K07827+K07827+K08042+K04456
Organismal Systems	Digestive system	Pancreatic secretion	45	ko04972	g1369.t1;g244.t1;g1457.t1;g1457.t2;g735.t1;g4951.t1;g4342.t1;g4342.t2;g1149.t1;g626.t1;g626.t2;g2773.t1;g2926.t1;g2926.t2;g2926.t3;g3138.t1;g3138.t2;g3138.t3;g3138.t4;g3238.t1;g3513.t1;g7700.t1;g7700.t2;g9017.t1;g5812.t1;g5839.t1;g6594.t1;g6964.t1;g7429.t1;g7431.t1;g7431.t2;g7490.t1;g7490.t2;g10908.t1;g10908.t2;g10962.t1;g10056.t1;g10056.t2;g10183.t1;g10293.t2;g10341.t1;g10341.t2;g10341.t3;g10465…	K04392+K01298+K04353+K04353+K01539+K04392+K01047+K01047+K01539+K04513+K04513+K01539+K04634+K04634+K04634+K04936+K04936+K04936+K04936+K05850+K07904+K01047+K01047+K08045+K05853+K08049+K01540+K01047+K04958+K04958+K04958+K05858+K05858+K02677+K02677+K01539+K04632+K04632+K12298+K04962+K05858+K05858+K05858+K08042+K04392
Organismal Systems	Endocrine system	Parathyroid hormone synthesis, secretion and action	44	ko04928	g4457.t1;g427.t1;g2194.t1;g5512.t1;g2352.t1;g2352.t2;g626.t1;g626.t2;g2926.t1;g2926.t2;g2926.t3;g3112.t1;g3506.t1;g3542.t1;g3630.t1;g3630.t2;g3630.t3;g9017.t1;g5839.t1;g6218.t1;g6218.t2;g6493.t3;g6865.t1;g6912.t1;g7192.t1;g7429.t1;g7431.t1;g7431.t2;g7490.t1;g7490.t2;g10908.t1;g10908.t2;g10910.t1;g10048.t1;g10056.t1;g10056.t2;g10226.t1;g10227.t1;g10341.t1;g10341.t2;g10341.t3;g10351.t1;g10351.t2;g1…	K04345+K01115+K07763+K13293+K08524+K08524+K04513+K04513+K04634+K04634+K04634+K04365+K04361+K13302+K04345+K04345+K04345+K08045+K08049+K13293+K13293+K05870+K04371+K04439+K08835+K04958+K04958+K04958+K05858+K05858+K02677+K02677+K04362+K04454+K04632+K04632+K07763+K07763+K05858+K05858+K05858+K08867+K08867+K08042
Organismal Systems	Immune system	T cell receptor signaling pathway	43	ko04660	g1776.t1;g1776.t2;g1776.t3;g1089.t1;g2098.t1;g2098.t2;g2279.t1;g2342.t1;g2394.t1;g5122.t1;g1147.t1;g626.t1;g626.t2;g2535.t1;g3661.t1;g3662.t1;g8498.t1;g8193.t1;g9154.t1;g9154.t2;g6262.t1;g6549.t1;g6549.t2;g6551.t1;g9405.t1;g9478.t1;g9478.t2;g6865.t1;g7162.t1;g7198.t1;g7212.t1;g7212.t2;g7243.t1;g7321.t1;g9748.t1;g9748.t2;g9778.t1;g9788.t1;g10976.t1;g10248.t1;g10399.t1;g10399.t2;g6176.t1	K11584+K11584+K11584+K04364+K12076+K12076+K03456+K19862+K01116+K02089+K04409+K04513+K04513+K11583+K00922+K00922+K11584+K04382+K06276+K06276+K04427+K04348+K04348+K04409+K07369+K04393+K04393+K04371+K04734+K04409+K06268+K06268+K07293+K11584+K06268+K06268+K02089+K04441+K04456+K03099+K07827+K07827+K04456
Organismal Systems	Endocrine system	Growth hormone synthesis, secretion and action	43	ko04935	g4457.t1;g1089.t1;g4215.t1;g2394.t1;g2926.t1;g2926.t2;g2926.t3;g3057.t1;g3630.t1;g3630.t2;g3630.t3;g3661.t1;g3662.t1;g8202.t1;g9017.t1;g5839.t1;g6493.t3;g6865.t1;g6926.t1;g6926.t2;g7429.t1;g7431.t1;g7431.t2;g7433.t1;g7490.t1;g7490.t2;g9788.t1;g10695.t1;g10908.t1;g10908.t2;g10976.t1;g10983.t1;g10983.t2;g10056.t1;g10056.t2;g10248.t1;g10341.t1;g10341.t2;g10341.t3;g10399.t1;g10399.t2;g10465.t1;g6176.…	K04345+K04364+K04498+K01116+K04634+K04634+K04634+K04851+K04345+K04345+K04345+K00922+K00922+K16172+K08045+K08049+K05870+K04371+K04218+K04218+K04958+K04958+K04958+K04430+K05858+K05858+K04441+K07203+K02677+K02677+K04456+K04432+K04432+K04632+K04632+K03099+K05858+K05858+K05858+K07827+K07827+K08042+K04456
Organismal Systems	Aging	Longevity regulating pathway	42	ko04211	g4082.t1;g1889.t1;g4457.t1;g1676.t1;g1504.t1;g933.t1;g2229.t1;g5358.t1;g2426.t1;g2427.t2;g1655.t1;g2735.t1;g2735.t2;g3630.t1;g3630.t2;g3630.t3;g3661.t1;g3662.t1;g3683.t1;g3683.t2;g3683.t4;g8202.t1;g8206.t1;g9017.t1;g5839.t1;g9263.t1;g9263.t2;g9263.t3;g6239.t1;g6387.t1;g6493.t3;g10695.t1;g10788.t1;g10806.t1;g10976.t1;g10327.t1;g10399.t1;g10399.t2;g10465.t1;g10480.t1;g6129.t1;g6176.t1	K07297+K07200+K04345+K07297+K07359+K03259+K07199+K07198+K09408+K09408+K11420+K03259+K03259+K04345+K04345+K04345+K00922+K00922+K04688+K04688+K04688+K16172+K07204+K08045+K08049+K11420+K11420+K11420+K07298+K11411+K05870+K07203+K04527+K08331+K04456+K19730+K07827+K07827+K08042+K11420+K03781+K04456
Organismal Systems	Aging	Longevity regulating pathway - worm	42	ko04212	g4059.t1;g5194.t1;g995.t1;g1018.t1;g4641.t1;g4641.t2;g1484.t1;g5521.t1;g2426.t1;g2427.t2;g2543.t1;g2861.t1;g3213.t1;g3470.t1;g3471.t1;g3471.t2;g3661.t1;g3662.t1;g3683.t1;g3683.t2;g3683.t4;g8097.t3;g8540.t1;g8541.t1;g8174.t1;g8202.t1;g5695.t1;g8611.t1;g9550.t1;g6387.t1;g6780.t1;g7103.t1;g7182.t1;g7182.t2;g7405.t1;g9788.t1;g10583.t1;g10695.t1;g10788.t1;g10976.t1;g6129.t1;g6176.t1	K16197+K04077+K09414+K10798+K10798+K10798+K01358+K11204+K09408+K09408+K16197+K19770+K08341+K04077+K04077+K04077+K00922+K00922+K04688+K04688+K04688+K17794+K04077+K04077+K00507+K16172+K16197+K16197+K04043+K11411+K08269+K04043+K08035+K08035+K00799+K04441+K17491+K07203+K04527+K04456+K03781+K04456
Organismal Systems	Excretory system	Endocrine and other factor-regulated calcium reabsorption	42	ko04961	g4457.t1;g1748.t1;g1748.t2;g1065.t1;g1065.t2;g1065.t3;g735.t1;g2247.t1;g1149.t1;g2773.t1;g2926.t1;g2926.t2;g2926.t3;g3238.t1;g3513.t1;g3630.t1;g3630.t2;g3630.t3;g7690.t1;g5726.t1;g5839.t1;g5840.t1;g8005.t1;g8005.t2;g6594.t1;g6628.t1;g6668.t1;g6668.t2;g6668.t3;g6921.t3;g7490.t1;g7490.t2;g10908.t1;g10908.t2;g10962.t1;g10056.t1;g10056.t2;g10280.t1;g10341.t1;g10341.t2;g10341.t3;g10376.t1	K04345+K05849+K05849+K11826+K11826+K11826+K01539+K08550+K01539+K01539+K04634+K04634+K04634+K05850+K07904+K04345+K04345+K04345+K01528+K04646+K08049+K11825+K11824+K11824+K01540+K01528+K01528+K01528+K01528+K01528+K05858+K05858+K02677+K02677+K01539+K04632+K04632+K11824+K05858+K05858+K05858+K04644
Organismal Systems	Immune system	Fc gamma R-mediated phagocytosis	41	ko04666	g1895.t1;g4295.t1;g1753.t1;g1753.t2;g1369.t1;g4036.t1;g4036.t2;g427.t1;g4951.t1;g2394.t1;g1147.t1;g2567.t1;g2601.t1;g2601.t2;g2682.t1;g2682.t2;g2711.t2;g2962.t1;g2962.t2;g3457.t1;g3661.t1;g3662.t1;g3683.t1;g3683.t2;g3683.t4;g8130.t1;g8130.t2;g9243.t1;g6551.t1;g9478.t1;g9478.t2;g6865.t1;g7198.t1;g7237.t1;g7284.t1;g9826.t1;g10908.t1;g10908.t2;g10976.t1;g10467.t1;g6176.t1	K18584+K05765+K17260+K17260+K04392+K06068+K06068+K01115+K04392+K01116+K04409+K00889+K05765+K05765+K05757+K05757+K00889+K00889+K00889+K05758+K00922+K00922+K04688+K04688+K04688+K05754+K05754+K05756+K04409+K04393+K04393+K04371+K04409+K04718+K18050+K01080+K02677+K02677+K04456+K04392+K04456
Organismal Systems	Endocrine system	Insulin secretion	41	ko04911	g4457.t1;g735.t1;g4711.t1;g4671.t1;g1149.t1;g2506.t1;g2773.t1;g2926.t1;g2926.t2;g2926.t3;g3057.t1;g3138.t1;g3138.t2;g3138.t3;g3138.t4;g3630.t1;g3630.t2;g3630.t3;g9017.t1;g5839.t1;g8269.t1;g8269.t2;g6395.t1;g6493.t3;g6594.t1;g7075.t1;g7490.t1;g7490.t2;g10667.t1;g10667.t2;g10667.t3;g10908.t1;g10908.t2;g10962.t1;g10056.t1;g10056.t2;g10293.t2;g10341.t1;g10341.t2;g10341.t3;g10465.t1	K04345+K01539+K07299+K07299+K01539+K04560+K01539+K04634+K04634+K04634+K04851+K04936+K04936+K04936+K04936+K04345+K04345+K04345+K08045+K08049+K07299+K07299+K04943+K05870+K01540+K04944+K05858+K05858+K04560+K04560+K04560+K02677+K02677+K01539+K04632+K04632+K04962+K05858+K05858+K05858+K08042
Organismal Systems	Aging	Longevity regulating pathway - multiple species	40	ko04213	g1889.t1;g4457.t1;g1524.t1;g1084.t1;g1084.t2;g2229.t1;g5358.t1;g2375.t1;g2426.t1;g2427.t2;g1642.t1;g3539.t1;g3630.t1;g3630.t2;g3630.t3;g3661.t1;g3662.t1;g3683.t1;g3683.t2;g3683.t4;g8202.t1;g8206.t1;g9017.t1;g9080.t1;g9080.t2;g5839.t1;g9551.t1;g6387.t1;g7147.t2;g7182.t1;g7182.t2;g10695.t1;g10788.t1;g10976.t1;g9935.t1;g10399.t1;g10399.t2;g10465.t1;g6129.t1;g6176.t1	K07200+K04345+K03283+K06067+K06067+K07199+K07198+K04565+K09408+K09408+K03283+K09542+K04345+K04345+K04345+K00922+K00922+K04688+K04688+K04688+K16172+K07204+K08045+K03283+K03283+K08049+K03695+K11411+K04565+K08035+K08035+K07203+K04527+K04456+K06067+K07827+K07827+K08042+K03781+K04456
Organismal Systems	Nervous system	GABAergic synapse	40	ko04727	g1988.t1;g1888.t1;g1908.t1;g4457.t1;g885.t1;g885.t2;g885.t3;g885.t4;g661.t1;g1460.t1;g1463.t1;g1472.t1;g734.t1;g2170.t1;g2416.t1;g3057.t1;g3171.t1;g3171.t2;g3195.t1;g3204.t1;g3213.t1;g3630.t1;g3630.t2;g3630.t3;g9017.t1;g5839.t1;g6247.t1;g6247.t2;g5601.t1;g8866.t1;g7803.t1;g6570.t1;g10777.t1;g10777.t2;g10825.t1;g10908.t1;g10908.t2;g10157.t1;g10465.t1;g10502.t1	K04534+K01915+K04539+K04345+K04534+K04534+K04534+K04534+K04534+K04536+K04536+K01425+K15376+K04347+K15376+K04851+K05034+K05034+K13524+K04615+K08341+K04345+K04345+K04345+K08045+K08049+K04534+K04534+K04534+K04534+K06027+K04849+K15015+K15015+K04534+K02677+K02677+K05704+K08042+K05181
Organismal Systems	Nervous system	Long-term depression	39	ko04730	g1988.t1;g885.t1;g885.t2;g885.t3;g885.t4;g661.t1;g2279.t1;g2366.t1;g2491.t1;g2846.t1;g2846.t2;g2926.t1;g2926.t2;g2926.t3;g3112.t1;g3230.t1;g8193.t1;g6247.t1;g6247.t2;g5601.t1;g8866.t1;g6865.t1;g7429.t1;g7431.t1;g7431.t2;g7460.t1;g7490.t1;g7490.t2;g10825.t1;g10847.t1;g10908.t1;g10908.t2;g10056.t1;g10056.t2;g10341.t1;g10341.t2;g10341.t3;g10399.t1;g10399.t2	K04534+K04534+K04534+K04534+K04534+K04534+K03456+K12319+K04603+K07376+K07376+K04634+K04634+K04634+K04365+K07376+K04382+K04534+K04534+K04534+K04534+K04371+K04958+K04958+K04958+K12319+K05858+K05858+K04534+K04578+K02677+K02677+K04632+K04632+K05858+K05858+K05858+K07827+K07827
Organismal Systems	Sensory system	Phototransduction - fly	39	ko04745	g1609.t1;g4022.t1;g4022.t2;g375.t1;g376.t1;g940.t1;g940.t2;g2556.t1;g2759.t1;g2759.t2;g2926.t1;g2926.t2;g2926.t3;g3373.t1;g3402.t1;g3412.t1;g3422.t1;g3422.t2;g3426.t1;g3426.t2;g3452.t1;g6959.t1;g7107.t1;g7429.t1;g7431.t1;g7431.t2;g7469.t1;g7490.t1;g7490.t2;g9621.t1;g9632.t1;g9781.t1;g10530.t1;g10908.t1;g10908.t2;g10128.t1;g10341.t1;g10341.t2;g10341.t3	K05692+K02183+K02183+K13806+K13806+K02183+K02183+K02183+K02183+K02183+K04634+K04634+K04634+K02183+K02183+K02183+K02183+K02183+K02183+K02183+K02183+K05692+K02183+K04958+K04958+K04958+K05692+K05858+K05858+K02183+K02183+K05692+K02183+K02677+K02677+K13807+K05858+K05858+K05858
Organismal Systems	Immune system	NOD-like receptor signaling pathway	38	ko04621	g4036.t1;g4036.t2;g359.t1;g359.t2;g2216.t1;g3776.t1;g3956.t1;g2343.t1;g626.t1;g626.t2;g2904.t1;g2904.t2;g2904.t3;g3157.t1;g3213.t1;g8499.t1;g8535.t1;g8374.t1;g9092.t1;g5904.t1;g5904.t2;g6262.t1;g5643.t1;g6702.t1;g6865.t1;g7162.t1;g7225.t1;g7429.t1;g7431.t1;g7431.t2;g7455.t1;g7490.t1;g7490.t2;g9788.t1;g10321.t1;g10341.t1;g10341.t2;g10341.t3	K06068+K06068+K04079+K04079+K01363+K01363+K04079+K06071+K04513+K04513+K17065+K17065+K17065+K15040+K08341+K17065+K01363+K03671+K01363+K20915+K20915+K04427+K06030+K01363+K04371+K04734+K20858+K04958+K04958+K04958+K01363+K05858+K05858+K04441+K01363+K05858+K05858+K05858
Organismal Systems	Digestive system	Bile secretion	38	ko04976	g4457.t1;g1664.t1;g1664.t2;g1031.t1;g1094.t1;g1094.t2;g4623.t1;g4623.t2;g767.t1;g735.t1;g4711.t1;g4671.t1;g5448.t1;g2292.t1;g2292.t2;g2352.t1;g2352.t2;g1943.t1;g1943.t2;g1149.t1;g2773.t1;g3313.t1;g3313.t2;g3630.t1;g3630.t2;g3630.t3;g9017.t1;g5839.t1;g8269.t1;g8269.t2;g6395.t1;g5645.t1;g6594.t1;g7356.t1;g10962.t1;g10056.t1;g10056.t2;g10465.t1	K04345+K09869+K09869+K14349+K05658+K05658+K14360+K14360+K00699+K01539+K07299+K07299+K14360+K00021+K00021+K08524+K08524+K08537+K08537+K01539+K01539+K00699+K00699+K04345+K04345+K04345+K08045+K08049+K07299+K07299+K04943+K05658+K01540+K05658+K01539+K04632+K04632+K08042
Organismal Systems	Endocrine system	Thyroid hormone synthesis	37	ko04918	g4457.t1;g39.t1;g930.t1;g735.t1;g828.t1;g2320.t1;g1149.t1;g2773.t1;g2926.t1;g2926.t2;g2926.t3;g3534.t1;g3535.t1;g3535.t3;g3630.t1;g3630.t2;g3630.t3;g8167.t1;g9017.t1;g5839.t1;g6493.t3;g6594.t1;g7429.t1;g7431.t1;g7431.t2;g7490.t1;g7490.t2;g10908.t1;g10908.t2;g10962.t1;g10056.t1;g10056.t2;g10341.t1;g10341.t2;g10341.t3;g10413.t1;g10465.t1	K04345+K09490+K09490+K01539+K09490+K00383+K01539+K01539+K04634+K04634+K04634+K13411+K09582+K09582+K04345+K04345+K04345+K08054+K08045+K08049+K05870+K01540+K04958+K04958+K04958+K05858+K05858+K02677+K02677+K01539+K04632+K04632+K05858+K05858+K05858+K06233+K08042
Organismal Systems	Sensory system	Olfactory transduction	35	ko04740	g4457.t1;g1748.t1;g1748.t2;g4022.t1;g4022.t2;g1460.t1;g1463.t1;g940.t1;g940.t2;g2556.t1;g2759.t1;g2759.t2;g2846.t1;g2846.t2;g3230.t1;g3373.t1;g3402.t1;g3412.t1;g3422.t1;g3422.t2;g3426.t1;g3426.t2;g3452.t1;g3630.t1;g3630.t2;g3630.t3;g7787.t1;g7787.t2;g6859.t1;g6859.t2;g6912.t1;g7107.t1;g9621.t1;g9632.t1;g10530.t1	K04345+K05849+K05849+K02183+K02183+K04536+K04536+K02183+K02183+K02183+K02183+K02183+K07376+K07376+K07376+K02183+K02183+K02183+K02183+K02183+K02183+K02183+K02183+K04345+K04345+K04345+K04952+K04952+K04950+K04950+K04439+K02183+K02183+K02183+K02183
Organismal Systems	Immune system	Antigen processing and presentation	32	ko04612	g1996.t1;g1996.t2;g1996.t3;g1672.t1;g1524.t1;g359.t1;g359.t2;g39.t1;g930.t1;g2216.t1;g3776.t1;g3956.t1;g828.t1;g1642.t1;g1928.t1;g3031.t1;g3031.t2;g3031.t3;g3294.t1;g8535.t1;g8167.t1;g9080.t1;g9080.t2;g9092.t1;g6493.t3;g5637.t1;g6702.t1;g7346.t1;g7346.t2;g7455.t1;g10321.t1;g6167.t1	K08059+K08059+K08059+K08057+K03283+K04079+K04079+K09490+K09490+K01363+K01363+K04079+K09490+K03283+K01369+K08066+K08066+K08066+K01365+K01363+K08054+K03283+K03283+K01363+K05870+K08059+K01363+K08064+K08064+K01363+K01363+K01365
Organismal Systems	Excretory system	Vasopressin-regulated water reabsorption	32	ko04962	g4457.t1;g890.t1;g2233.t1;g2235.t1;g5486.t1;g5486.t2;g1346.t1;g1346.t2;g3339.t1;g3513.t1;g3630.t1;g3630.t2;g3630.t3;g5839.t1;g6351.t1;g6493.t3;g6530.t1;g6530.t2;g6530.t3;g7803.t1;g6971.t1;g6972.t1;g6973.t1;g6979.t1;g6980.t1;g7476.t1;g7482.t1;g10956.t1;g10056.t1;g10056.t2;g10297.t1;g10297.t2	K04345+K10418+K10414+K10414+K10428+K10428+K10418+K10418+K10418+K07904+K04345+K04345+K04345+K08049+K10416+K05870+K10415+K10415+K10415+K06027+K10413+K10413+K10413+K10413+K10413+K10418+K10418+K12462+K04632+K04632+K07888+K07888
Organismal Systems	Endocrine system	Cortisol synthesis and secretion	31	ko04927	g4457.t1;g1031.t1;g4806.t1;g2926.t1;g2926.t2;g2926.t3;g2936.t1;g2936.t2;g2936.t3;g3057.t1;g3630.t1;g3630.t2;g3630.t3;g9017.t1;g9177.t1;g5839.t1;g5850.t1;g6493.t3;g6856.t1;g6871.t1;g7429.t1;g7431.t1;g7431.t2;g7490.t1;g7490.t2;g10056.t1;g10056.t2;g10341.t1;g10341.t2;g10341.t3;g10465.t1	K04345+K14349+K00513+K04634+K04634+K04634+K18437+K18437+K18437+K04851+K04345+K04345+K04345+K08045+K04914+K08049+K04465+K05870+K09355+K04854+K04958+K04958+K04958+K05858+K05858+K04632+K04632+K05858+K05858+K05858+K08042
Organismal Systems	Endocrine system	PPAR signaling pathway	29	ko03320	g3910.t1;g2156.t1;g2203.t1;g2204.t1;g5420.t1;g5467.t1;g2352.t1;g2352.t2;g2383.t1;g2383.t2;g5100.t1;g3143.t1;g3265.t1;g3265.t2;g3390.t1;g3390.t2;g8174.t1;g9154.t1;g9154.t2;g5769.t1;g5619.t1;g5628.t2;g7776.t1;g7776.t2;g7047.t1;g10858.t1;g9995.t2;g10345.t1;g5985.t1	K01897+K08752+K08752+K08752+K08765+K00864+K08524+K08524+K00029+K00029+K08770+K08766+K08752+K08752+K08764+K08764+K00507+K06276+K06276+K00232+K06272+K08767+K00864+K00864+K08752+K01897+K08770+K01641+K01596
Organismal Systems	Environmental adaptation	Plant-pathogen interaction	29	ko04626	g4022.t1;g4022.t2;g359.t1;g359.t2;g940.t1;g940.t2;g3956.t1;g5467.t1;g2556.t1;g2759.t1;g2759.t2;g3373.t1;g3402.t1;g3412.t1;g3422.t1;g3422.t2;g3426.t1;g3426.t2;g3452.t1;g7776.t1;g7776.t2;g7104.t1;g7107.t1;g9621.t1;g9632.t1;g10530.t1;g10784.t1;g10784.t2;g10784.t3	K02183+K02183+K04079+K04079+K02183+K02183+K04079+K00864+K02183+K02183+K02183+K02183+K02183+K02183+K02183+K02183+K02183+K02183+K02183+K00864+K00864+K01373+K02183+K02183+K02183+K02183+K02358+K02358+K02358
Organismal Systems	Immune system	Leukocyte transendothelial migration	26	ko04670	g1609.t1;g1671.t1;g1369.t1;g1457.t1;g1457.t2;g394.t1;g4951.t1;g5341.t1;g2394.t1;g626.t1;g626.t2;g3248.t1;g3248.t2;g3661.t1;g3662.t1;g9478.t1;g9478.t2;g6959.t1;g7243.t1;g7469.t1;g9781.t1;g9788.t1;g10654.t1;g10908.t1;g10908.t2;g10467.t1	K05692+K05691+K04392+K04353+K04353+K04514+K04392+K05719+K01116+K04513+K04513+K05700+K05700+K00922+K00922+K04393+K04393+K05692+K07293+K05692+K05692+K04441+K02105+K02677+K02677+K04392
Organismal Systems	Endocrine system	GnRH secretion	26	ko04929	g2926.t1;g2926.t2;g2926.t3;g3057.t1;g3204.t1;g3661.t1;g3662.t1;g6395.t1;g6865.t1;g6871.t1;g6912.t1;g7075.t1;g7429.t1;g7431.t1;g7431.t2;g7490.t1;g7490.t2;g10908.t1;g10908.t2;g10976.t1;g10341.t1;g10341.t2;g10341.t3;g10399.t1;g10399.t2;g6176.t1	K04634+K04634+K04634+K04851+K04615+K00922+K00922+K04943+K04371+K04854+K04439+K04944+K04958+K04958+K04958+K05858+K05858+K02677+K02677+K04456+K05858+K05858+K05858+K07827+K07827+K04456
Organismal Systems	Development and regeneration	Osteoclast differentiation	25	ko04380	g1369.t1;g1089.t1;g4951.t1;g1923.t1;g3173.t1;g3661.t1;g3662.t1;g5812.t1;g6262.t1;g6493.t3;g6549.t1;g6549.t2;g6865.t1;g7162.t1;g7212.t1;g7212.t2;g7429.t1;g7431.t1;g7431.t2;g9748.t1;g9748.t2;g9788.t1;g10976.t1;g10467.t1;g6176.t1	K04392+K04364+K04392+K14379+K04674+K00922+K00922+K05853+K04427+K05870+K04348+K04348+K04371+K04734+K06268+K06268+K04958+K04958+K04958+K06268+K06268+K04441+K04456+K04392+K04456
Organismal Systems	Immune system	Th17 cell differentiation	25	ko04659	g359.t1;g359.t2;g3956.t1;g2352.t1;g2352.t2;g2394.t1;g3173.t1;g8442.t1;g9172.t1;g6549.t1;g6549.t2;g9421.t1;g9421.t2;g7788.t1;g6865.t1;g7162.t1;g7212.t1;g7212.t2;g7302.t1;g9748.t1;g9748.t2;g9788.t1;g10695.t1;g10988.t1;g10988.t2	K04079+K04079+K04079+K08524+K08524+K01116+K04674+K08532+K04500+K04348+K04348+K04501+K04501+K09093+K04371+K04734+K06268+K06268+K04500+K06268+K06268+K04441+K07203+K04501+K04501
Organismal Systems	Circulatory system	Cardiac muscle contraction	24	ko04260	g1748.t1;g1748.t2;g4628.t1;g735.t1;g5275.t1;g1149.t1;g2773.t1;g2900.t1;g3057.t1;g3460.t1;g8365.t1;g5771.t1;g5812.t1;g9341.t1;g6594.t1;g7483.t1;g7483.t2;g10962.t1;g11021.t1;g10288.t1;g10288.t2;g10288.t3;g10293.t2;g5932.t1	K05849+K05849+K10373+K01539+K00416+K01539+K01539+K00418+K04851+K04863+K00411+K02263+K05853+K00415+K01540+K12045+K12045+K01539+K00414+K04869+K04869+K04869+K04962+K02265
Organismal Systems	Immune system	Natural killer cell mediated cytotoxicity	24	ko04650	g1369.t1;g1089.t1;g4951.t1;g2394.t1;g1147.t1;g3112.t1;g3661.t1;g3662.t1;g6549.t1;g6549.t2;g6551.t1;g6865.t1;g7198.t1;g7212.t1;g7212.t2;g7243.t1;g9748.t1;g9748.t2;g10908.t1;g10908.t2;g10248.t1;g10399.t1;g10399.t2;g10467.t1	K04392+K04364+K04392+K01116+K04409+K04365+K00922+K00922+K04348+K04348+K04409+K04371+K04409+K06268+K06268+K07293+K06268+K06268+K02677+K02677+K03099+K07827+K07827+K04392
Organismal Systems	Sensory system	Phototransduction	24	ko04744	g4022.t1;g4022.t2;g1460.t1;g1463.t1;g940.t1;g940.t2;g2556.t1;g2759.t1;g2759.t2;g3373.t1;g3402.t1;g3412.t1;g3422.t1;g3422.t2;g3426.t1;g3426.t2;g3452.t1;g7787.t1;g7787.t2;g7107.t1;g9621.t1;g9632.t1;g10530.t1;g10643.t1	K02183+K02183+K04536+K04536+K02183+K02183+K02183+K02183+K02183+K02183+K02183+K02183+K02183+K02183+K02183+K02183+K02183+K04952+K04952+K02183+K02183+K02183+K02183+K13765
Organismal Systems	Digestive system	Protein digestion and absorption	24	ko04974	g1748.t1;g1748.t2;g244.t1;g735.t1;g4836.t1;g4839.t1;g2356.t1;g1149.t1;g2773.t1;g3004.t1;g3004.t2;g3211.t3;g3385.t1;g3385.t2;g7809.t1;g7809.t2;g7809.t3;g9247.t1;g6594.t1;g10962.t1;g11013.t1;g10135.t1;g10137.t1;g10139.t1	K05849+K05849+K01298+K01539+K14206+K14206+K01389+K01539+K01539+K01278+K01278+K14210+K14206+K14206+K08606+K08606+K08606+K14206+K01540+K01539+K14206+K01285+K01285+K01285
Organismal Systems	Endocrine system	Adipocytokine signaling pathway	23	ko04920	g4082.t1;g1889.t1;g1676.t1;g1504.t1;g3910.t1;g2229.t1;g4711.t1;g4671.t1;g5358.t1;g5420.t1;g2352.t1;g2352.t2;g8202.t1;g8269.t1;g8269.t2;g6239.t1;g7162.t1;g7243.t1;g10695.t1;g10858.t1;g10976.t1;g5985.t1;g6176.t1	K07297+K07200+K07297+K07359+K01897+K07199+K07299+K07299+K07198+K08765+K08524+K08524+K16172+K07299+K07299+K07298+K04734+K07293+K07203+K01897+K04456+K01596+K04456
Organismal Systems	Immune system	Fc epsilon RI signaling pathway	21	ko04664	g1369.t1;g1089.t1;g4951.t1;g2394.t1;g3661.t1;g3662.t1;g9154.t1;g9154.t2;g6865.t1;g7433.t1;g9788.t1;g10908.t1;g10908.t2;g10976.t1;g10983.t1;g10983.t2;g10248.t1;g10399.t1;g10399.t2;g10467.t1;g6176.t1	K04392+K04364+K04392+K01116+K00922+K00922+K06276+K06276+K04371+K04430+K04441+K02677+K02677+K04456+K04432+K04432+K03099+K07827+K07827+K04392+K04456
Organismal Systems	Endocrine system	Regulation of lipolysis in adipocytes	21	ko04923	g4457.t1;g1274.t1;g2846.t1;g2846.t2;g3230.t1;g3630.t1;g3630.t2;g3630.t3;g3661.t1;g3662.t1;g8202.t1;g9017.t1;g5839.t1;g6279.t1;g10788.t1;g10874.t1;g10976.t1;g10056.t1;g10056.t2;g10465.t1;g6176.t1	K04345+K07188+K07376+K07376+K07376+K04345+K04345+K04345+K00922+K00922+K16172+K08045+K08049+K12323+K04527+K07188+K04456+K04632+K04632+K08042+K04456
Organismal Systems	Excretory system	Aldosterone-regulated sodium reabsorption	21	ko04960	g735.t1;g1149.t1;g2773.t1;g3542.t1;g3661.t1;g3662.t1;g8188.t1;g8188.t2;g8188.t3;g8188.t4;g8202.t1;g9154.t1;g9154.t2;g6594.t1;g6865.t1;g10788.t1;g10908.t1;g10908.t2;g10962.t1;g10399.t1;g10399.t2	K01539+K01539+K01539+K13302+K00922+K00922+K13358+K13358+K13358+K13358+K16172+K06276+K06276+K01540+K04371+K04527+K02677+K02677+K01539+K07827+K07827
Organismal Systems	Immune system	B cell receptor signaling pathway	20	ko04662	g1369.t1;g1089.t1;g4951.t1;g3661.t1;g3662.t1;g6549.t1;g6549.t2;g9405.t1;g6865.t1;g7162.t1;g7212.t1;g7212.t2;g9748.t1;g9748.t2;g10976.t1;g10248.t1;g10399.t1;g10399.t2;g10467.t1;g6176.t1	K04392+K04364+K04392+K00922+K00922+K04348+K04348+K07369+K04371+K04734+K06268+K06268+K06268+K06268+K04456+K03099+K07827+K07827+K04392+K04456
Organismal Systems	Digestive system	Fat digestion and absorption	19	ko04975	g4992.t1;g1231.t1;g4947.t1;g4947.t2;g5268.t1;g5268.t2;g5270.t1;g4342.t1;g4342.t2;g7700.t1;g7700.t2;g9326.t1;g9442.t1;g9442.t2;g9442.t3;g6964.t1;g9701.t1;g9826.t1;g10183.t1	K11155+K14457+K00626+K00626+K00626+K00626+K00626+K01047+K01047+K01047+K01047+K13509+K14457+K14457+K14457+K01047+K14457+K01080+K12298
Organismal Systems	Digestive system	Mineral absorption	19	ko04978	g1868.t1;g4996.t1;g1748.t1;g1748.t2;g3878.t1;g3878.t2;g1136.t1;g1456.t1;g1456.t2;g735.t1;g5247.t1;g1149.t1;g2773.t1;g3238.t1;g6594.t1;g6742.t1;g7340.t1;g10962.t1;g10391.t2	K00522+K14686+K05849+K05849+K14688+K14688+K00522+K05011+K05011+K01539+K14686+K01539+K01539+K05850+K01540+K07213+K17686+K01539+K04975
Organismal Systems	Excretory system	Collecting duct acid secretion	18	ko04966	g2684.t1;g2684.t2;g3396.t1;g3396.t2;g3396.t3;g3543.t1;g6213.t1;g6474.t1;g6474.t2;g6520.t1;g6552.t1;g10752.t1;g10812.t1;g10812.t2;g10814.t1;g10286.t4;g6097.t1;g6097.t2	K02152+K02152+K02154+K02154+K02154+K02147+K02146+K02148+K02148+K02150+K02154+K02155+K02145+K02145+K02145+K02155+K02151+K02151
Organismal Systems	Endocrine system	Prolactin signaling pathway	17	ko04917	g1089.t1;g2247.t1;g5556.t1;g5558.t1;g5558.t2;g2426.t1;g2427.t2;g3661.t1;g3662.t1;g6865.t1;g9788.t1;g10976.t1;g10157.t1;g10248.t1;g10399.t1;g10399.t2;g6176.t1	K04364+K08550+K00501+K00501+K00501+K09408+K09408+K00922+K00922+K04371+K04441+K04456+K05704+K03099+K07827+K07827+K04456
Organismal Systems	Digestive system	Carbohydrate digestion and absorption	17	ko04973	g735.t1;g1149.t1;g2773.t1;g3057.t1;g3661.t1;g3662.t1;g6440.t1;g6594.t1;g7078.t1;g7490.t1;g7490.t2;g10962.t1;g10976.t1;g10341.t1;g10341.t2;g10341.t3;g6176.t1	K01539+K01539+K01539+K04851+K00922+K00922+K00844+K01540+K00844+K05858+K05858+K01539+K04456+K05858+K05858+K05858+K04456
Organismal Systems	Development and regeneration	Dorso-ventral axis formation	16	ko04320	g1089.t1;g872.t1;g2569.t1;g3112.t1;g3506.t1;g3703.t1;g9253.t1;g6865.t1;g7253.t1;g7305.t1;g7420.t1;g10754.t1;g10248.t1;g10399.t1;g10399.t2;g5982.t1	K04364+K02359+K02602+K04365+K04361+K02360+K02602+K04371+K02177+K03102+K02177+K02359+K03099+K07827+K07827+K02602
Organismal Systems	Immune system	Toll-like receptor signaling pathway	16	ko04620	g1369.t1;g4951.t1;g3661.t1;g3662.t1;g8183.t1;g8183.t2;g6262.t1;g6865.t1;g7162.t1;g7433.t1;g9788.t1;g10976.t1;g10983.t1;g10983.t2;g10467.t1;g6176.t1	K04392+K04392+K00922+K00922+K05399+K05399+K04427+K04371+K04734+K04430+K04441+K04456+K04432+K04432+K04392+K04456
Organismal Systems	Environmental adaptation	Circadian rhythm	16	ko04710	g1889.t1;g1598.t1;g1598.t2;g1598.t3;g1455.t1;g2229.t1;g5358.t1;g5144.t1;g8442.t1;g6227.t1;g6493.t3;g7014.t1;g7286.t1;g11052.t1;g10070.t1;g10250.t1	K07200+K03094+K03094+K03094+K03094+K07199+K07198+K03868+K08532+K03094+K05870+K03868+K08959+K03347+K08531+K08959
Organismal Systems	Immune system	Cytosolic DNA-sensing pathway	15	ko04623	g3784.t1;g3784.t2;g1658.t1;g1145.t1;g2577.t1;g2780.t1;g3219.t1;g3729.t1;g8096.t1;g9010.t1;g9091.t1;g6725.t1;g7162.t1;g10518.t1;g10518.t2	K03022+K03022+K03027+K01158+K03019+K13116+K03023+K03016+K03014+K01158+K03020+K03007+K04734+K03027+K03027
Organismal Systems	Immune system	IL-17 signaling pathway	14	ko04657	g359.t1;g359.t2;g2190.t1;g3952.t1;g3956.t1;g3960.t1;g3110.t1;g3110.t2;g6262.t1;g6865.t1;g7162.t1;g9788.t1;g10650.t1;g10650.t2	K04079+K04079+K19603+K12890+K04079+K12890+K12890+K12890+K04427+K04371+K04734+K04441+K05168+K05168
Organismal Systems	Sensory system	Taste transduction	13	ko04742	g4457.t1;g2491.t1;g3079.t1;g3204.t1;g3630.t1;g3630.t2;g3630.t3;g5763.t1;g7490.t1;g7490.t2;g10341.t1;g10341.t2;g10341.t3	K04345+K04603+K04153+K04615+K04345+K04345+K04345+K04153+K05858+K05858+K05858+K05858+K05858
Organismal Systems	Endocrine system	Renin-angiotensin system	12	ko04614	g4961.t1;g2356.t1;g2768.t1;g2768.t2;g3320.t1;g6690.t1;g7105.t1;g7105.t2;g9857.t1;g10135.t1;g10137.t1;g10139.t1	K01322+K01389+K13289+K13289+K01322+K19514+K11140+K11140+K01322+K01285+K01285+K01285
Organismal Systems	Immune system	Th1 and Th2 cell differentiation	12	ko04658	g2394.t1;g3660.t1;g6549.t1;g6549.t2;g6865.t1;g7162.t1;g7199.t1;g7212.t1;g7212.t2;g9748.t1;g9748.t2;g9788.t1	K01116+K06053+K04348+K04348+K04371+K04734+K06051+K06268+K06268+K06268+K06268+K04441
Organismal Systems	Digestive system	Cholesterol metabolism	12	ko04979	g1031.t1;g806.t1;g2024.t1;g3157.t1;g8180.t1;g8180.t2;g5628.t2;g7038.t1;g7038.t2;g7038.t3;g7039.t1;g10413.t1	K14349+K01052+K06096+K15040+K06096+K06096+K08767+K06096+K06096+K06096+K06096+K06233
Organismal Systems	Immune system	Toll and Imd signaling pathway	11	ko04624	g4470.t1;g1003.t1;g1003.t2;g2897.t1;g3100.t1;g3534.t1;g6262.t1;g7162.t1;g9788.t1;g10983.t1;g10983.t2	K10704+K10704+K10704+K06689+K10580+K13411+K04427+K04734+K04441+K04432+K04432
Organismal Systems	Excretory system	Proximal tubule bicarbonate reclamation	11	ko04964	g1472.t1;g735.t1;g5039.t1;g1149.t1;g2737.t1;g2737.t2;g2773.t1;g6594.t1;g10569.t1;g10962.t1;g5985.t1	K01425+K01539+K00261+K01539+K13577+K13577+K01539+K01540+K00025+K01539+K01596
Organismal Systems	Endocrine system	Ovarian steroidogenesis	10	ko04913	g4457.t1;g3630.t1;g3630.t2;g3630.t3;g9017.t1;g5839.t1;g10788.t1;g10056.t1;g10056.t2;g10465.t1	K04345+K04345+K04345+K04345+K08045+K08049+K04527+K04632+K04632+K08042
Organismal Systems	Digestive system	Vitamin digestion and absorption	7	ko04977	g2405.t1;g2405.t2;g2876.t3;g7234.t1;g7385.t1;g10329.t1;g10329.t3	K14611+K14611+K14618+K05678+K05665+K14620+K14620
Organismal Systems	Immune system	RIG-I-like receptor signaling pathway	5	ko04622	g9166.t1;g6262.t1;g6984.t1;g7162.t1;g9788.t1	K11594+K04427+K09578+K04734+K04441
Organismal Systems	Immune system	Hematopoietic cell lineage	4	ko04640	g2356.t1;g3084.t1;g7105.t1;g7105.t2	K01389+K06460+K11140+K11140
Organismal Systems	Environmental adaptation	Circadian rhythm - plant	4	ko04712	g1116.t1;g9704.t1;g9704.t2;g5921.t1	K03115+K10143+K10143+K03097
Organismal Systems	Digestive system	Cobalamin transport and metabolism	2	ko04980	g2876.t3;g7234.t1	K14618+K05678
Organismal Systems	Immune system	Complement and coagulation cascades	1	ko04610	g2043.t1	K03982
Organismal Systems	Environmental adaptation	Circadian rhythm - fly	1	ko04711	g10560.t1	K09057

## Sheet: Table S3
Table S3 KEGG pathway annotation for genes containing a signal peptide without a transmembrane domain
KEGG_A_class	KEGG_B_class	Pathway	Count (52)	Pathway ID	Genes	K_IDs
Metabolism	Global and overview maps	Metabolic pathways	18	ko01100	g514.t1;g4307.t1;g1706.t1;g3909.t1;g732.t1;g732.t2;g5037.t1;g2331.t1;g4342.t2;g7817.t1;g7819.t1;g6313.t1;g6652.t1;g8059.t1;g10607.t2;g10607.t3;g10860.t1;g9287.t1	K01179+K01193+K05546+K01179+K18081+K18081+K01228+K00022+K01047+K00710+K00472+K05360+K12350+K14410+K01194+K01194+K08743+K01201
Cellular Processes	Transport and catabolism	Lysosome	14	ko04142	g1928.t1;g1145.t1;g2768.t1;g2768.t2;g8535.t1;g9010.t1;g9092.t1;g9133.t1;g6652.t1;g6702.t1;g6898.t1;g7104.t1;g8059.t1;g9287.t1	K01369+K01158+K13289+K13289+K01363+K01158+K01363+K01206+K12350+K01363+K01379+K01373+K14410+K01201
Genetic Information Processing	Folding, sorting and degradation	Protein processing in endoplasmic reticulum	8	ko04141	g1672.t1;g1688.t1;g1706.t1;g930.t1;g5037.t1;g5509.t1;g5510.t1;g6235.t1	K08057+K14026+K05546+K09490+K01228+K08288+K09517+K14008
Organismal Systems	Immune system	Antigen processing and presentation	6	ko04612	g1672.t1;g930.t1;g1928.t1;g8535.t1;g9092.t1;g6702.t1	K08057+K09490+K01369+K01363+K01363+K01363
Metabolism	Carbohydrate metabolism	Starch and sucrose metabolism	5	ko00500	g514.t1;g4307.t1;g3909.t1;g10607.t2;g10607.t3	K01179+K01193+K01179+K01194+K01194
Metabolism	Global and overview maps	Biosynthesis of secondary metabolites	5	ko01110	g4307.t1;g2331.t1;g4342.t2;g10607.t2;g10607.t3	K01193+K00022+K01047+K01194+K01194
Cellular Processes	Cell growth and death	Apoptosis	5	ko04210	g8535.t1;g9092.t1;g6702.t1;g6898.t1;g7104.t1	K01363+K01363+K01363+K01379+K01373
Cellular Processes	Transport and catabolism	Autophagy - animal	4	ko04140	g8535.t1;g9092.t1;g6702.t1;g6898.t1	K01363+K01363+K01363+K01379
Genetic Information Processing	Folding, sorting and degradation	Protein export	3	ko03060	g930.t1;g9462.t1;g9462.t2	K09490+K03107+K03107
Organismal Systems	Endocrine system	Renin-angiotensin system	3	ko04614	g2768.t1;g2768.t2;g10137.t1	K13289+K13289+K01285
Organismal Systems	Immune system	NOD-like receptor signaling pathway	3	ko04621	g8535.t1;g9092.t1;g6702.t1	K01363+K01363+K01363
Organismal Systems	Endocrine system	Renin secretion	3	ko04924	g8535.t1;g9092.t1;g6702.t1	K01363+K01363+K01363
Metabolism	Glycan biosynthesis and metabolism	N-Glycan biosynthesis	2	ko00510	g1706.t1;g5037.t1	K05546+K01228
Metabolism	Glycan biosynthesis and metabolism	Other glycan degradation	2	ko00511	g9133.t1;g9287.t1	K01206+K01201
Metabolism	Carbohydrate metabolism	Inositol phosphate metabolism	2	ko00562	g732.t1;g732.t2	K18081+K18081
Metabolism	Lipid metabolism	Ether lipid metabolism	2	ko00565	g4342.t2;g10860.t1	K01047+K08743
Metabolism	Lipid metabolism	Sphingolipid metabolism	2	ko00600	g6652.t1;g9287.t1	K12350+K01201
Environmental Information Processing	Signal transduction	Two-component system	2	ko02020	g514.t1;g3909.t1	K01179+K01179
Environmental Information Processing	Signal transduction	Ras signaling pathway	2	ko04014	g4342.t2;g10030.t2	K01047+K05208
Environmental Information Processing	Signal transduction	Phosphatidylinositol signaling system	2	ko04070	g732.t1;g732.t2	K18081+K18081
Environmental Information Processing	Signal transduction	Sphingolipid signaling pathway	2	ko04071	g6652.t1;g6898.t1	K12350+K01379
Cellular Processes	Cellular community - eukaryotes	Adherens junction	2	ko04520	g5264.t1;g6495.t1	K05694+K05695
Organismal Systems	Immune system	Cytosolic DNA-sensing pathway	2	ko04623	g1145.t1;g9010.t1	K01158+K01158
Human Diseases	Neurodegenerative disease	Amyotrophic lateral sclerosis	2	ko05014	g930.t1;g10030.t2	K09490+K05208
Human Diseases	Neurodegenerative disease	Prion disease	2	ko05020	g930.t1;g10030.t2	K09490+K05208
Human Diseases	Neurodegenerative disease	Pathways of neurodegeneration - multiple diseases	2	ko05022	g930.t1;g10030.t2	K09490+K05208
Human Diseases	Infectious disease: bacterial	Salmonella infection	2	ko05132	g2719.t1;g2719.t2	K19984+K19984
Metabolism	Carbohydrate metabolism	Galactose metabolism	1	ko00052	g4307.t1	K01193
Metabolism	Lipid metabolism	Fatty acid elongation	1	ko00062	g2331.t1	K00022
Metabolism	Lipid metabolism	Fatty acid degradation	1	ko00071	g2331.t1	K00022
Metabolism	Amino acid metabolism	Valine, leucine and isoleucine degradation	1	ko00280	g2331.t1	K00022
Metabolism	Amino acid metabolism	Lysine degradation	1	ko00310	g2331.t1	K00022
Metabolism	Amino acid metabolism	Arginine and proline metabolism	1	ko00330	g7819.t1	K00472
Metabolism	Amino acid metabolism	Tryptophan metabolism	1	ko00380	g2331.t1	K00022
Metabolism	Metabolism of other amino acids	Glutathione metabolism	1	ko00480	g6313.t1	K05360
Metabolism	Glycan biosynthesis and metabolism	Mucin type O-glycan biosynthesis	1	ko00512	g7817.t1	K00710
Metabolism	Glycan biosynthesis and metabolism	Other types of O-glycan biosynthesis	1	ko00514	g7817.t1	K00710
Metabolism	Lipid metabolism	Glycerophospholipid metabolism	1	ko00564	g4342.t2	K01047
Metabolism	Lipid metabolism	Arachidonic acid metabolism	1	ko00590	g4342.t2	K01047
Metabolism	Lipid metabolism	Linoleic acid metabolism	1	ko00591	g4342.t2	K01047
Metabolism	Lipid metabolism	alpha-Linolenic acid metabolism	1	ko00592	g4342.t2	K01047
Metabolism	Carbohydrate metabolism	Butanoate metabolism	1	ko00650	g2331.t1	K00022
Metabolism	Metabolism of cofactors and vitamins	Riboflavin metabolism	1	ko00740	g8059.t1	K14410
Metabolism	Metabolism of terpenoids and polyketides	Pinene, camphor and geraniol degradation	1	ko00907	g2331.t1	K00022
Metabolism	Xenobiotics biodegradation and metabolism	Caprolactam degradation	1	ko00930	g2331.t1	K00022
Metabolism	Xenobiotics biodegradation and metabolism	Drug metabolism - other enzymes	1	ko00983	g4564.t1	K01044
Metabolism	Global and overview maps	Microbial metabolism in diverse environments	1	ko01120	g2331.t1	K00022
Metabolism	Global and overview maps	Fatty acid metabolism	1	ko01212	g2331.t1	K00022
Genetic Information Processing	Transcription	Spliceosome	1	ko03040	g2226.t1	K12873
Genetic Information Processing	Information processing in viruses	Viral life cycle - HIV-1	1	ko03250	g8103.t3	K01349
Environmental Information Processing	Signal transduction	Rap1 signaling pathway	1	ko04015	g10030.t2	K05208
Environmental Information Processing	Signal transduction	Calcium signaling pathway	1	ko04020	g10030.t2	K05208
Environmental Information Processing	Signal transduction	cAMP signaling pathway	1	ko04024	g10030.t2	K05208
Environmental Information Processing	Signaling molecules and interaction	Neuroactive ligand-receptor interaction	1	ko04080	g10030.t2	K05208
Cellular Processes	Transport and catabolism	Phagosome	1	ko04145	g1672.t1	K08057
Cellular Processes	Transport and catabolism	Efferocytosis	1	ko04148	g1672.t1	K08057
Environmental Information Processing	Signal transduction	PI3K-Akt signaling pathway	1	ko04151	g6126.t1	K06240
Cellular Processes	Cell growth and death	Necroptosis	1	ko04217	g6652.t1	K12350
Organismal Systems	Circulatory system	Vascular smooth muscle contraction	1	ko04270	g4342.t2	K01047
Environmental Information Processing	Signal transduction	Wnt signaling pathway	1	ko04310	g2902.t1	K02166
Environmental Information Processing	Signal transduction	Hedgehog signaling pathway	1	ko04340	g264.t1	K10523
Environmental Information Processing	Signal transduction	Hedgehog signaling pathway - fly	1	ko04341	g264.t1	K10523
Organismal Systems	Development and regeneration	Axon guidance	1	ko04360	g10821.t1	K06839
Organismal Systems	Development and regeneration	Axon regeneration	1	ko04361	g10821.t1	K06839
Environmental Information Processing	Signal transduction	Hippo signaling pathway - fly	1	ko04391	g3327.t1	K16507
Environmental Information Processing	Signal transduction	Hippo signaling pathway - multiple species	1	ko04392	g3327.t1	K16507
Cellular Processes	Cellular community - eukaryotes	Focal adhesion	1	ko04510	g6126.t1	K06240
Environmental Information Processing	Signaling molecules and interaction	ECM-receptor interaction	1	ko04512	g6126.t1	K06240
Environmental Information Processing	Signaling molecules and interaction	Cell adhesion molecules	1	ko04514	g6495.t1	K05695
Cellular Processes	Cellular community - eukaryotes	Signaling pathways regulating pluripotency of stem cells	1	ko04550	g1069.t1	K09326
Organismal Systems	Environmental adaptation	Plant-pathogen interaction	1	ko04626	g7104.t1	K01373
Organismal Systems	Environmental adaptation	Circadian entrainment	1	ko04713	g10030.t2	K05208
Organismal Systems	Nervous system	Long-term potentiation	1	ko04720	g10030.t2	K05208
Organismal Systems	Nervous system	Glutamatergic synapse	1	ko04724	g10030.t2	K05208
Organismal Systems	Endocrine system	Insulin signaling pathway	1	ko04910	g6495.t1	K05695
Organismal Systems	Endocrine system	Estrogen signaling pathway	1	ko04915	g6898.t1	K01379
Organismal Systems	Endocrine system	Thyroid hormone synthesis	1	ko04918	g930.t1	K09490
Human Diseases	Endocrine and metabolic disease	Insulin resistance	1	ko04931	g6495.t1	K05695
Organismal Systems	Digestive system	Pancreatic secretion	1	ko04972	g4342.t2	K01047
Organismal Systems	Digestive system	Protein digestion and absorption	1	ko04974	g10137.t1	K01285
Organismal Systems	Digestive system	Fat digestion and absorption	1	ko04975	g4342.t2	K01047
Human Diseases	Neurodegenerative disease	Alzheimer disease	1	ko05010	g10030.t2	K05208
Human Diseases	Neurodegenerative disease	Parkinson disease	1	ko05012	g930.t1	K09490
Human Diseases	Neurodegenerative disease	Huntington disease	1	ko05016	g10030.t2	K05208
Human Diseases	Neurodegenerative disease	Spinocerebellar ataxia	1	ko05017	g10030.t2	K05208
Human Diseases	Substance dependence	Cocaine addiction	1	ko05030	g10030.t2	K05208
Human Diseases	Substance dependence	Amphetamine addiction	1	ko05031	g10030.t2	K05208
Human Diseases	Substance dependence	Nicotine addiction	1	ko05033	g10030.t2	K05208
Human Diseases	Substance dependence	Alcoholism	1	ko05034	g10030.t2	K05208
Human Diseases	Infectious disease: parasitic	Chagas disease	1	ko05142	g1672.t1	K08057
Human Diseases	Infectious disease: parasitic	Toxoplasmosis	1	ko05145	g6126.t1	K06240
Human Diseases	Infectious disease: parasitic	Amoebiasis	1	ko05146	g6126.t1	K06240
Human Diseases	Infectious disease: bacterial	Tuberculosis	1	ko05152	g6898.t1	K01379
Human Diseases	Infectious disease: viral	Human cytomegalovirus infection	1	ko05163	g1672.t1	K08057
Human Diseases	Infectious disease: viral	Human papillomavirus infection	1	ko05165	g6126.t1	K06240
Human Diseases	Infectious disease: viral	Human T-cell leukemia virus 1 infection	1	ko05166	g1672.t1	K08057
Human Diseases	Infectious disease: viral	Herpes simplex virus 1 infection	1	ko05168	g1672.t1	K08057
Human Diseases	Infectious disease: viral	Epstein-Barr virus infection	1	ko05169	g1672.t1	K08057
Human Diseases	Infectious disease: viral	Human immunodeficiency virus 1 infection	1	ko05170	g1672.t1	K08057
Human Diseases	Cancer: overview	Pathways in cancer	1	ko05200	g6126.t1	K06240
Human Diseases	Cancer: specific types	Small cell lung cancer	1	ko05222	g6126.t1	K06240
Human Diseases	Cardiovascular disease	Diabetic cardiomyopathy	1	ko05415	g6898.t1	K01379
Human Diseases	Cardiovascular disease	Lipid and atherosclerosis	1	ko05417	g930.t1	K09490

## Sheet: Table S4
Table S4 Comparative analysis of genome statistics among T. semipenetrans, five PPNs, C. elegans, and two animal-parasitic nematodes
	T. semipenetrans	M. incognita	M. enterolobii	G. rostochiensis	B. xylophilus	D. destructor	C. elegans	N. americanus	A. lumbricoides
genome size (Mb)	68.9	122	163	92.7	78.3	111	100.3	244	317
number of gene models (protein-coding genes)	11068	21830	29473	17856	15884	13931	19984	15728	23604
number of GHs	160	231	253	226	228	175	323	179	208
number of GTs	222	280	321	370	346	252	549	290	286
number of AAs	26	23	16	32	26	22	40	21	20
number of CEs	11	12	13	12	17	18	32	16	17
number of PLs	2	27	32	12	21	5	5	1	2
number of Cazyme	421	573	635	652	638	472	949	507	533
G protein-coupled receptors, GPCRs	105	30	67	269	392	123	1359	124	94
*The genomes of other nematodes were obtained from WormBase ParaSite (https://parasite.wormbase.org/index.html), the BioProject IDs were PRJNA340324, PRJNA340324, PRJNA695196, PRJEB40022, PRJNA312427, PRJNA13758, PRJNA72135, PRJEB4950 respectively.
